# Supplementary material for: Mechanistic insights into the gold(i)-catalyzed [3,3]-sigmatropic rearrangement of sulfoniums for the formation of chiral 1,4-dicarbonyls or formal α-arylation of carbonyl compounds
Source: Royal Society of Chemistry journal article supplement (doi:10.1039/d4qo01061b), 2024-01-01
Supplement: d4qo01061b1.pdf [file d4qo01061b1.pdf]

# Supporting Information

## Mechanistic Insights into the Gold(I)-Catalyzed [3,3]-Sigmatropic Rearrangement of Sulfoniums for the Formation of Chiral 1,4- Dicarbonyls or Formal $\alpha$ -Arylation of Carbonyl Compounds

Weiping Zhou,<sup>a</sup> Ya-Qing Huang,<sup>a</sup> Vincent Gandon,<sup>\*b</sup> Arnaud Voituriez<sup>\*a</sup>

<sup>a</sup> Université Paris-Saclay, CNRS, Institut de Chimie des Substances Naturelles, UPR 2301, 91198, Gif-sur-Yvette, France. E-mail: arnaud.voituriez@cnr.fr

<sup>b</sup> Université Paris-Saclay, CNRS, Institut de Chimie Moléculaire et des Matériaux d'Orsay, 91400, Orsay, France. E-mail: vincent.gandon@universite-paris-saclay.fr

### Table of Contents:

|                  |                                                               |             |
|------------------|---------------------------------------------------------------|-------------|
| <b>Part I:</b>   | <b>General information</b>                                    | <b>S-2</b>  |
| <b>Part II:</b>  | <b>Experimental procedures</b>                                | <b>S-3</b>  |
| <b>Part III:</b> | <b>NMR Spectra (<sup>1</sup>H NMR and <sup>13</sup>C NMR)</b> | <b>S-12</b> |
| <b>Part IV:</b>  | <b>Chiral HPLC spectra</b>                                    | <b>S-35</b> |
| <b>Part V:</b>   | <b>Computational details</b>                                  | <b>S-39</b> |

---

## **I. General information:**

Reactions were performed using oven dried glassware under an atmosphere of argon. All purifications were carried out under flash-chromatographic conditions on silica gel (Redi Sep prepacked column, 230–400 mesh) at medium pressure (20 psi) with use of a CombiFlash Companion or preparative HPLC. Reactions were monitored by thin-layer chromatography on Merck silica gel plates (60 F254 aluminum sheets) which were rendered visible by ultraviolet and spraying with KMnO<sub>4</sub> solution, followed by heating. Reagent-grade chemicals were obtained from diverse commercial suppliers and used as received. <sup>1</sup>H NMR (500 or 300 MHz) and <sup>13</sup>C NMR (125 or 75 MHz) spectra were recorded on Bruker Avance spectrometers at 298 K unless otherwise stated. Chemical shifts are given in ppm ( $\delta$ ) and are referenced to the internal solvent signal. Multiplicities are declared as follow: s (singlet), bs (broad singlet), d (doublet), t (triplet), q (quartet), dd (doublet of doublets), m (multiplet). Coupling constants *J* are given in Hz. Carbon multiplicities were determined by DEPT-135 experiment. Infrared spectra (IR) were recorded on a Perkin-Elmer FT-IR system using diamond window Dura SamplIR II and the data are reported in reciprocal centimeters (cm<sup>-1</sup>). Melting points were recorded in open capillary tubes on a Büchi B-540 apparatus and are uncorrected. High-resolution mass spectrometry (HRMS) was performed using electrospray ionization (ESI) and time-of-flight (TOF) analyzer, in positive-ion or negative-ion detection mode. Vinyl sulfoxide substrates<sup>1</sup> [(*R,Z*)-**1a**, (*R,E*)-**1a**, (*R,E*)-**1b**, (*R,E*)-**1d**] and propargyl derivatives **2a**; **2c-d**<sup>2</sup> were prepared according to the literature or commercially available, as for **2b** [13361-64-3].

---

<sup>1</sup> W. Zhou and A. Voituriez, *J. Am. Chem. Soc.*, 2021, **143**, 17348.

<sup>2</sup> (a) S. Iyer and L. S. Liebeskind, *J. Am. Chem. Soc.*, 1987, **109**, 2759; (b) L. F. Tietze, T. Neumann, M. Kajino and M. Pretor, *Synthesis*, 1995, **1995**, 1003.

## II. Experimental Procedures:

### A. General procedure for the synthesis of vinyl sulfoxide substrates.

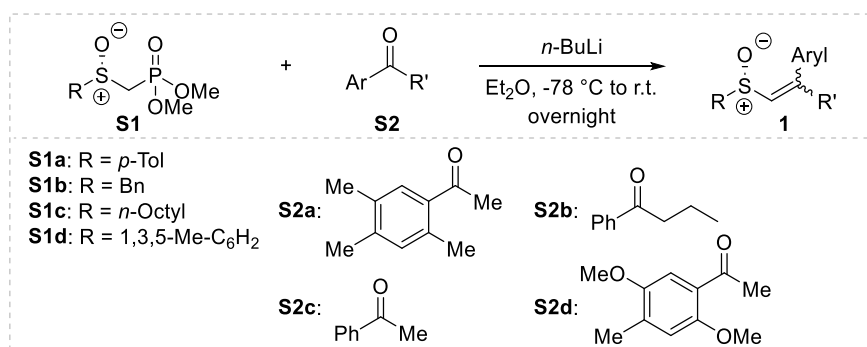

A flask was charged with diethyl ((*p*-tolylsulfinyl)methyl)phosphonate **S1a-c** (1.3 equiv) and 10 mL of anhydrous diethyl ether (10 mL/mmol of **S2a-d**) under argon. This mixture was stirred vigorously and cooled to -78 °C. At this temperature, the solution of *n*BuLi (1.6 M in pentane, 1.3 equiv) was slowly added dropwise over 30 min and then this cold mixture was stirred for another 30 min. To this mixture was added the solution of ketone **S2a-d** (1.0 equiv) in 10 mL of diethyl ether dropwise over 30 min. This solution was then slowly warmed to room temperature overnight. Finally, this resulting mixture was quenched with saturated NH<sub>4</sub>Cl aqueous solution. The aqueous layer was extracted with ethyl acetate. The combined organic phase was dried over anhydrous MgSO<sub>4</sub> and then concentrated *in vacuo*. After flash chromatography, the corresponding (*R,Z*)- and/or (*R,E*)-vinylsulfoxides were separated and isolated in pure form.

#### II.1. (*Z*)-1,2,4-Trimethyl-5-(1-(*p*-tolylsulfinyl)prop-1-en-2-yl)benzene (**Z-1c**).

Compound **Z-1c** was obtained with the use of **S1a** and **S2a** (1.0 mmol) as substrates. Colorless oil; *R<sub>f</sub>* 0.34 (EtOAc/Petroleum ether = 1/2); <sup>1</sup>H NMR (CDCl<sub>3</sub>, 500 MHz) δ 7.43 (d, *J* = 7.9 Hz, 2H), 7.29 (d, *J* = 7.9 Hz, 2H), 7.03 (s, 1H), 6.33 (s, 1H), 2.40 (s, 3H), 2.26 (s, 6H), 2.21-2.30 (m, 3H), 2.09 (s, 3H); <sup>13</sup>C NMR

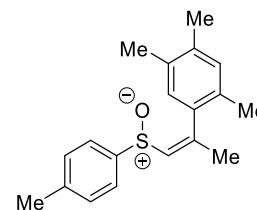

(CDCl<sub>3</sub>, 125 MHz) δ 142.0 (C), 141.2 (C), 136.8 (C), 136.3 (C), 134.9 (CH), 131.9 (CH), 131.4 (C), 130.0 (CH<sub>x</sub>3), 129.0 (C<sub>x</sub>2), 124.4 (CH<sub>x</sub>2), 25.8 (CH<sub>3</sub>), 21.5 (CH<sub>3</sub>), 19.6 (CH<sub>3</sub>), 19.4 (CH<sub>3</sub>), 19.1 (CH<sub>3</sub>); HRMS (ESI) calcd. for C<sub>19</sub>H<sub>23</sub>OS [M+H]<sup>+</sup>: 299.1470, found: 299.1466.

#### II.2. (*Z*)-1-Methyl-4-((2-phenylpent-1-en-1-yl)sulfinyl)benzene (**Z-1d**).

Compound **Z-1c** was obtained with the use of **S1a** and **S2b** (1.0 mmol) as substrates. Colorless oil; *R<sub>f</sub>* 0.18 (EtOAc/Petroleum ether = 1/3); <sup>1</sup>H NMR (CDCl<sub>3</sub>, 300 MHz) δ 7.48-7.39 (m, 5H), 7.35-7.28 (m, 4H), 6.30 (t, *J* = 1.2 Hz, 1H), 2.53-2.43 (m, 2H), 2.40

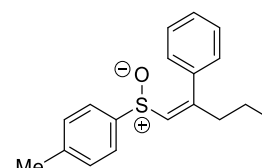

(s, 3H), 1.47-1.35 (m, 2H), 0.88 (t,  $J = 7.5$  Hz, 3H);  $^{13}\text{C}$  NMR ( $\text{CDCl}_3$ , 75 MHz)  $\delta$  155.0 (C), 142.3 (C), 141.1 (C), 138.1 (C), 133.9 (CH), 130.1 ( $\text{CH}_2$ ), 128.8 (CH), 128.6 ( $\text{CH}_2$ ), 128.4 ( $\text{CH}_2$ ), 124.5 ( $\text{CH}_2$ ), 41.3 ( $\text{CH}_2$ ), 21.5 ( $\text{CH}_3$ ), 20.7 ( $\text{CH}_2$ ), 13.7 ( $\text{CH}_3$ ); IR (neat)  $\nu_{\text{max}} = 2960, 2923, 2853, 1716, 1492, 1457, 1377, 1081, 1022, 1010, 808, 772, 701$   $\text{cm}^{-1}$ ; HRMS (ESI) calcd. for  $\text{C}_{18}\text{H}_{21}\text{OS}$   $[\text{M}+\text{H}]^+$ : 285.1313, found: 285.1308.

**II.3. (Z)-1-Methyl-4-((2-phenylprop-1-en-1-yl)sulfinyl)benzene (Z-1e).** Compound **Z-1e** was obtained with the use of **S1a** and **S2c** (1.0 mmol) as substrates. Yellow solid (229.6 mg, 30% yield); Mp 122-124 °C;  $R_f$  0.23 (EtOAc/Petroleum ether = 1/2);  $^1\text{H}$  NMR ( $\text{CDCl}_3$ , 500 MHz)  $\delta$  7.49 (d,  $J = 7.9$  Hz, 2H), 7.46-7.37 (m, 5H), 7.30 (d,  $J = 7.9$  Hz, 2H), 6.33 (s, 1H), 2.40 (s, 3H), 2.22 (s, 3H);  $^{13}\text{C}$  NMR ( $\text{CDCl}_3$ , 125 MHz)  $\delta$  150.9 (C), 142.0 (C), 141.2 (C), 138.6 (C), 134.0 (CH), 130.1 ( $\text{CH}_2$ ), 129.0 (CH), 128.6 ( $\text{CH}_2$ ), 128.1 ( $\text{CH}_2$ ), 124.5 ( $\text{CH}_2$ ), 25.9 ( $\text{CH}_3$ ), 21.5 ( $\text{CH}_3$ ); HRMS (ESI) calcd. for  $\text{C}_{16}\text{H}_{17}\text{OS}$   $[\text{M}+\text{H}]^+$ : 257.1000, found: 257.0995.

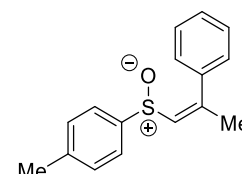

**II.4. (S,Z)-1-(1-(Benzylsulfinyl)prop-1-en-2-yl)-2,5-dimethoxy-4-methylbenzene ((S,Z)-1f).** Compound **1f** was obtained with the use of **S1b** and **S2d** (1.0 mmol) as substrates. White solid (125 mg, 34% yield); *E/Z* geometry of the double bond was assigned by NOESY analysis. Mp 106-108 °C;  $R_f$  0.18 (EtOAc/Petroleum ether = 2/1);  $^1\text{H}$  NMR ( $\text{CDCl}_3$ , 500 MHz)  $\delta$  7.35-7.29 (m, 3H), 7.25 (d,  $J = 7.5$  Hz, 2H), 6.70 (s, 1H), 6.39 (s, 1H), 6.18 (q,  $J = 1.5$  Hz, 1H), 3.96 (d,  $J = 13.0$  Hz, 1H), 3.93 (d,  $J = 13.0$  Hz, 1H), 3.73 (s, 3H), 3.71 (s, 3H), 2.22 (s, 3H), 2.15 (d,  $J = 1.5$  Hz, 3H);  $^{13}\text{C}$  NMR ( $\text{CDCl}_3$ , 125 MHz)  $\delta$  151.6 (C), 149.3 (C), 149.0 ( $\text{C}_2$ ), 132.1 (CH), 130.5 ( $\text{CH}_2+\text{C}$ ), 128.7 ( $\text{CH}_2$ ), 128.1 (CH), 125.3 (C), 114.4 (CH), 111.4 (CH), 59.8 ( $\text{CH}_2$ ), 56.23 ( $\text{CH}_3$ ), 56.18 ( $\text{CH}_3$ ), 25.3 ( $\text{CH}_3$ ), 16.6 ( $\text{CH}_3$ ); IR (neat)  $\nu_{\text{max}} = 2953, 2849, 1501, 1465, 1455, 1395, 1375, 1211, 1035, 866, 813, 763, 700$   $\text{cm}^{-1}$ ; HRMS (ESI) calcd. for  $\text{C}_{19}\text{H}_{23}\text{O}_3\text{S}$   $[\text{M}+\text{H}]^+$ : 331.1368, found: 331.1368;  $[\alpha]_D^{20} = -200.0$  ( $c$  0.12,  $\text{CHCl}_3$ ); 82% ee [HPLC analysis, Daicel Chiralpak IA column, heptane/*i*-PrOH = 90:10, 1.0 mL/min, 217.2 nm,  $t_R = 11.6$  min and 14.0 min].

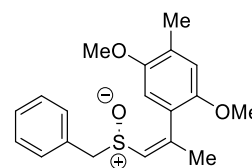

**II.5. (Z)-1,4-Dimethoxy-2-methyl-5-(1-(octylsulfinyl)prop-1-en-2-yl)benzene (Z-1g).** Compound **1g** was obtained with the use of **S1c** and **S2d** (1.0 mmol) as substrates. Colorless oil (157 mg, 44% yield); *E/Z* geometry of the double bond was assigned by NOESY analysis.  $R_f$  0.25 (EtOAc/Petroleum ether = 2/1);  $^1\text{H}$  NMR ( $\text{CDCl}_3$ , 500 MHz)  $\delta$  6.71 (s, 1H), 6.64 (s, 1H), 6.27 (s, 1H), 3.79 (s, 3H), 3.74 (s, 3H), 2.76 (dt,  $J = 13.0, 7.5$  Hz, 1H), 2.63 (dt,  $J$

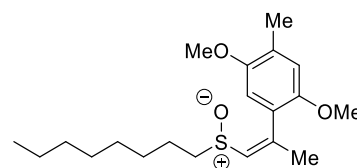

= 13.0, 8.0 Hz, 1H), 2.23 (s, 3H), 2.18 (s, 3H), 1.69-1.63 (m, 2H), 1.38-1.21 (m, 10H), 0.87 (t,  $J = 7.0$  Hz, 3H);  $^{13}\text{C}$  NMR ( $\text{CDCl}_3$ , 125 MHz)  $\delta$  151.7 (C), 149.5 (C), 148.8 (C), 132.7 (CH), 128.1 (C), 125.5 (C), 114.3 (CH), 111.5 (CH), 56.2 ( $\text{CH}_3$ ), 56.0 ( $\text{CH}_3$ ), 54.0 ( $\text{CH}_2$ ), 31.9 ( $\text{CH}_2$ ), 29.3 ( $\text{CH}_2$ ), 29.2 ( $\text{CH}_2$ ), 29.1 ( $\text{CH}_2$ ), 25.3 ( $\text{CH}_3$ ), 22.8 ( $\text{CH}_2$ ), 22.6 ( $\text{CH}_2$ ), 16.6 ( $\text{CH}_3$ ), 14.2 ( $\text{CH}_3$ ); IR (neat)  $\nu_{\text{max}} = 2926, 2854, 1504, 1465, 1397, 1375, 1213, 1040, 863, 811, 726$   $\text{cm}^{-1}$ ; HRMS (ESI) calcd. for  $\text{C}_{20}\text{H}_{33}\text{O}_3\text{S}$   $[\text{M}+\text{H}]^+$ : 353.2150, found: 353.2151.

**II.6. (Z)-2-((2-(2,5-Dimethoxy-4-methylphenyl)prop-1-en-1-yl)sulfinyl)-1,3,5-trimethylbenzene (Z-1h).** Compound **1h** was obtained with

the use of **S1d** and **S2d** (1.0 mmol) as substrates. Colorless oil (41.4 mg, 21% yield).  $R_f$  0.37 (EtOAc/Petroleum ether = 2/3);

$^1\text{H}$  NMR ( $\text{CDCl}_3$ , 500 MHz)  $\delta$  6.80 (bs, 3H), 6.69 (s, 1H), 6.65 (bs, 1H), 3.76 (s, 3H), 3.67 (s, 3H), 2.34 (s, 6H), 2.25 (s, 3H),

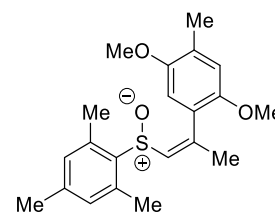

2.24 (s, 3H), 2.13 (s, 3H);  $^{13}\text{C}$  NMR ( $\text{CDCl}_3$ , 125 MHz)  $\delta$  151.5 (C), 149.5 (C), 140.8 (C), 138.6 ( $\text{C}_x2$ ), 136.8 (C), 131.5 (CH), 130.9 (C), 130.6 ( $\text{CH}_x2$ ), 127.7 (C), 125.4 (C), 114.1 (CH), 111.9 (CH), 56.1 ( $\text{CH}_3$ ), 55.9 ( $\text{CH}_3$ ), 25.1 ( $\text{CH}_3$ ), 21.2 ( $\text{CH}_3$ ), 19.2 ( $\text{CH}_3x2$ ), 16.6 ( $\text{CH}_3$ ); HRMS (ESI) calcd. for  $\text{C}_{21}\text{H}_{27}\text{O}_3\text{S}$   $[\text{M}+\text{H}]^+$ : 359.1681, found: 359.1668.

**B. Investigation of the catalytic reaction.**

In a 15 mL-reaction tube,  $\text{Au}(\text{Johnphos})\text{SbF}_6 \cdot \text{MeCN}$  (0.010 mmol, 10 mol%) and water (0.30 mmol, 5.4  $\mu\text{L}$ , 3.0 equiv) were added in 1,2-dichloroethane (0.5 mL). Then a solution of sulfoxides **1a-h** (0.10 mmol, 1.0 equiv) and propargyl-silane **2a-d** (0.15 mmol, 1.5 equiv) in 1,2-dichloroethane (1.5 mL) were added dropwise over 5 min, at room temperature. The reaction mixture was kept at 40  $^\circ\text{C}$  and when the reaction was completed, the solvent was evaporated and NMR yields were determined by using dibromomethane as internal standard. The major and minor products **3-5** were obtained by flash chromatography (2-10% EtOAc/Petroleum ether as eluent) or preparative TLC (10 % EtOAc/ Petroleum ether).

**II.7. (R)-2-(2-(2,5-Dimethoxy-4-methylphenyl)-2-methyl-4-oxopentanal ((R)-3a).**

Colorless oil (14.8 mg, 56% yield).  $R_f$  0.23 (EtOAc/Petroleum ether

= 1/5);  $^1\text{H}$  NMR ( $\text{CDCl}_3$ , 500 MHz)  $\delta$  9.52 (s, 1H), 6.74 (s, 1H), 6.71 (s, 1H), 3.81 (s, 3H), 3.74 (s, 3H), 3.15 (d,  $J = 16.0$  Hz, 1H),

3.04 (d,  $J = 16.0$  Hz, 1H), 2.21 (s, 3H), 1.96 (s, 3H), 1.50 (s, 3H);

$^{13}\text{C}$  NMR ( $\text{CDCl}_3$ , 125 MHz)  $\delta$  207.5 (C), 202.8 (CH), 151.2 (C), 150.2 (C), 127.4 (C), 127.3 (C), 114.5 (CH), 111.2 (CH), 56.4 ( $\text{CH}_3$ ), 56.0 ( $\text{CH}_3$ ), 50.3 (C), 48.3 ( $\text{CH}_2$ ), 31.5 ( $\text{CH}_3$ ), 20.0 ( $\text{CH}_3$ ), 16.3 ( $\text{CH}_3$ ); IR (neat)  $\nu_{\text{max}} = 2935, 2850, 1714, 1504, 1465, 1397,$

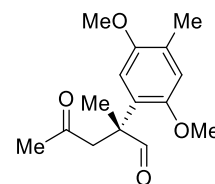

1375, 1359, 1211, 1181, 1041, 862  $\text{cm}^{-1}$ ; HRMS (ESI) calcd. for  $\text{C}_{15}\text{H}_{21}\text{O}_4$   $[\text{M}+\text{H}]^+$ : 265.1440, found: 265.1439;  $[\alpha]_D^{20} = -111.7$  ( $c$  0.6,  $\text{CHCl}_3$ ); 96% ee [HPLC analysis, Daicel Chiralpak IA column, heptane/*i*-PrOH = 80:20, 1.0 mL/min, 290.6 nm,  $t_R = 4.8$  min and 6.6 min].

**II.8. (S)-2-(2,5-Dimethoxy-4-methylphenyl)-2-methyl-4-oxopentanal ((S)-3a).** Colorless oil (18.5 mg, 70% yield).  $[\alpha]_D^{20} = 125.5$  ( $c$  0.55,  $\text{CHCl}_3$ ); 99% ee [HPLC analysis, Daicel Chiralpak IA column, heptane/*i*-PrOH = 80:20, 1.0 mL/min, 290.6 nm,  $t_R = 4.8$  min and 6.6 min].

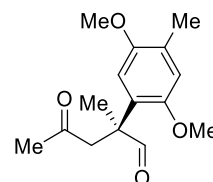

**II.9. (Z)-1-(2-((2-(2,5-Dimethoxy-4-methylphenyl)prop-1-en-1-yl)thio)-5-methylphenyl)propan-2-one (4a').** Colorless oil (16.5 mg, 44% yield).  $R_f$  0.28 (EtOAc/Petroleum ether = 1/50);  $^1\text{H}$  NMR ( $\text{CDCl}_3$ , 500 MHz)  $\delta$  7.39 (d,  $J = 8.0$  Hz, 1H), 7.05 (d,  $J = 8.0$  Hz, 1H), 6.95 (s, 1H), 6.76 (s, 1H), 6.66 (s, 1H), 6.05-6.01 (m, 1H), 3.80 (bs, 8H), 2.31 (s, 3H), 2.24 (s, 3H), 2.11 (s, 6H);  $^{13}\text{C}$  NMR ( $\text{CDCl}_3$ , 125 MHz)  $\delta$  206.4 (C), 151.7 (C), 150.1 (C), 137.5 (C), 137.2 (C), 135.8 (C), 132.9 (C), 132.4 (CH), 131.7 (CH), 128.9 (CH), 127.4 (C), 127.0 (C), 121.9 (CH), 114.9 (CH), 112.2 (CH), 56.4 ( $\text{CH}_3$ ), 56.2 ( $\text{CH}_3$ ), 49.0 ( $\text{CH}_2$ ), 29.7 ( $\text{CH}_3$ ), 24.6 ( $\text{CH}_3$ ), 21.1 ( $\text{CH}_3$ ), 16.5 ( $\text{CH}_3$ ); IR (neat)  $\nu_{\text{max}} = 2995, 2917, 2849, 1721, 1709, 1501, 1465, 1396, 1211, 1158, 1041, 808, 756$   $\text{cm}^{-1}$ ; HRMS (ESI) calcd. for  $\text{C}_{22}\text{H}_{27}\text{O}_3\text{S}$   $[\text{M}+\text{H}]^+$ : 371.1681, found: 371.1685.

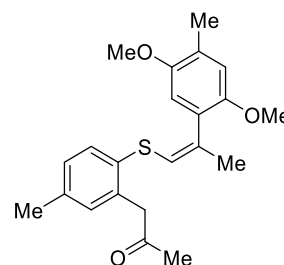

**II.10. (Z)-2-(2-(2,5-Dimethoxy-4-methylphenyl)prop-1-en-1-yl)(*p*-tolyl)sulfane ((Z)-5a).** Colorless oil (5.0 mg, 15% yield).  $R_f$  0.40 (EtOAc/Petroleum ether = 1/50);  $^1\text{H}$  NMR ( $\text{CDCl}_3$ , 500 MHz)  $\delta$  7.24 (d,  $J = 8.0$  Hz, 2H), 7.08 (d,  $J = 8.0$  Hz, 2H), 6.77 (s, 1H), 6.67 (s, 1H), 6.26-6.23 (m, 1H), 3.80 (s, 6H), 2.31 (s, 3H), 2.24 (s, 3H), 2.16 (d,  $J = 1.0$  Hz, 3H);  $^{13}\text{C}$  NMR ( $\text{CDCl}_3$ , 125 MHz)  $\delta$  151.7 (C), 150.1 (C), 137.3 (C), 136.1 (C), 133.8 (C), 129.7 ( $\text{CH}_2$ ), 129.3 ( $\text{CH}_2$ ), 127.7 (C), 126.9 (C), 121.3 (CH), 115.2 (CH), 112.1 (CH), 56.7 ( $\text{CH}_3$ ), 56.2 ( $\text{CH}_3$ ), 24.8 ( $\text{CH}_3$ ), 21.1 ( $\text{CH}_3$ ), 16.5 ( $\text{CH}_3$ ); IR (neat)  $\nu_{\text{max}} = 3002, 2920, 2849, 1501, 1493, 1465, 1396, 1210, 1043, 1017, 864, 803, 753, 667$   $\text{cm}^{-1}$ ; HRMS (ESI) calcd for  $\text{C}_{19}\text{H}_{23}\text{O}_2\text{S}$   $[\text{M}+\text{H}]^+$ : 315.1419, found: 315.1422.

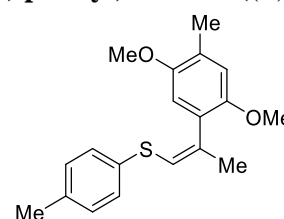

**II.11. (*E*)-2-(2,5-Dimethoxy-4-methylphenyl)prop-1-en-1-yl(*p*-tolyl)sulfane ((*E*)-5a).** Colorless oil (6.5 mg, 21% yield).  $R_f$  0.42

(EtOAc/Petroleum ether = 1/50);  $^1\text{H NMR}$  ( $\text{CDCl}_3$ , 500 MHz)  $\delta$  7.31 (d,  $J = 8.0$  Hz, 2H), 7.12 (d,  $J = 8.0$  Hz, 2H), 6.71 (s, 1H), 6.67 (s, 1H), 6.35 (s, 1H), 3.79 (s, 3H), 3.78 (s, 3H),

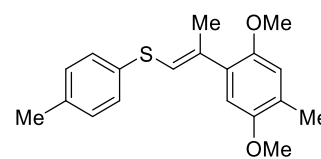

2.33 (s, 3H), 2.22 (s, 3H), 2.18 (s, 3H);  $^{13}\text{C NMR}$  ( $\text{CDCl}_3$ , 125 MHz)  $\delta$  151.7 (C), 150.5 (C), 136.6 (C), 136.3 (C), 133.1 (C), 130.4 (C), 129.9 (CH<sub>2</sub>), 129.3 (CH<sub>2</sub>), 126.5 (C), 123.2 (CH), 114.9 (CH), 112.1 (CH), 56.5 (CH<sub>3</sub>), 56.3 (CH<sub>3</sub>), 21.2 (CH<sub>3</sub>), 19.3 (CH<sub>3</sub>), 16.3 (CH<sub>3</sub>); IR (neat)  $\nu_{\text{max}} = 2920, 2848, 2828, 1493, 1463, 1395, 1373, 1207, 1179, 1043, 1004, 805, 756, 674$   $\text{cm}^{-1}$ ; HRMS (ESI) calcd. for  $\text{C}_{19}\text{H}_{23}\text{O}_2\text{S}$   $[\text{M}+\text{H}]^+$ : 315.1419, found: 315.1413.

**II.12. (*R*)-2-(Naphthalen-1-yl)-4-oxo-2-propylpentanal ((*R*)-3b).** Colorless oil (10.5 mg, 39% yield).  $R_f$  0.30 (EtOAc/Petroleum ether = 1/5);  $^1\text{H NMR}$

( $\text{CDCl}_3$ , 300 MHz)  $\delta$  9.99 (s, 1H), 7.93-7.88 (m, 1H), 7.83 (d,  $J = 7.8$  Hz, 1H), 7.80-7.75 (m, 1H), 7.52-7.42 (m, 4H), 3.54 (d,  $J = 17.1$  Hz, 1H), 3.36 (d,  $J = 17.1$  Hz, 1H), 2.44 (ddd,  $J = 14.1, 12.6,$

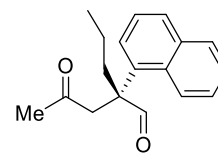

4.8 Hz, 1H), 2.14 (ddd,  $J = 13.8, 12.3, 4.5$  Hz, 1H), 1.94 (s, 3H), 1.26-1.17 (m, 1H), 1.11-1.02 (m, 1H), 0.88 (t,  $J = 7.2$  Hz, 3H);  $^{13}\text{C NMR}$  ( $\text{CDCl}_3$ , 75 MHz)  $\delta$  206.5 (C), 205.4 (CH), 135.2 (C), 135.0 (C), 131.2 (C), 130.0 (CH), 129.2 (CH), 126.6 (CH), 126.4 (CH), 125.6 (CH), 125.3 (CH), 124.3 (CH), 56.3 (C), 48.8 (CH<sub>2</sub>), 36.2 (CH<sub>2</sub>), 31.0 (CH<sub>3</sub>), 17.5 (CH<sub>2</sub>), 14.6 (CH<sub>3</sub>); IR (neat)  $\nu_{\text{max}} = 2960, 2932, 2872, 1712, 1600, 1511, 1466, 1415, 1398, 1361, 1186, 1170, 803, 778$   $\text{cm}^{-1}$ ; HRMS (ESI) calcd. for  $\text{C}_{18}\text{H}_{21}\text{O}_2$   $[\text{M}+\text{H}]^+$ : 269.1542, found: 269.1541;  $[\alpha]_D^{20} = -104.0$  ( $c$  0.35,  $\text{CHCl}_3$ ); 96% ee [HPLC analysis, Daicel Chiralpak IC column, heptane/*i*-PrOH = 80:20, 1.0 mL/min, 281.1 nm,  $t_R = 7.6$  min and 11.8 min].

**II.13. (*E*)-1-(5-Methyl-2-((2-(naphthalen-1-yl)pent-1-en-1-yl)thio)phenyl)-3-(triisopropylsilyl)propan-2-one ((*E*)-4b).** Brown oil (16.5 mg, 31% yield).  $R_f$  0.35 (EtOAc/Petroleum ether = 1/50);  $^1\text{H NMR}$

( $\text{CDCl}_3$ , 500 MHz)  $\delta$  8.02-7.99 (m, 1H), 7.86-7.83 (m, 1H), 7.76 (d,  $J = 8.0$  Hz, 1H), 7.51-7.46 (m, 2H), 7.42 (t,  $J = 7.5$  Hz, 1H), 7.36 (d,  $J = 8.0$  Hz, 1H), 7.28 (d,  $J = 7.0$  Hz, 1H),

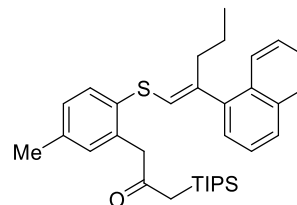

7.01 (d,  $J = 8.0$  Hz, 1H), 6.99 (bs, 1H), 6.13 (s, 1H), 3.99 (s, 2H), 2.75 (t,  $J = 7.5$  Hz, 2H), 2.35 (s, 2H), 2.28 (s, 3H), 1.47-1.38 (m, 2H), 1.27-1.19 (m, 3H), 1.14 (d,  $J = 7.0$  Hz, 18H), 0.93 (t,  $J = 7.5$  Hz, 3H);  $^{13}\text{C NMR}$  ( $\text{CDCl}_3$ , 75 MHz)  $\delta$  207.3 (C), 142.3 (C), 140.9 (C), 137.3 (C), 135.5 (C), 133.9 (C), 132.5 (C), 131.8 (C), 131.6 (CH), 131.5 (CH), 128.9 (CH), 128.5 (CH), 127.6 (CH), 126.0 (CH), 125.91 (CH), 125.88 (CH), 125.82 (CH), 125.3 (CH), 124.9 (CH), 50.2 (CH<sub>2</sub>), 36.9 (CH<sub>2</sub>), 29.6 (CH<sub>2</sub>), 21.6 (CH<sub>2</sub>),

21.1 (CH<sub>3</sub>), 18.8 (CH<sub>3</sub>x6), 14.2 (CH<sub>3</sub>), 11.7 (CHx3); IR (neat)  $\nu_{\max}$  = 2942, 2891, 2866, 1694, 1463, 1232, 1107, 1044, 883, 794, 776, 758 cm<sup>-1</sup>; HRMS (ESI) calcd. for C<sub>34</sub>H<sub>47</sub>OSSi [M+H]<sup>+</sup>: 531.3117, found: 531.3118.

**II.14. (E)-(2-(Naphthalen-1-yl)pent-1-en-1-yl)(p-tolyl)sulfane ((E)-5b).** Brown oil (4.0 mg, 12% yield).  $R_f$  0.43 (EtOAc/Petroleum ether = 1/50);

<sup>1</sup>H NMR (CDCl<sub>3</sub>, 500 MHz)  $\delta$  8.03 (d,  $J$  = 8.0 Hz, 1H), 7.87-7.84 (m, 1H), 7.77 (d,  $J$  = 8.0 Hz, 1H), 7.51-7.46 (m, 2H), 7.43 (t,  $J$  = 7.0 Hz, 1H), 7.31-7.19 (m, 3H), 7.10 (d,  $J$  = 8.0 Hz, 2H),

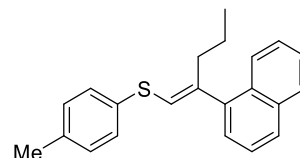

6.28 (s, 1H), 2.75 (t,  $J$  = 7.5 Hz, 2H), 2.31 (s, 3H), 1.42 (sx,  $J$  = 7.5 Hz, 2H), 0.93 (t,  $J$  = 7.5 Hz, 3H); <sup>13</sup>C NMR (CDCl<sub>3</sub>, 125 MHz)  $\delta$  142.6 (C), 140.9 (C), 136.5 (C), 133.9 (C), 132.9 (C), 131.8 (C), 129.9 (CHx2), 129.4 (CHx2), 128.5 (CH), 127.6 (CH), 126.03 (CH), 125.97 (CH), 125.9 (CH), 125.8 (CH), 125.4 (CH), 124.2 (CH), 37.0 (CH<sub>2</sub>), 21.6 (CH<sub>2</sub>), 21.1 (CH<sub>3</sub>), 14.2 (CH<sub>3</sub>); IR (neat)  $\nu_{\max}$  = 3039, 2958, 2928, 2869, 1738, 1491, 1455, 1393, 1216, 1091, 1017, 793, 775, 756 cm<sup>-1</sup>; HRMS (ESI) calcd. for C<sub>22</sub>H<sub>23</sub>S [M+H]<sup>+</sup>: 319.1520, found: 319.1512.

**II.15. 2-Methyl-4-oxo-2-(2,4,5-trimethylphenyl)pentanal (3c).** Colorless oil (4.3 mg, 18% yield).  $R_f$  0.41 (EtOAc/Petroleum ether = 1/10); <sup>1</sup>H NMR

(CDCl<sub>3</sub>, 500 MHz)  $\delta$  9.65 (s, 1H), 6.99 (s, 1H), 6.95 (s, 1H), 3.13 (d,  $J$  = 16.2 Hz, 1H), 3.07 (d,  $J$  = 16.2 Hz, 1H), 2.24 (s, 3H), 2.21 (s, 3H), 2.20 (s, 3H), 1.97 (s, 3H), 1.56 (s, 3H); <sup>13</sup>C NMR (CDCl<sub>3</sub>, 125

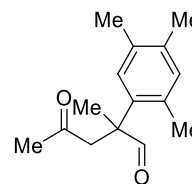

MHz)  $\delta$  206.9 (C), 203.2 (CH), 136.3 (C), 135.1 (C), 134.6 (C), 134.1 (CH), 133.1 (C), 128.9 (CH), 52.6 (C), 49.3 (CH<sub>2</sub>), 31.4 (CH<sub>3</sub>), 21.3 (CH<sub>3</sub>), 20.9 (CH<sub>3</sub>), 19.7 (CH<sub>3</sub>), 19.2 (CH<sub>3</sub>); HRMS (ESI) calcd. for C<sub>15</sub>H<sub>21</sub>O<sub>2</sub> [M+H]<sup>+</sup>: 233.1542, found: 233.1539.

**II.16. (Z)-1-(5-Methyl-2-((2-(2,4,5-trimethylphenyl)prop-1-en-1-yl)thio)phenyl)-3-(triisopropylsilyl)propan-2-one ((Z)-4c).** Colorless oil (20.7

mg, 42% yield).  $R_f$  0.63 (EtOAc/Petroleum ether = 1/40); <sup>1</sup>H NMR (CDCl<sub>3</sub>, 500 MHz)  $\delta$  7.34 (d,  $J$  = 7.9 Hz, 1H), 7.04 (d,  $J$  = 7.9 Hz, 1H), 6.99 (s, 1H), 6.95 (s, 1H), 6.84 (s, 1H), 6.05 (s, 1H), 3.83 (s, 2H), 2.29 (s, 3H), 2.24 (s, 3H), 2.23 (s, 6H), 2.21 (s, 2H), 2.03 (s, 3H), 1.17-1.08 (m, 3H), 1.05 (d,  $J$  = 6.7 Hz,

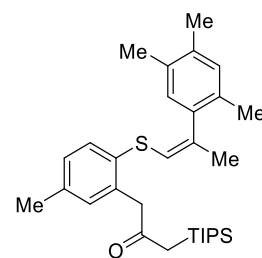

18H); <sup>13</sup>C NMR (CDCl<sub>3</sub>, 125 MHz)  $\delta$  207.6 (C), 138.6 (C), 138.3 (C), 137.1 (C), 135.6 (C), 135.5 (C), 134.0 (C), 132.9 (C), 132.1 (C), 131.70 (CH), 131.66 (CH), 131.5 (CH), 129.0 (CH), 128.7 (CH), 121.8 (CH), 49.8 (CH<sub>2</sub>), 29.6 (CH<sub>2</sub>), 25.6 (CH<sub>3</sub>), 21.1 (CH<sub>3</sub>), 19.6 (CH<sub>3</sub>), 19.5 (CH<sub>3</sub>), 18.74 (CH<sub>3</sub>), 18.68 (CH<sub>3</sub>x6), 11.6 (CHx3); HRMS (ESI) calcd. for C<sub>31</sub>H<sub>47</sub>OSSi [M+H]<sup>+</sup>: 495.3117, found: 495.3111.



**II.17. (Z)-p-Tolyl(2-(2,4,5-trimethylphenyl)prop-1-en-1-yl)sulfane ((Z)-5c).**

Colorless oil (2.7 mg, 10% yield).  $R_f$  0.37 (100% Petroleum ether);  $^1\text{H}$  NMR ( $\text{CDCl}_3$ , 500 MHz)  $\delta$  7.22 (d,  $J = 7.9$  Hz, 2H), 7.09 (d,  $J = 7.9$  Hz, 2H), 7.01 (s, 1H), 6.86 (s, 1H), 6.22 (s, 1H), 2.31 (s, 3H), 2.23 (s, 6H), 2.20-2.23 (m, 3H), 2.07 (s, 3H);  $^{13}\text{C}$  NMR ( $\text{CDCl}_3$ , 75 MHz)  $\delta$  139.2 (C), 138.4 (C), 136.1 (C), 135.7 (C), 134.1 (C), 133.6 (C), 132.0 (C), 131.7 (CH), 129.8 ( $\text{CH}_2$ ), 129.2 ( $\text{CH}_2$ ), 129.0 (CH), 121.0 (CH), 25.6 ( $\text{CH}_3$ ), 21.1 ( $\text{CH}_3$ ), 19.6 ( $\text{CH}_3$ ), 19.4 ( $\text{CH}_3$ ), 18.7 ( $\text{CH}_3$ ); HRMS (ESI) calcd. for  $\text{C}_{19}\text{H}_{23}\text{S}$   $[\text{M}+\text{H}]^+$ : 283.1520, found: 283.1514.

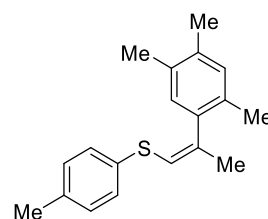

**II.18. (E)-1-(5-Methyl-2-((2-phenylpent-1-en-1-yl)thio)phenyl)-3-(triisopropylsilyl)propan-2-one ((E)-4d).**

Colorless oil (6.0 mg, 13% yield).  $R_f$  0.21 (EtOAc/Petroleum ether = 1/50);  $^1\text{H}$  NMR ( $\text{CDCl}_3$ , 500 MHz)  $\delta$  7.36 (d,  $J = 8.0$  Hz, 1H), 7.34 (d,  $J = 8.0$  Hz, 2H), 7.30 (t,  $J = 7.5$  Hz, 2H), 7.22 (t,  $J = 7.0$  Hz, 1H), 7.04 (d,  $J = 8.0$  Hz, 1H), 7.01 (bs, 1H), 6.30 (s, 1H), 3.97 (s, 2H), 2.70 (t,  $J = 7.5$  Hz, 2H), 2.31 (s, 3H), 2.30 (s, 2H), 1.55-1.47 (m, 2H), 1.22-1.15 (m, 3H), 1.10 (d,  $J = 7.0$  Hz, 18H), 0.95 (t,  $J = 7.5$  Hz, 3H);  $^{13}\text{C}$  NMR ( $\text{CDCl}_3$ , 125 MHz)  $\delta$  207.3 (C), 141.2 (C), 137.6 (C), 136.0 (C), 132.5 (C), 132.2 (CH), 131.7 (CH), 128.9 (CH), 128.5 ( $\text{CH}_2+\text{C}$ ), 127.1 (CH), 126.0 ( $\text{CH}_2$ ), 123.7 (CH), 50.2 ( $\text{CH}_2$ ), 33.7 ( $\text{CH}_2$ ), 29.7 ( $\text{CH}_2$ ), 21.6 ( $\text{CH}_2$ ), 21.2 ( $\text{CH}_3$ ), 18.7 ( $\text{CH}_3 \times 6$ ), 14.1 ( $\text{CH}_3$ ), 11.7 ( $\text{CH}_3 \times 3$ ); IR (neat)  $\nu_{\text{max}} = 2941, 2891, 2866, 1694, 1463, 1443, 1233, 1192, 1106, 1043, 1017, 999, 882, 809, 752, 696 \text{ cm}^{-1}$ ; HRMS (ESI) calcd. for  $\text{C}_{30}\text{H}_{45}\text{OSSi}$   $[\text{M}+\text{H}]^+$ : 481.2960, found: 481.2957.

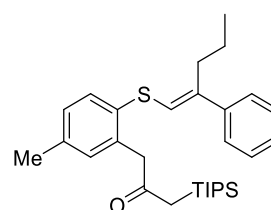

**II.19. (E)-(2-Phenylpent-1-en-1-yl)(p-tolyl)sulfane ((E)-5d).**

Colorless oil (4.0 mg, 14% yield).  $R_f$  0.18 (Pure petroleum ether);  $^1\text{H}$  NMR ( $\text{CDCl}_3$ , 500 MHz)  $\delta$  7.38 (d,  $J = 7.5$  Hz, 2H), 7.34-7.30 (m, 4H), 7.25 (t,  $J = 7.5$  Hz, 1H), 7.13 (d,  $J = 8.0$  Hz, 2H), 6.46 (s, 1H), 2.71 (t,  $J = 7.5$  Hz, 2H), 2.34 (s, 3H), 1.50 (sx,  $J = 7.5$  Hz, 2H), 0.96 (t,  $J = 7.0$  Hz, 3H);  $^{13}\text{C}$  NMR ( $\text{CDCl}_3$ , 125 MHz)  $\delta$  142.0 (C), 141.4 (C), 136.6 (C), 133.0 (C), 130.0 ( $\text{CH}_2$ ), 129.6 ( $\text{CH}_2$ ), 128.5 ( $\text{CH}_2$ ), 127.2 (CH), 126.1 ( $\text{CH}_2$ ), 122.7 (CH), 33.9 ( $\text{CH}_2$ ), 21.6 ( $\text{CH}_2$ ), 21.2 ( $\text{CH}_3$ ), 14.1 ( $\text{CH}_3$ ); IR (neat)  $\nu_{\text{max}} = 2957, 2926, 2869, 1491, 1455, 1441, 1091, 1017, 821, 803, 752, 695 \text{ cm}^{-1}$ ; HRMS (ESI) calcd. for  $\text{C}_{18}\text{H}_{21}\text{S}$   $[\text{M}+\text{H}]^+$ : 269.1364, found: 269.1366.

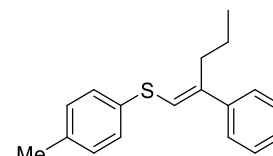

**II.20. (Z)-1-(5-Methyl-2-((2-phenylpent-1-en-1-yl)thio)phenyl)-3-**

**(triisopropylsilyl)propan-2-one ((Z)-4d).** Colorless oil (6.0 mg, 12% yield).  $R_f$  0.12 (EtOAc/Petroleum ether = 1/50);  $^1\text{H}$  NMR ( $\text{CDCl}_3$ , 300 MHz)  $\delta$  7.37-7.28 (m, 6H), 7.05 (dd,  $J = 1.5$  Hz,  $J = 7.5$  Hz, 1H), 6.97 (d,  $J = 1.2$  Hz, 1H), 6.02 (t,  $J = 1.2$  Hz, 1H), 3.86 (s, 2H), 2.44 (dt,  $J = 7.5$ , 0.9 Hz, 2H), 2.30

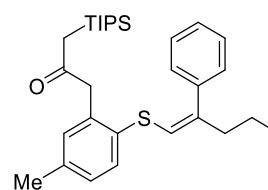

(s, 3H), 2.21 (s, 2H), 1.41-1.33 (m, 2H), 1.17-1.12 (m, 3H), 1.06 (d,  $J = 5.7$  Hz, 18H), 0.87 (t,  $J = 7.2$  Hz, 3H);  $^{13}\text{C}$  NMR ( $\text{CDCl}_3$ , 125 MHz)  $\delta$  207.5 (C), 141.6 (C), 139.8 (C), 137.6 (C), 136.1 (C), 133.0 (C), 132.4 (CH), 131.6 (CH), 128.8 (CH), 128.3 (CH<sub>x</sub>2), 128.2 (CH<sub>x</sub>2), 127.4 (CH), 122.0 (CH), 49.9 (CH<sub>2</sub>), 41.0 (CH<sub>2</sub>), 29.7 (CH<sub>2</sub>), 21.7 (CH<sub>2</sub>), 21.2 (CH<sub>3</sub>), 18.7 (CH<sub>3</sub>x6), 13.7 (CH<sub>3</sub>), 11.6 (CH<sub>x</sub>3); IR (neat)  $\nu_{\text{max}} = 2928$ , 2867, 1694, 1464, 1232, 1044, 883, 808, 699  $\text{cm}^{-1}$ ; HRMS (ESI)  $m/z$ :  $[\text{M}+\text{H}]^+$  Calcd for  $\text{C}_{30}\text{H}_{45}\text{OSSi}$  481.2960; Found 481.2968.

**II.21. (Z)-(2-Phenylpent-1-en-1-yl)(p-tolyl)sulfane ((Z)-5d).** Colorless oil (3.0 mg, 11% yield).  $R_f$  0.59 (EtOAc/Petroleum ether = 1/50);  $^1\text{H}$  NMR

( $\text{CDCl}_3$ , 300 MHz)  $\delta$  7.41-7.28 (m, 5H), 7.25 (d,  $J = 8.1$  Hz, 2H), 7.10 (d,  $J = 7.8$  Hz, 2H), 6.22 (t,  $J = 0.9$  Hz, 1H), 2.49 (dt,  $J = 7.5$ , 0.9 Hz, 2H), 2.32 (s, 3H), 1.40 (sx,  $J = 7.5$  Hz, 2H),

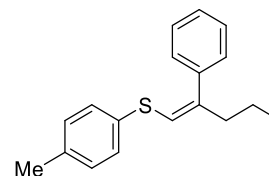

0.90 (t,  $J = 7.2$  Hz, 3H);  $^{13}\text{C}$  NMR ( $\text{CDCl}_3$ , 75 MHz)  $\delta$  142.3 (C), 140.0 (C), 136.4 (C), 133.7 (C), 129.9 (CH<sub>x</sub>2), 129.6 (CH<sub>x</sub>2), 128.3 (CH<sub>x</sub>2), 128.2 (CH<sub>x</sub>2), 127.5 (CH), 121.0 (CH), 41.1 (CH<sub>2</sub>), 21.6 (CH<sub>2</sub>), 21.2 (CH<sub>3</sub>), 13.7 (CH<sub>3</sub>); IR (neat)  $\nu_{\text{max}} = 3020$ , 2958, 2927, 2870, 1492, 1456, 1441, 1092, 1018, 804, 699  $\text{cm}^{-1}$ ; HRMS (ESI)  $m/z$ :  $[\text{M}+\text{H}]^+$  Calcd for  $\text{C}_{18}\text{H}_{21}\text{S}$  269.1364; Found 269.1354.

**II.22. 2-Methyl-4-oxo-2-phenylpentanal (3e).** Colorless oil (7.8 mg, 41% yield).  $R_f$

0.28 (EtOAc/Petroleum ether = 1/5);  $^1\text{H}$  NMR ( $\text{CDCl}_3$ , 500 MHz)  $\delta$  9.49 (s, 1H), 7.31 (t, d,  $J = 7.5$  Hz, 2H), 7.23-7.18 (m, 3H), 3.10 (d,  $J = 17.5$  Hz, 1H), 3.00 (d,  $J = 17.5$  Hz, 1H), 2.01 (s, 3H), 1.54 (s, 3H);  $^{13}\text{C}$  NMR

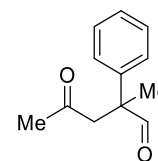

( $\text{CDCl}_3$ , 125 MHz)  $\delta$  206.2 (C), 201.2 (CH), 139.3 (C), 129.1 (CH<sub>x</sub>2), 127.6 (CH), 127.0 (CH<sub>x</sub>2), 52.0 (C), 50.6 (CH<sub>2</sub>), 31.1 (CH<sub>3</sub>), 20.0 (CH<sub>3</sub>); HRMS (ESI) calcd.  $\text{C}_{12}\text{H}_{15}\text{O}_2$  for  $[\text{M}+\text{H}]^+$ : 191.1072, found: 191.1064.

**II.23. (Z)-1-(5-Methyl-2-((2-phenylprop-1-en-1-yl)thio)phenyl)-3-**

**(triisopropylsilyl)propan-2-one ((Z)-4e).** Colorless oil (2.4 mg, 5% yield).  $R_f$  0.29 (EtOAc/Petroleum ether = 1/40);  $^1\text{H}$  NMR ( $\text{CDCl}_3$ , 500 MHz)  $\delta$  7.42-7.34 (m, 5H), 7.28 (d,  $J = 7.0$  Hz, 1H), 7.05 (d,  $J = 7.9$  Hz, 1H), 6.98 (s, 1H), 6.05 (s, 1H), 3.88 (s, 2H), 2.30 (s, 3H), 2.22 (s, 2H), 2.15 (s, 3H), 1.18-1.10 (m, 3H), 1.06

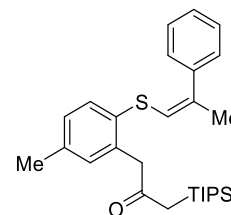

(d,  $J = 6.7$  Hz, 18H);  $^{13}\text{C}$  NMR ( $\text{CDCl}_3$ , 125 MHz)  $\delta$  207.5 (C), 140.4 (C), 137.7 (C), 136.2 (Cx2), 132.9 (C), 132.6 (CH), 131.6 (CH), 128.8 (CH), 128.2 (CHx2), 127.7 (CHx2), 127.4 (CH), 122.3 (CH), 50.0 ( $\text{CH}_2$ ), 29.7 ( $\text{CH}_2$ ), 25.1 ( $\text{CH}_3$ ), 21.2 ( $\text{CH}_3$ ), 18.7 ( $\text{CH}_3$ x6), 11.6 ( $\text{CH}_3$ x3); HRMS (ESI) calcd. for  $\text{C}_{28}\text{H}_{41}\text{OSSi}$   $[\text{M}+\text{H}]^+$ : 453.2647, found: 453.2654.

**II.24. (Z)-(2-Phenylprop-1-en-1-yl)(p-tolyl)sulfane ((Z)-5e).** Colorless oil (2.0 mg, 8% yield).  $R_f$  0.50 (100% Petroleum ether);  $^1\text{H}$  NMR ( $\text{CDCl}_3$ , 500 MHz)  $\delta$  7.34–7.28 (m, 4H), 7.24–7.19 (m, 3H), 7.04 (d,  $J = 7.9$  Hz, 2H), 6.16 (s, 1H), 2.25 (s, 3H), 2.13 (s, 3H);  $^{13}\text{C}$  NMR ( $\text{CDCl}_3$ , 125 MHz)  $\delta$  140.5 (C), 137.1 (C), 136.6 (C), 133.5 (C), 129.9 ( $\text{CH}_2$ ), 129.6 ( $\text{CH}_2$ ), 128.3 ( $\text{CH}_2$ ), 127.8 ( $\text{CH}_2$ ), 127.5 (CH), 121.1 (C), 25.2 ( $\text{CH}_3$ ), 21.2 ( $\text{CH}_3$ ); HRMS (ESI) calcd. for  $\text{C}_{16}\text{H}_{17}\text{S}$   $[\text{M}+\text{H}]^+$ : 241.1051, found: 241.1053.

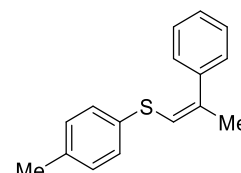

### III. NMR Spectra ( $^1\text{H}$ NMR and $^{13}\text{C}$ NMR):

#### III.1. (Z)-1c

$^1\text{H}$  NMR ( $\text{CDCl}_3$ , 500 MHz)

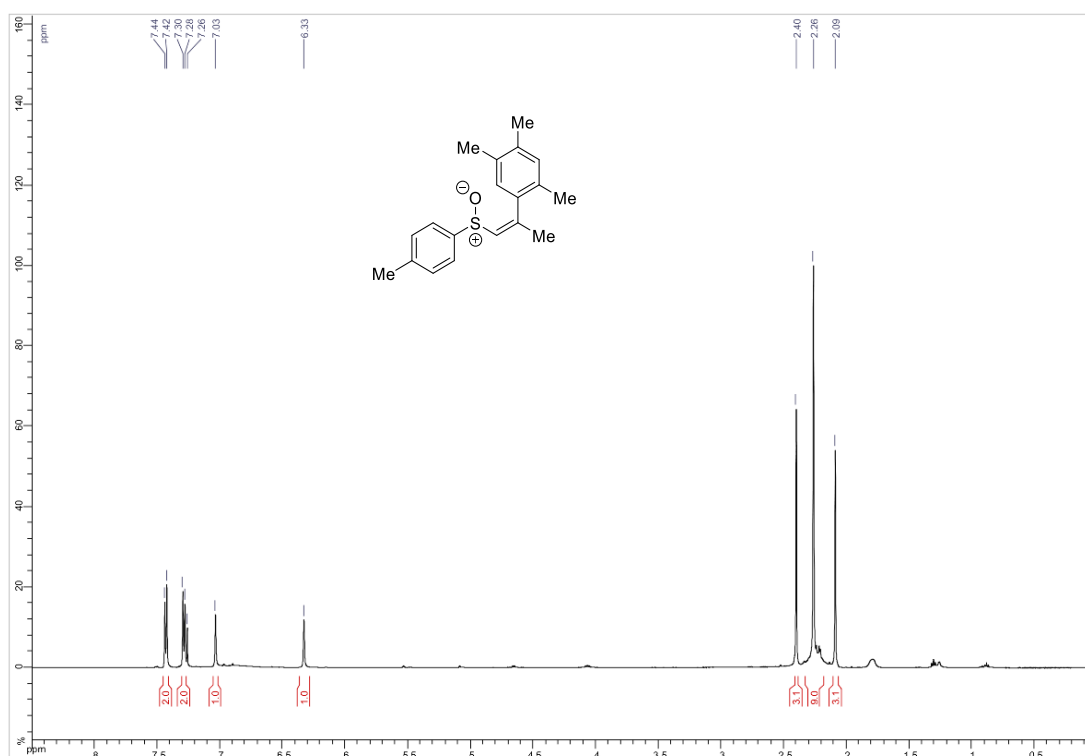

$^{13}\text{C}$  NMR ( $\text{CDCl}_3$ , 125 MHz)

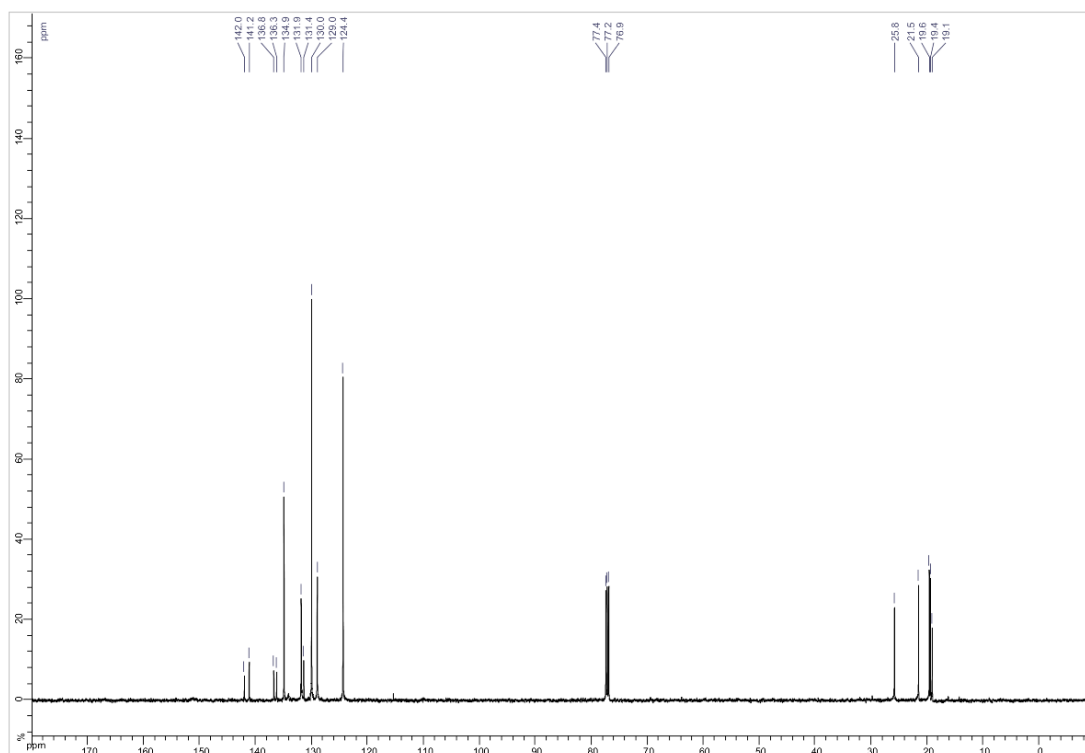

### III.2. (Z)-1d

$^1\text{H}$  NMR ( $\text{CDCl}_3$ , 500 MHz)

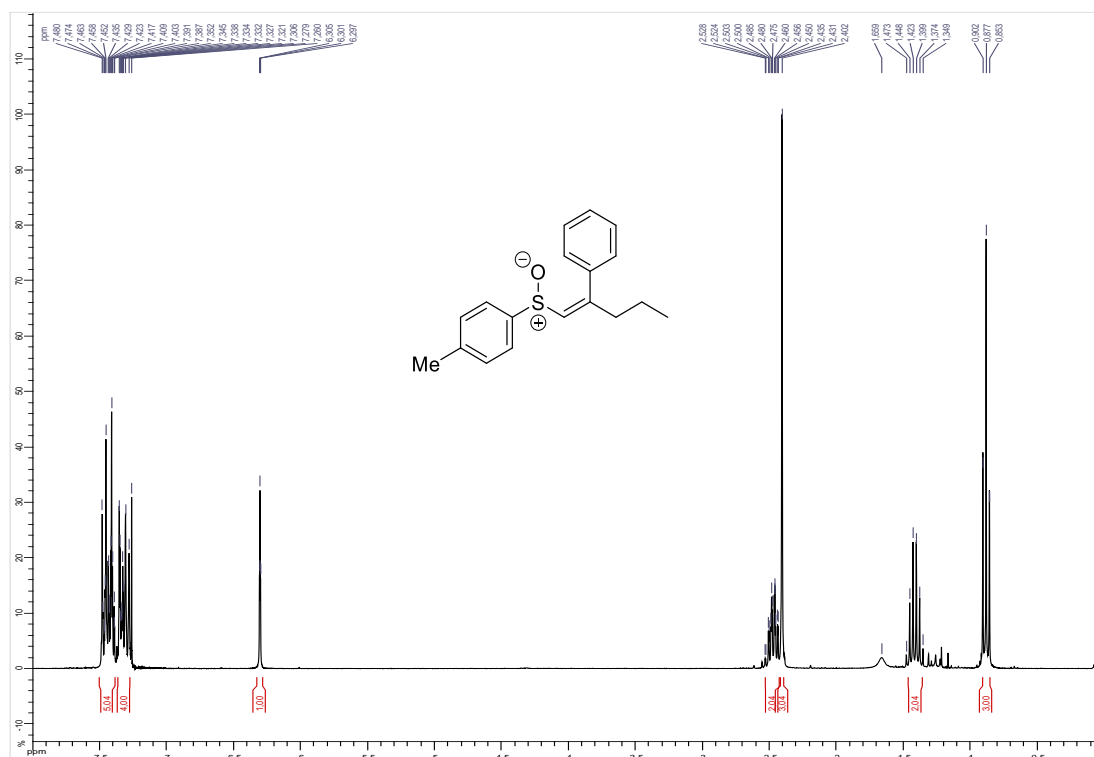

$^{13}\text{C}$  NMR ( $\text{CDCl}_3$ , 75 MHz)

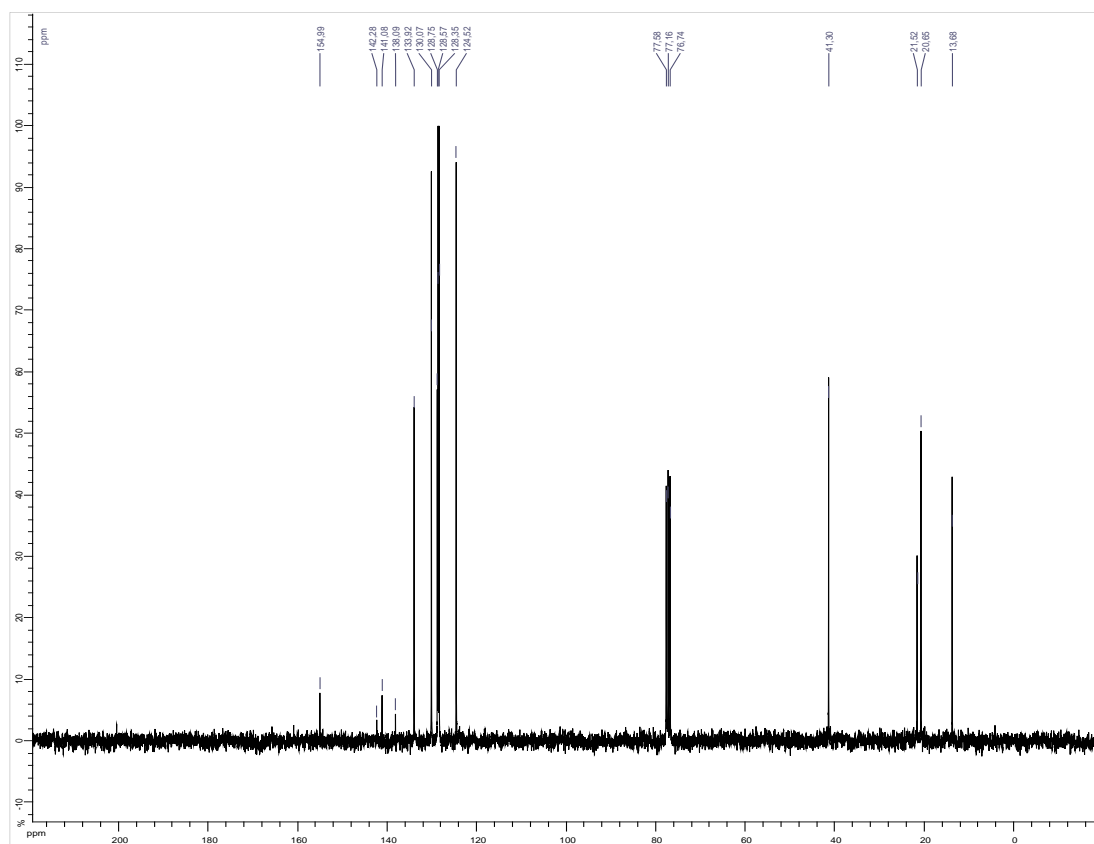

### III.3. (Z)-1e

$^1\text{H}$  NMR ( $\text{CDCl}_3$ , 500 MHz)

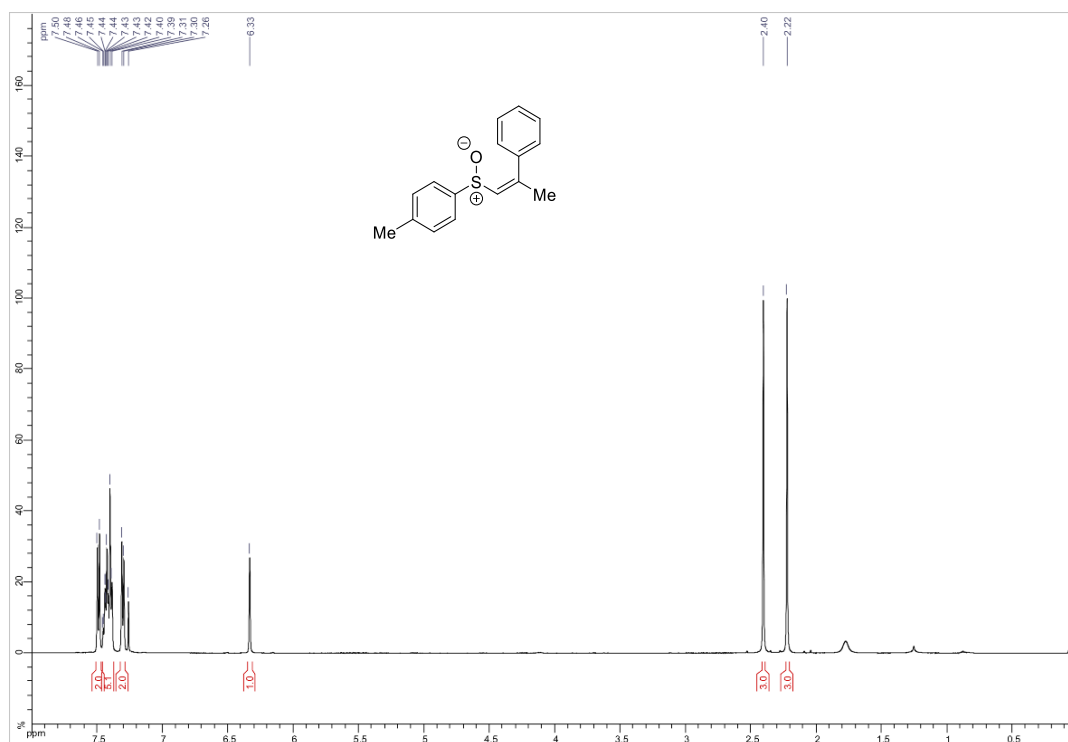

$^{13}\text{C}$  NMR ( $\text{CDCl}_3$ , 125 MHz)

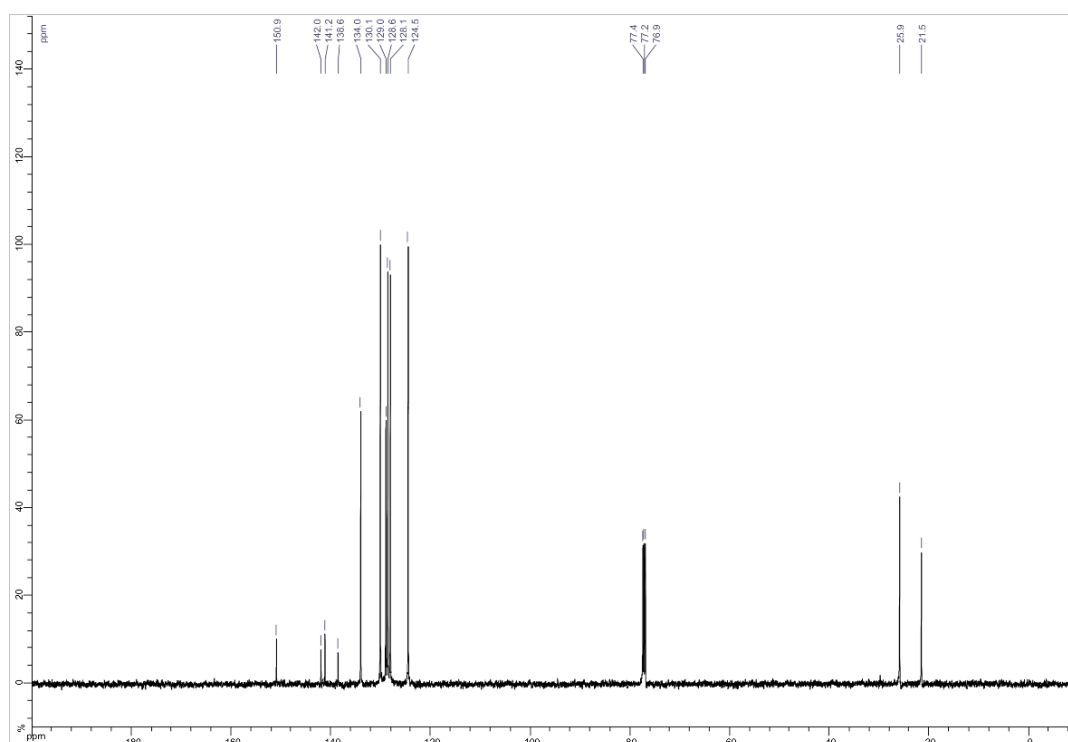

### III.4. (S,Z)-1f.

$^1\text{H}$  NMR ( $\text{CDCl}_3$ , 500 MHz)

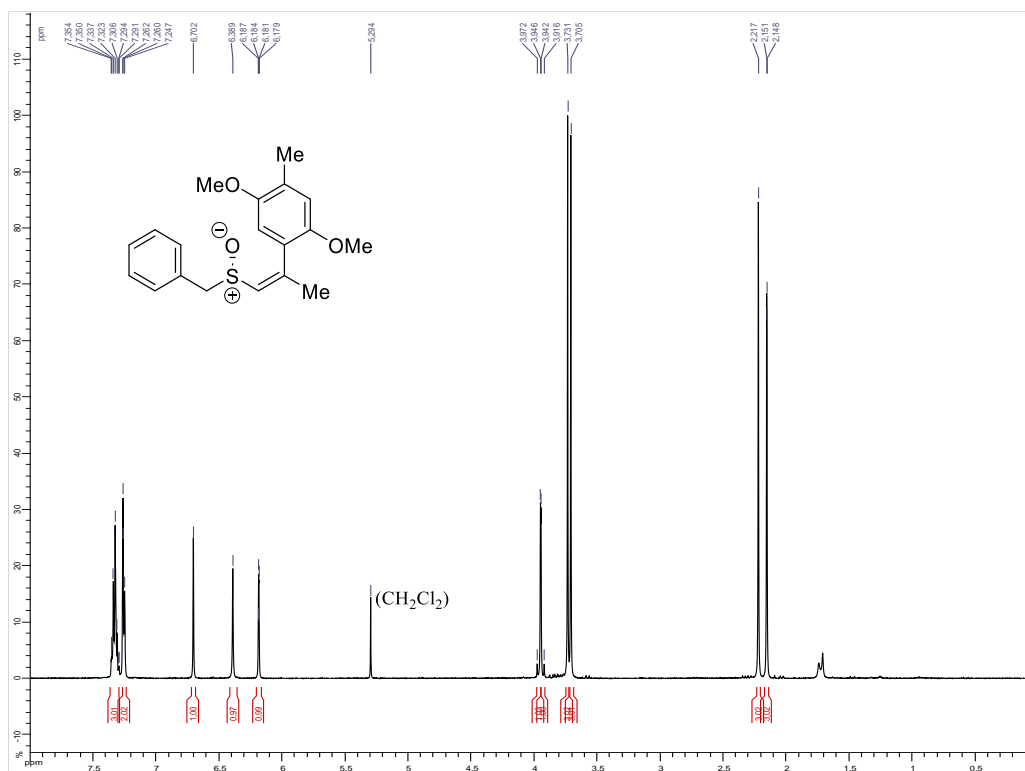

$^{13}\text{C}$  NMR ( $\text{CDCl}_3$ , 125 MHz)

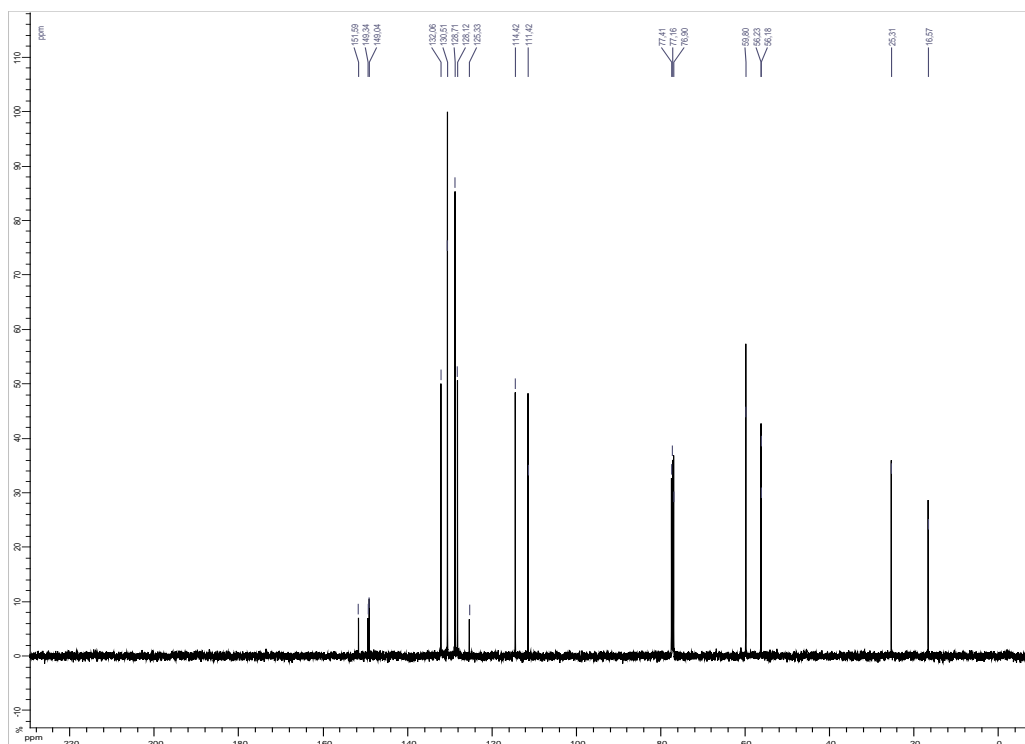

### III.5. (Z)-1g.

$^1\text{H}$  NMR ( $\text{CDCl}_3$ , 500 MHz)

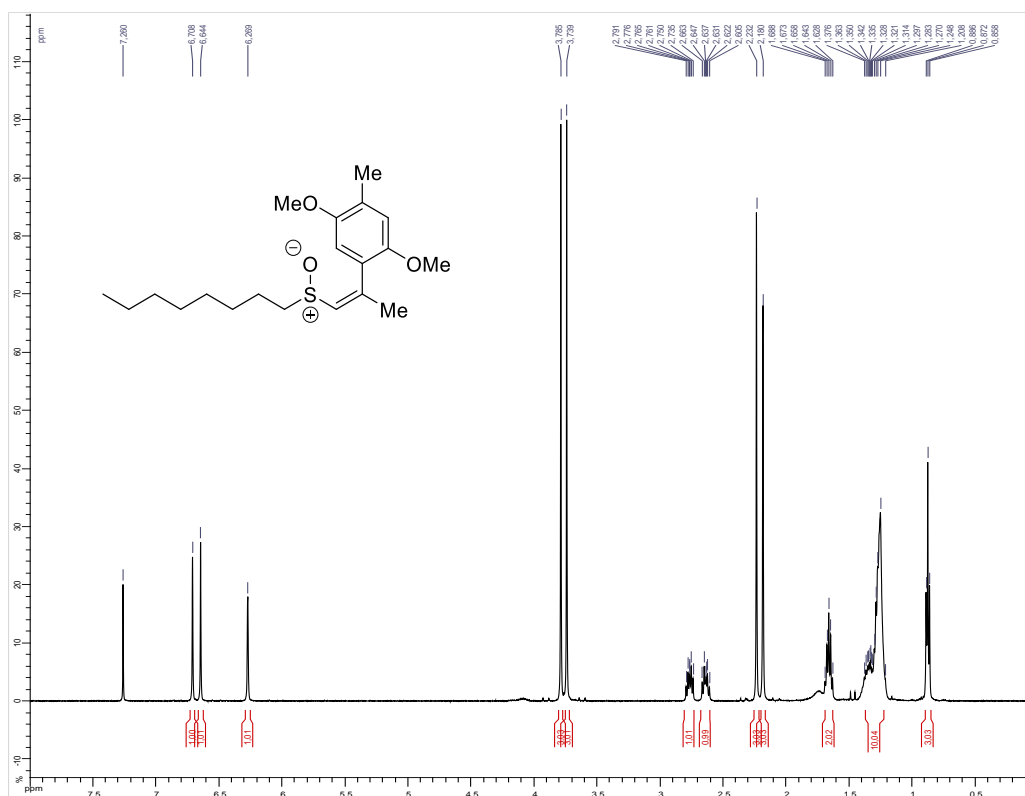

$^{13}\text{C}$  NMR ( $\text{CDCl}_3$ , 125 MHz)

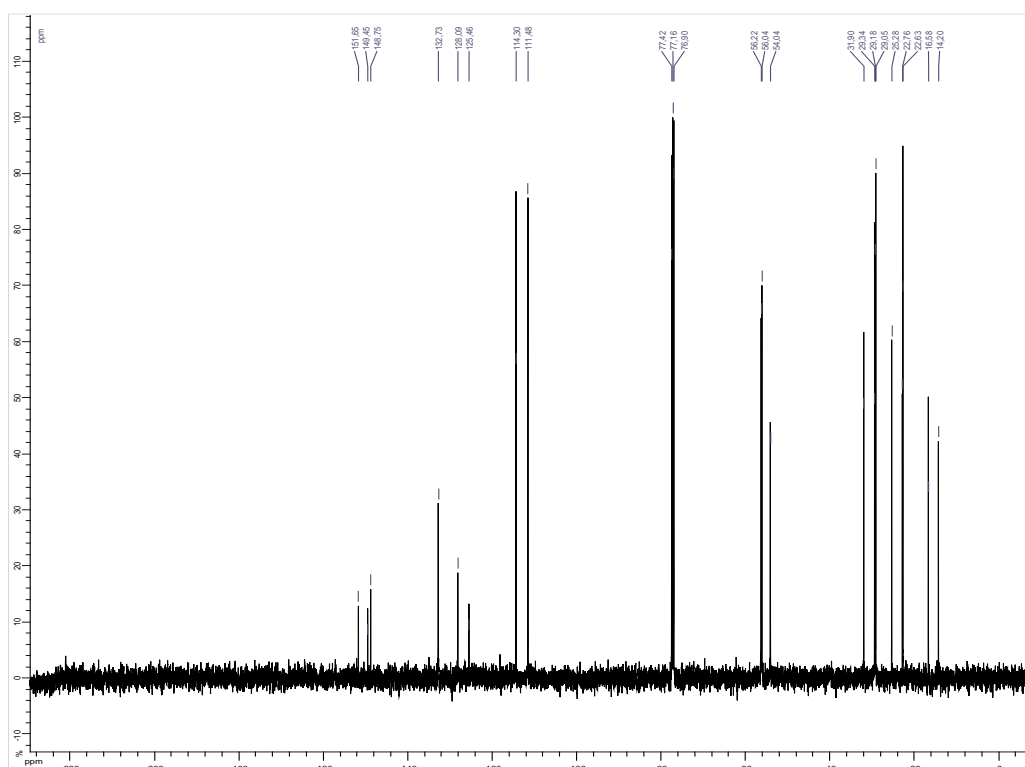



### III.6. (Z)-1h.

$^1\text{H}$  NMR ( $\text{CDCl}_3$ , 500 MHz)

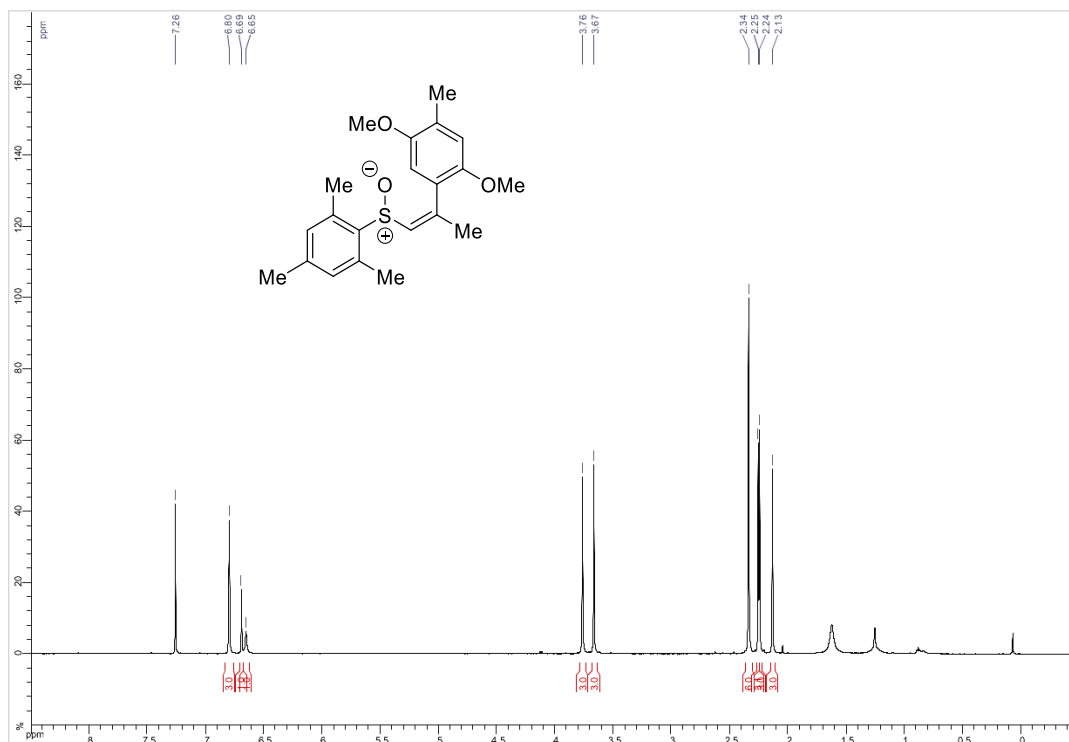

$^{13}\text{C}$  NMR ( $\text{CDCl}_3$ , 125 MHz)

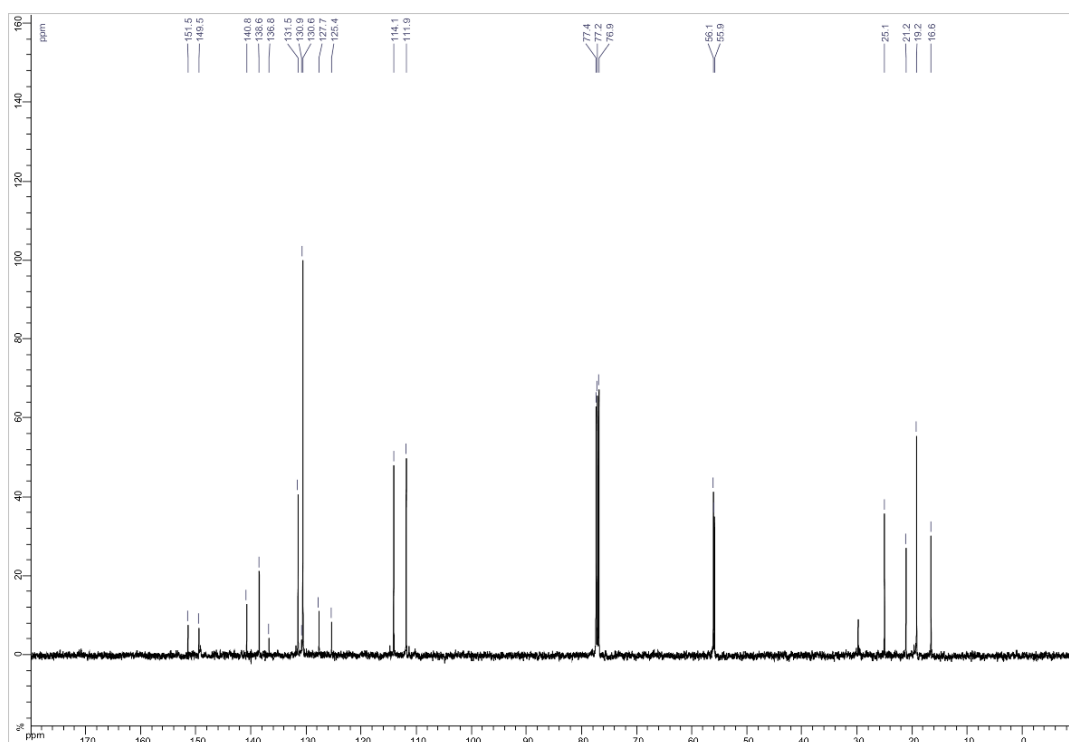

### III.7. 3a.

$^1\text{H}$  NMR ( $\text{CDCl}_3$ , 500 MHz)

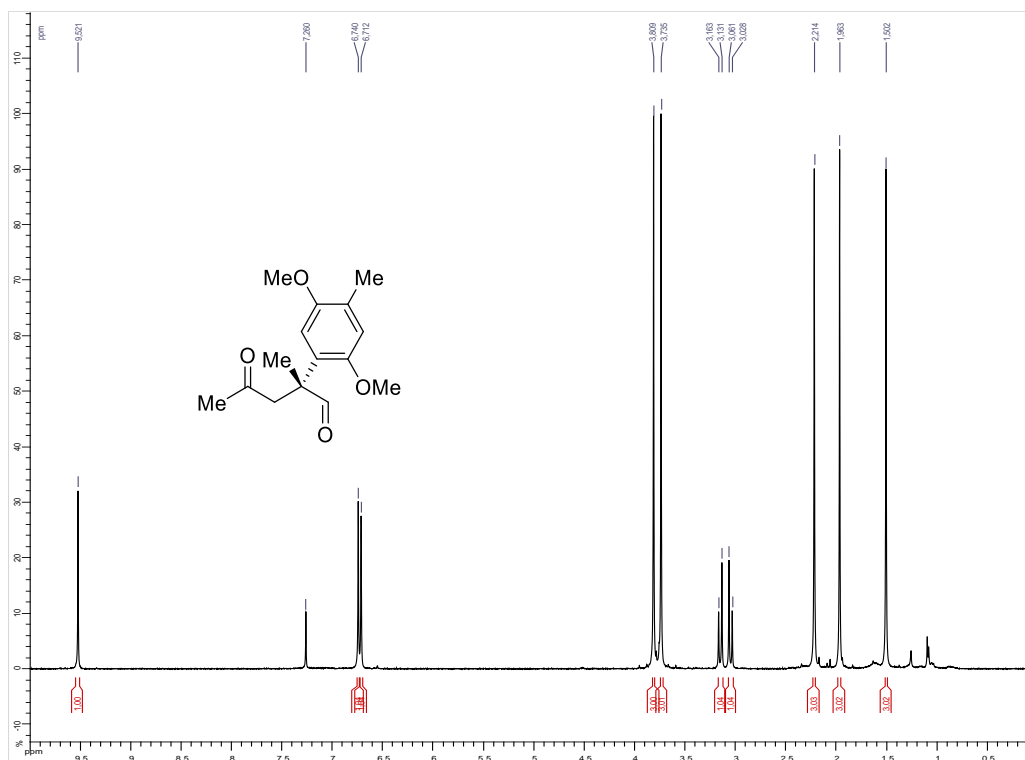

$^{13}\text{C}$  NMR ( $\text{CDCl}_3$ , 125 MHz)

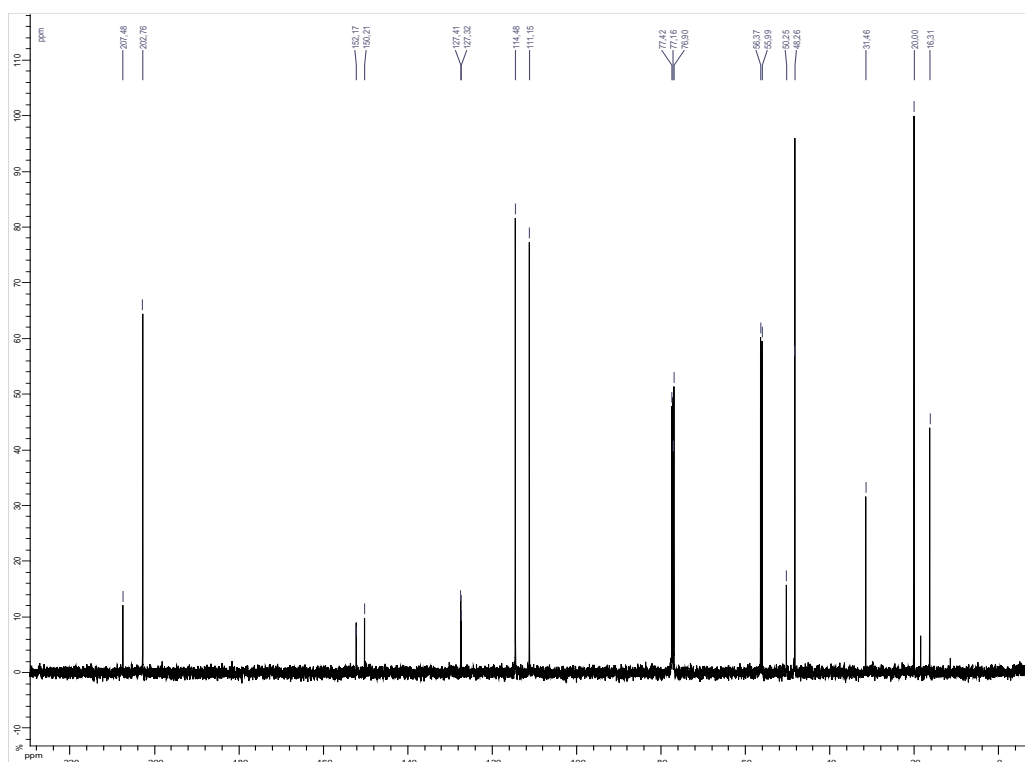

### III.8. 4a'

$^1\text{H}$  NMR ( $\text{CDCl}_3$ , 500 MHz)

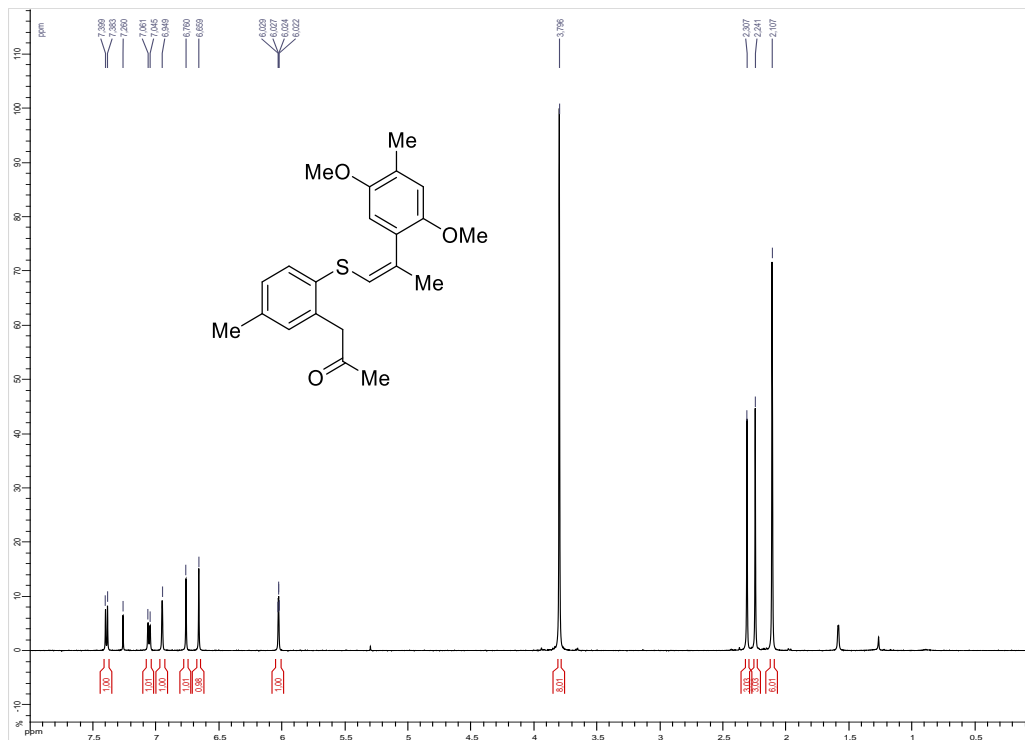

$^{13}\text{C}$  NMR ( $\text{CDCl}_3$ , 125 MHz)

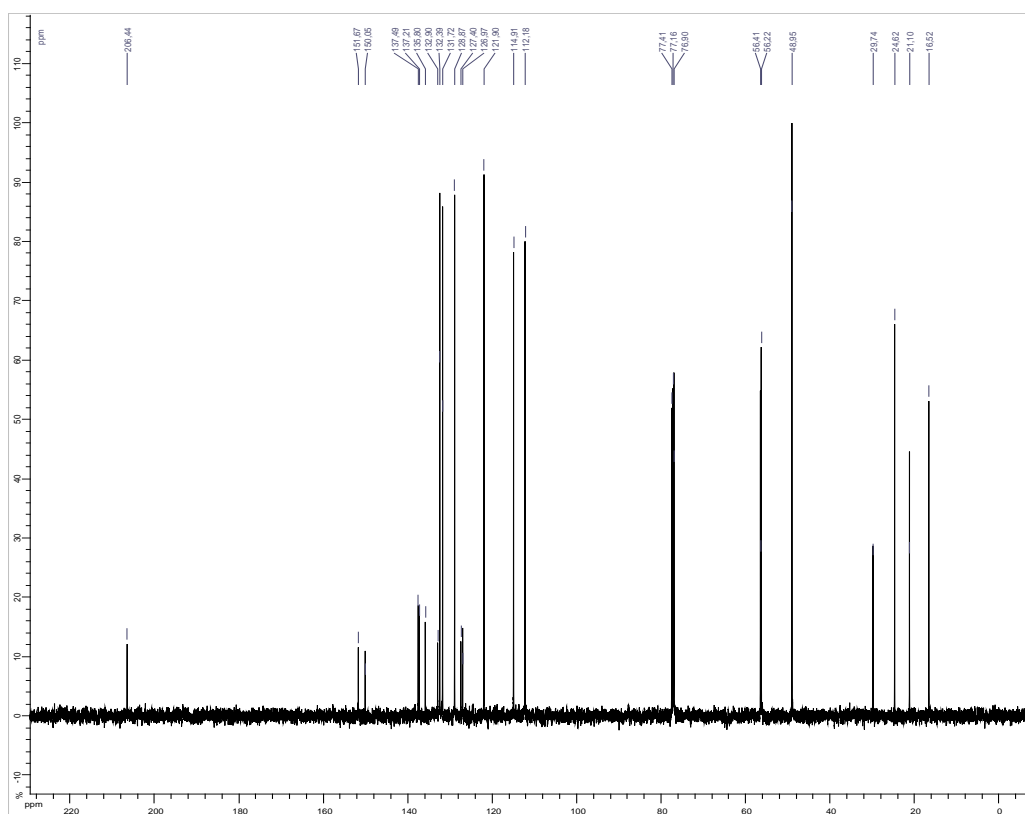

### III.9. (Z)-5a.

$^1\text{H}$  NMR ( $\text{CDCl}_3$ , 500 MHz)

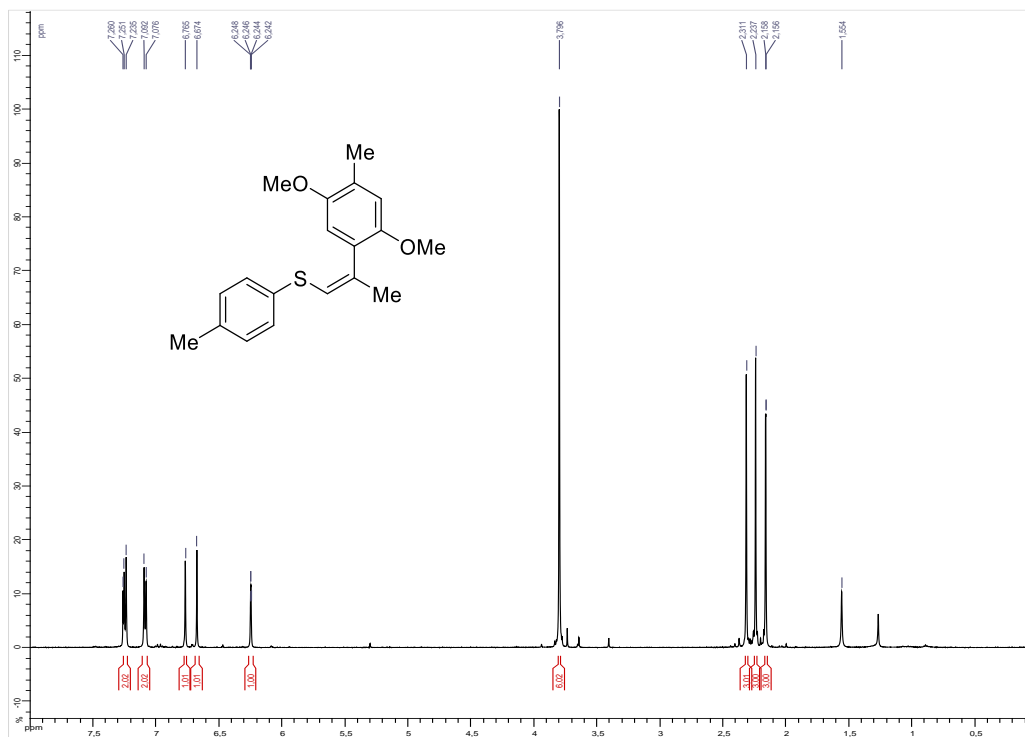

$^{13}\text{C}$  NMR ( $\text{CDCl}_3$ , 125 MHz)

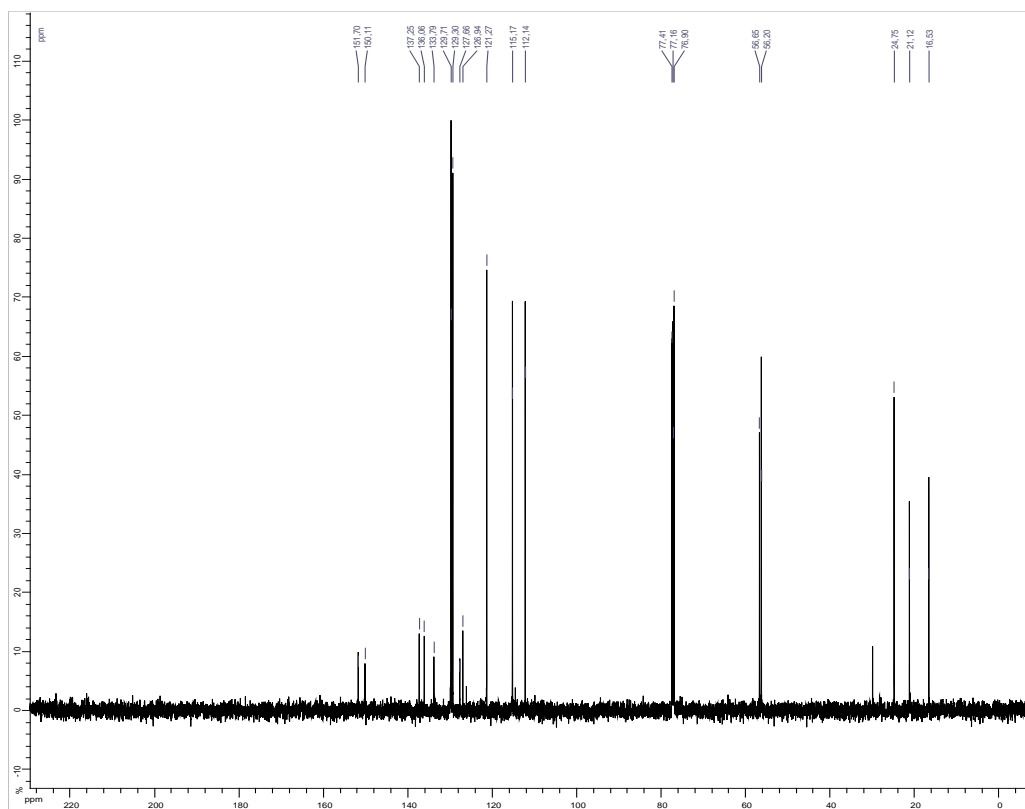

### III.10. (E)-5a.

$^1\text{H}$  NMR ( $\text{CDCl}_3$ , 500 MHz)

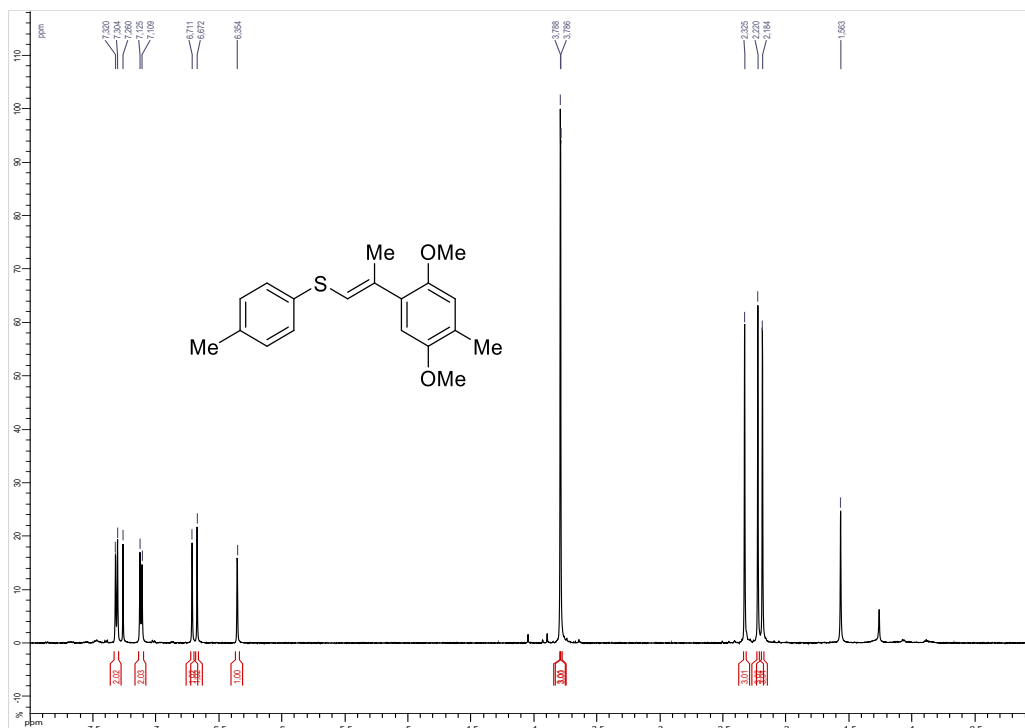

$^{13}\text{C}$  NMR ( $\text{CDCl}_3$ , 125 MHz)

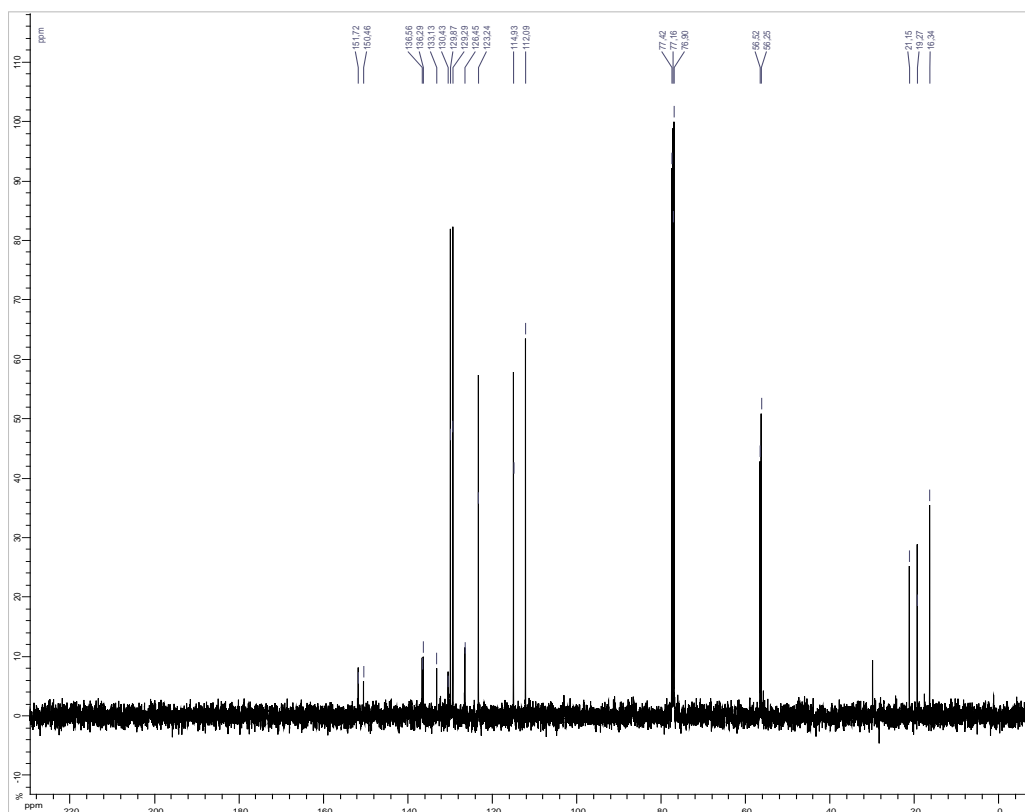



### III.12. (E)-4b.

$^1\text{H}$  NMR ( $\text{CDCl}_3$ , 500 MHz)

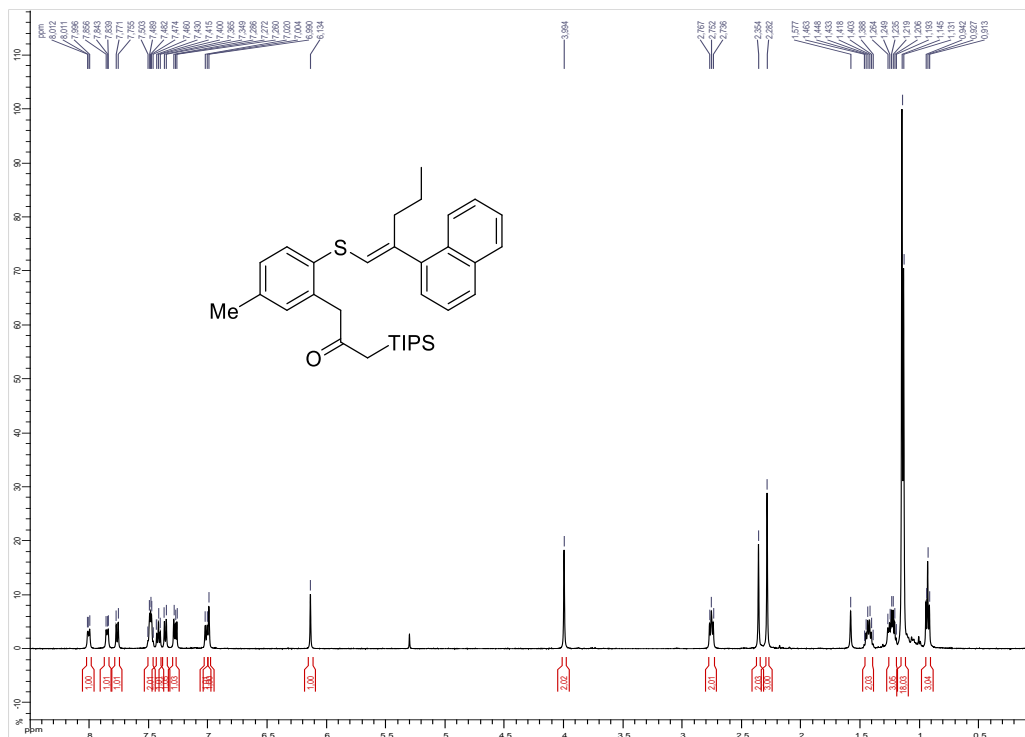

$^{13}\text{C}$  NMR ( $\text{CDCl}_3$ , 75 MHz)

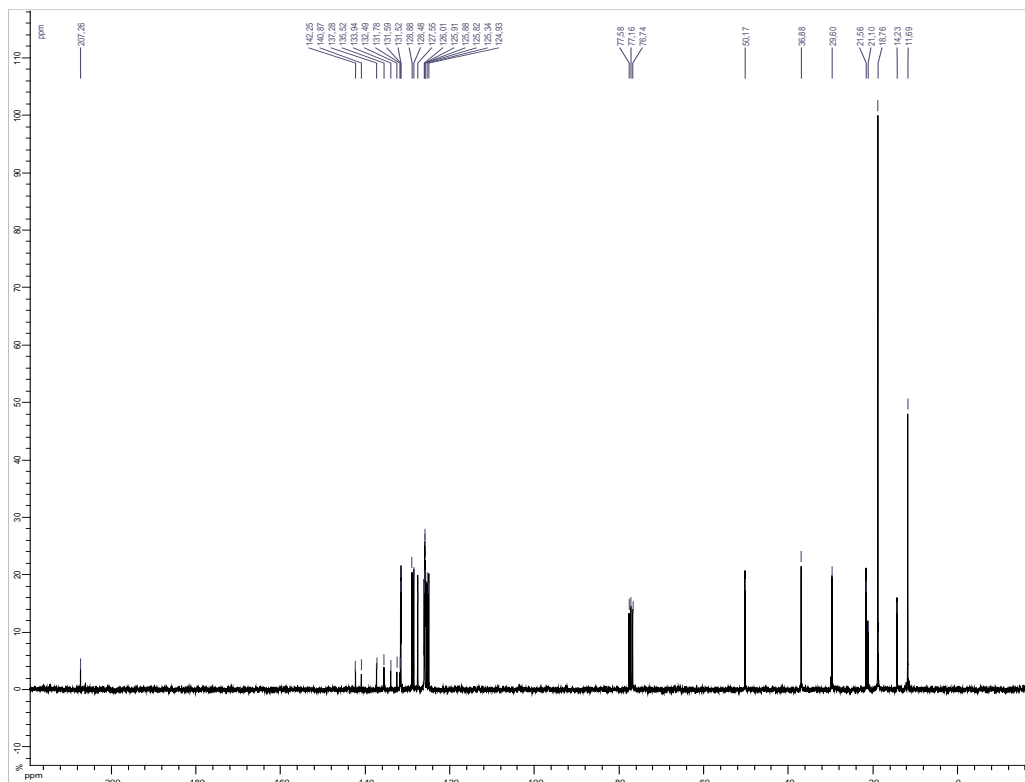

### III.13. (*E*)-5b.

<sup>1</sup>H NMR (CDCl<sub>3</sub>, 500 MHz)

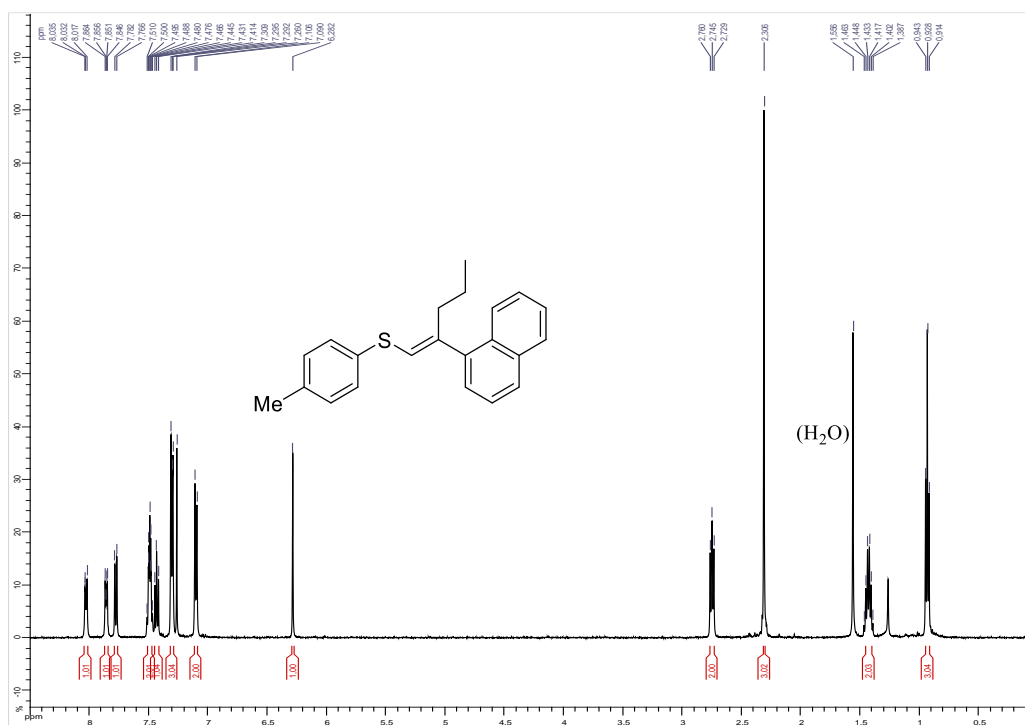

<sup>13</sup>C NMR (CDCl<sub>3</sub>, 125 MHz)

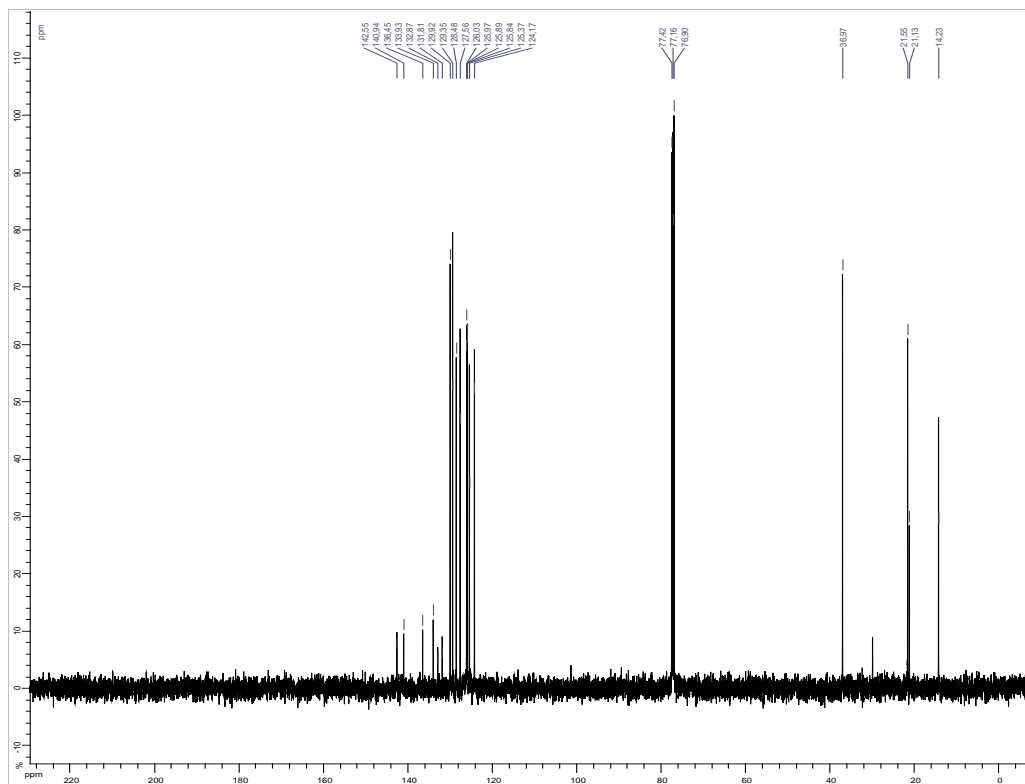



### III.14. 3c

$^1\text{H}$  NMR ( $\text{CDCl}_3$ , 500 MHz)

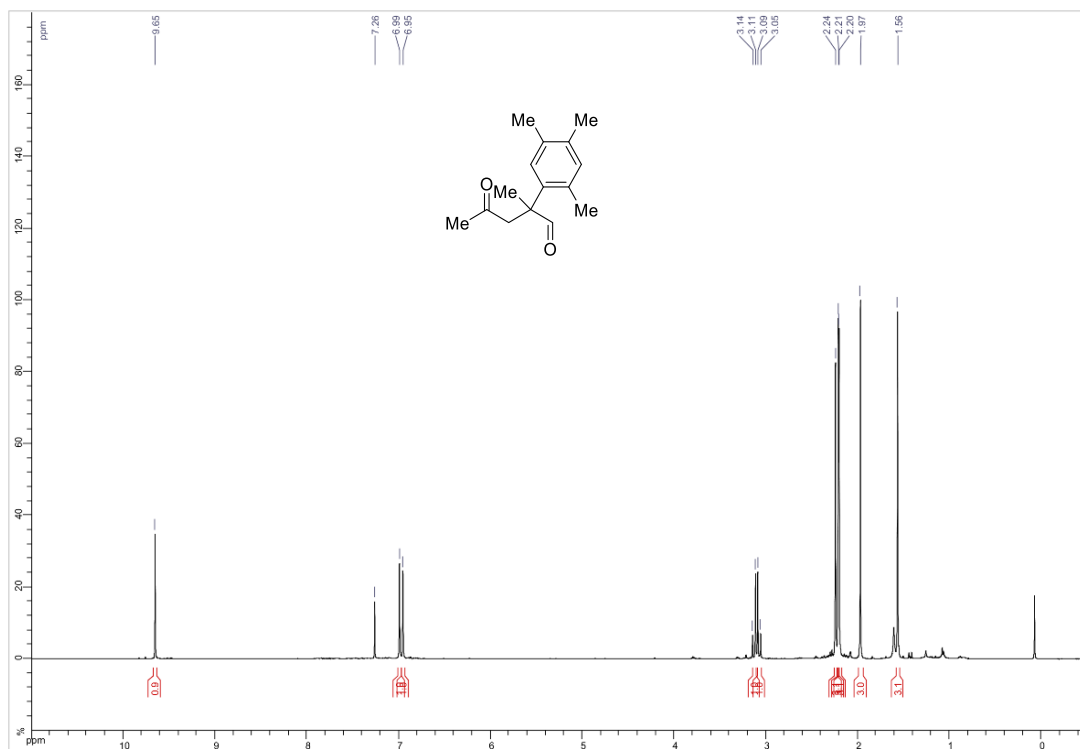

$^{13}\text{C}$  NMR ( $\text{CDCl}_3$ , 125 MHz)

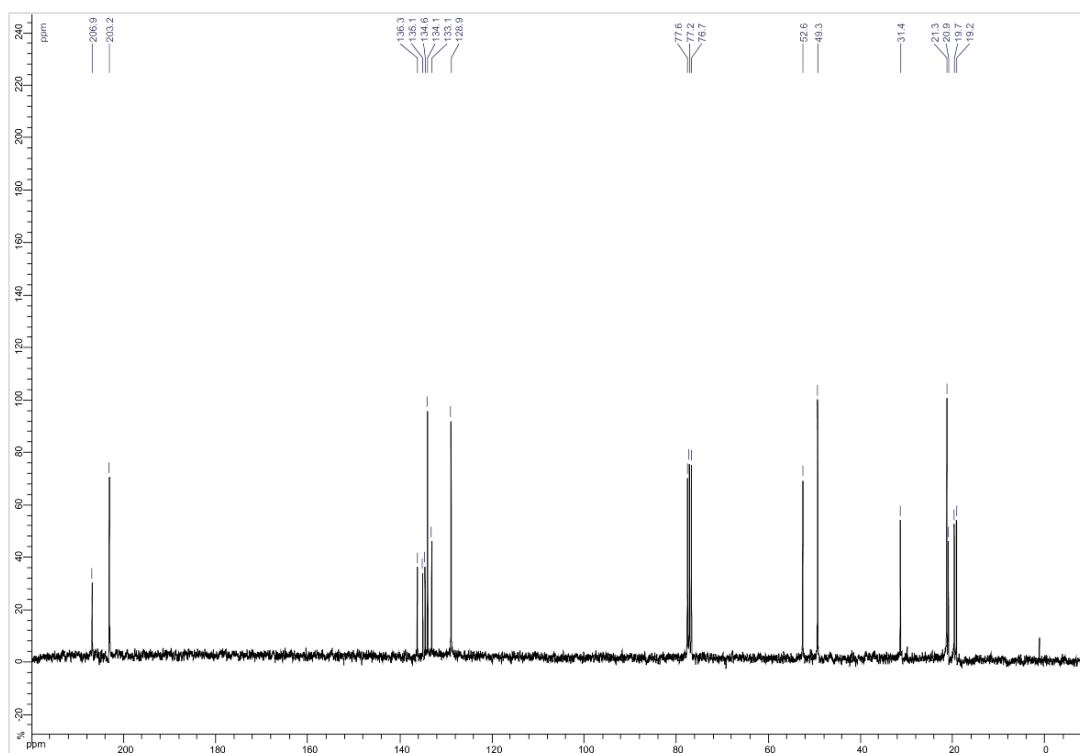

### III.15. (Z)-4c

$^1\text{H}$  NMR ( $\text{CDCl}_3$ , 500 MHz)

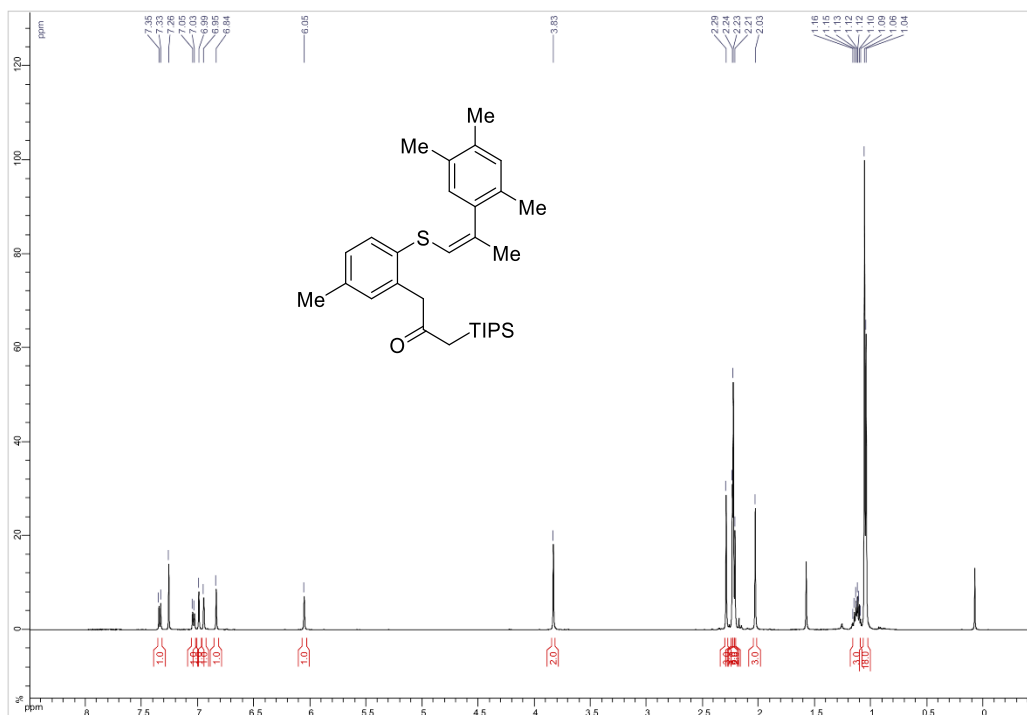

$^{13}\text{C}$  NMR ( $\text{CDCl}_3$ , 125 MHz)

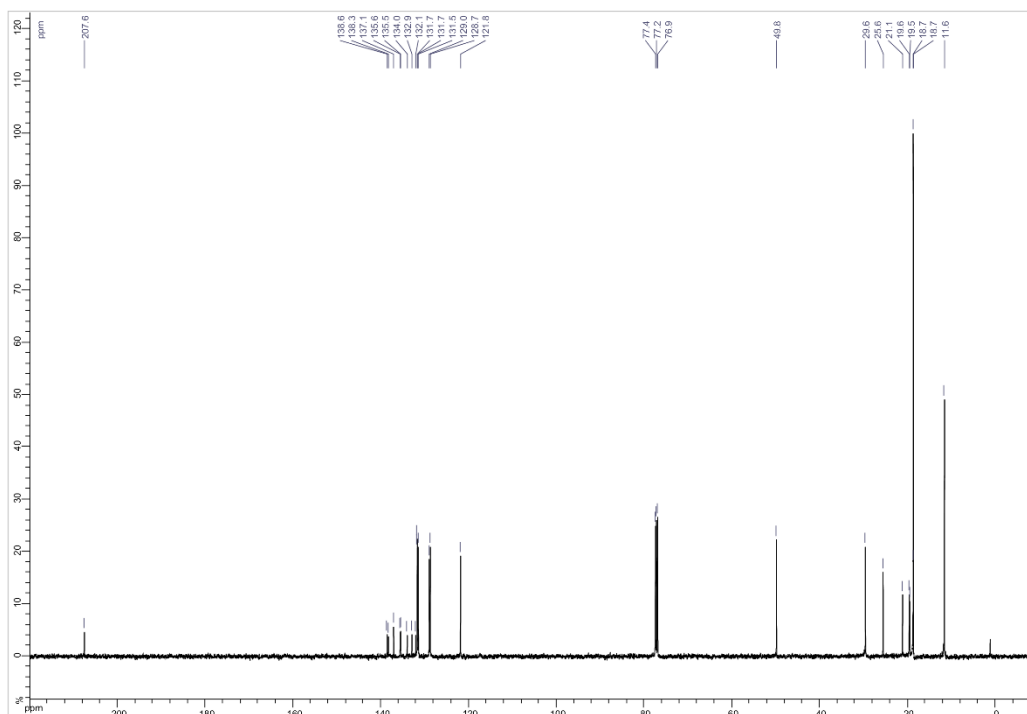

### III.16. (Z)-5c

$^1\text{H}$  NMR ( $\text{CDCl}_3$ , 500 MHz)

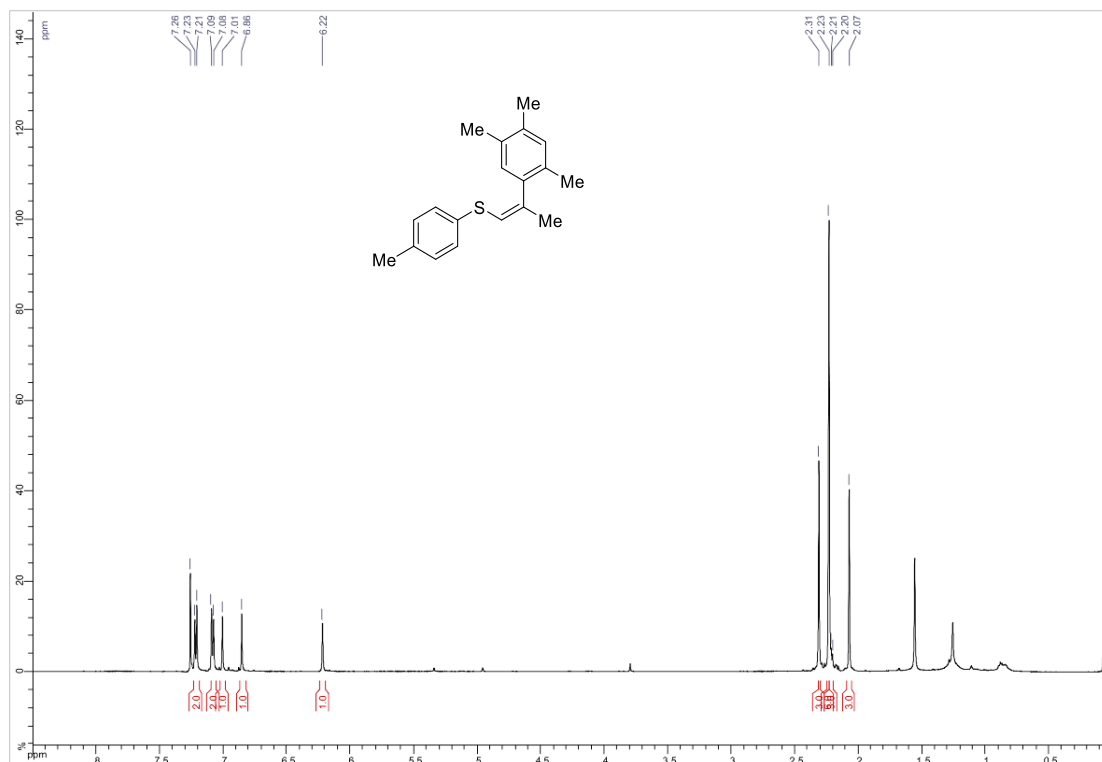

$^{13}\text{C}$  NMR ( $\text{CDCl}_3$ , 75 MHz)

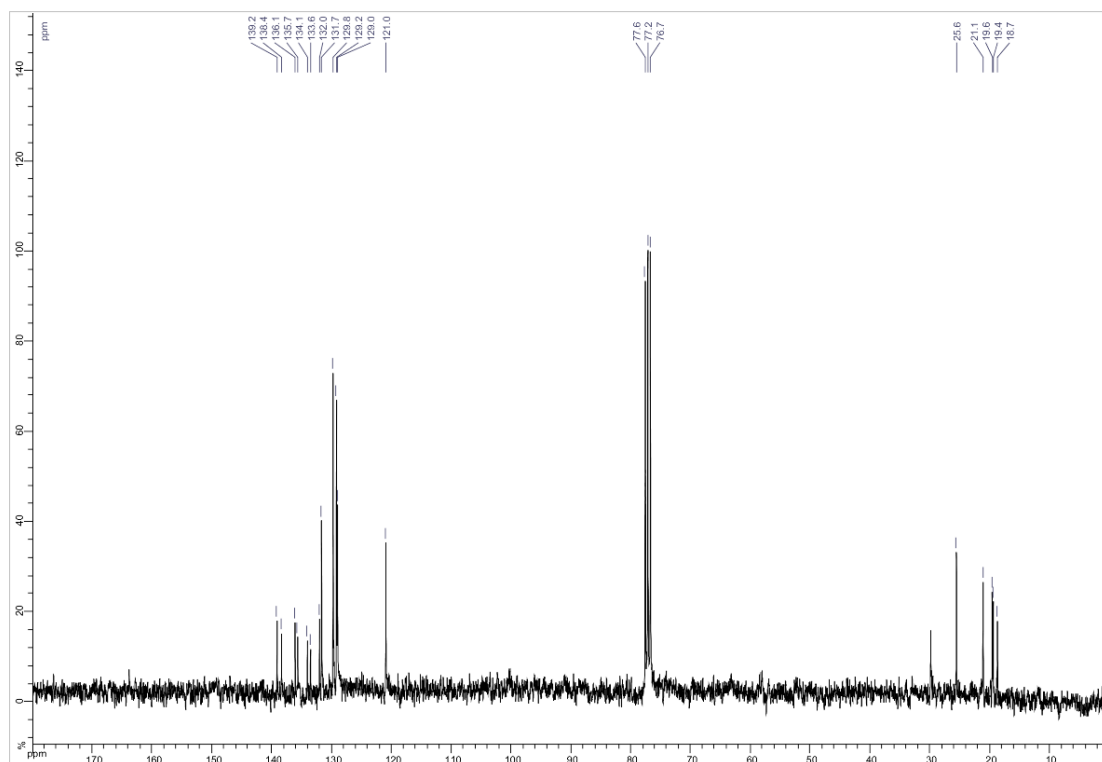

### III.17. (E)-4d.

$^1\text{H}$  NMR ( $\text{CDCl}_3$ , 500 MHz)

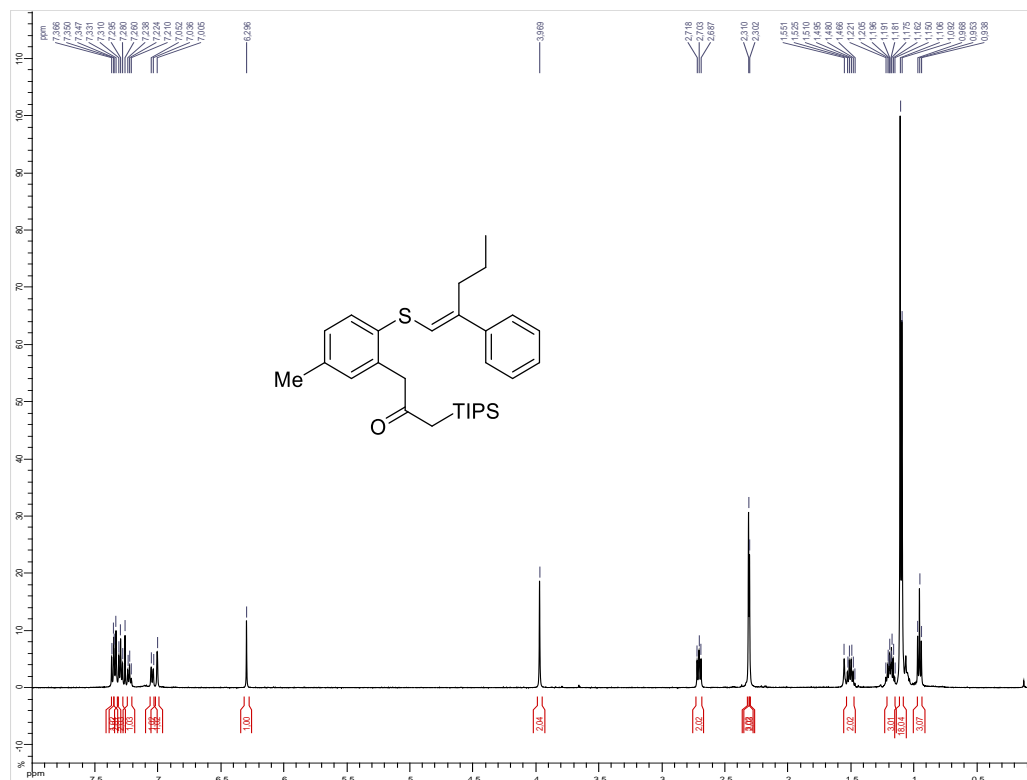

$^{13}\text{C}$  NMR ( $\text{CDCl}_3$ , 125 MHz)

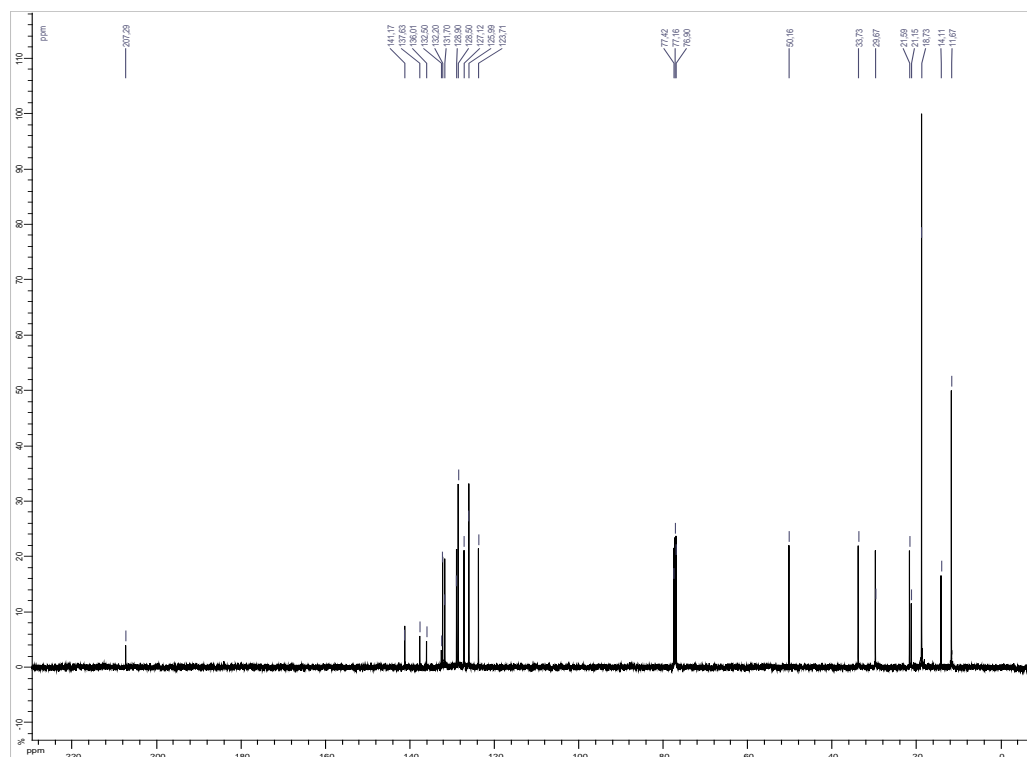

### III.18. (E)-5d.

$^1\text{H}$  NMR ( $\text{CDCl}_3$ , 500 MHz)

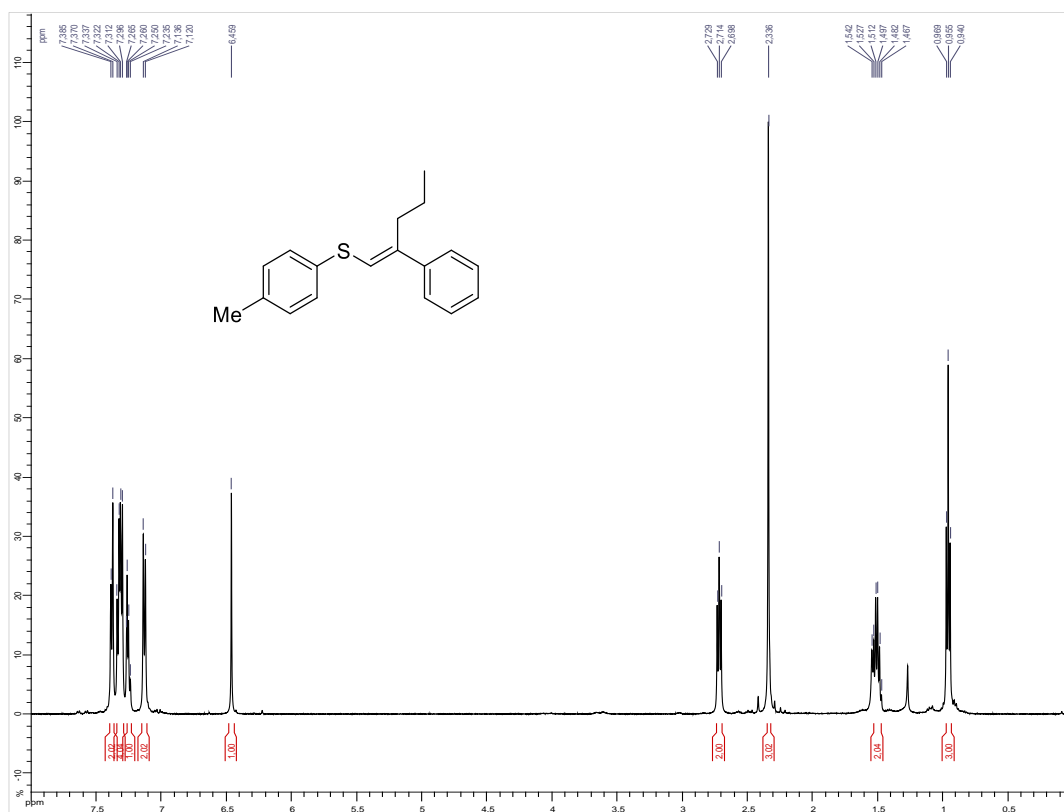

$^{13}\text{C}$  NMR ( $\text{CDCl}_3$ , 125 MHz)

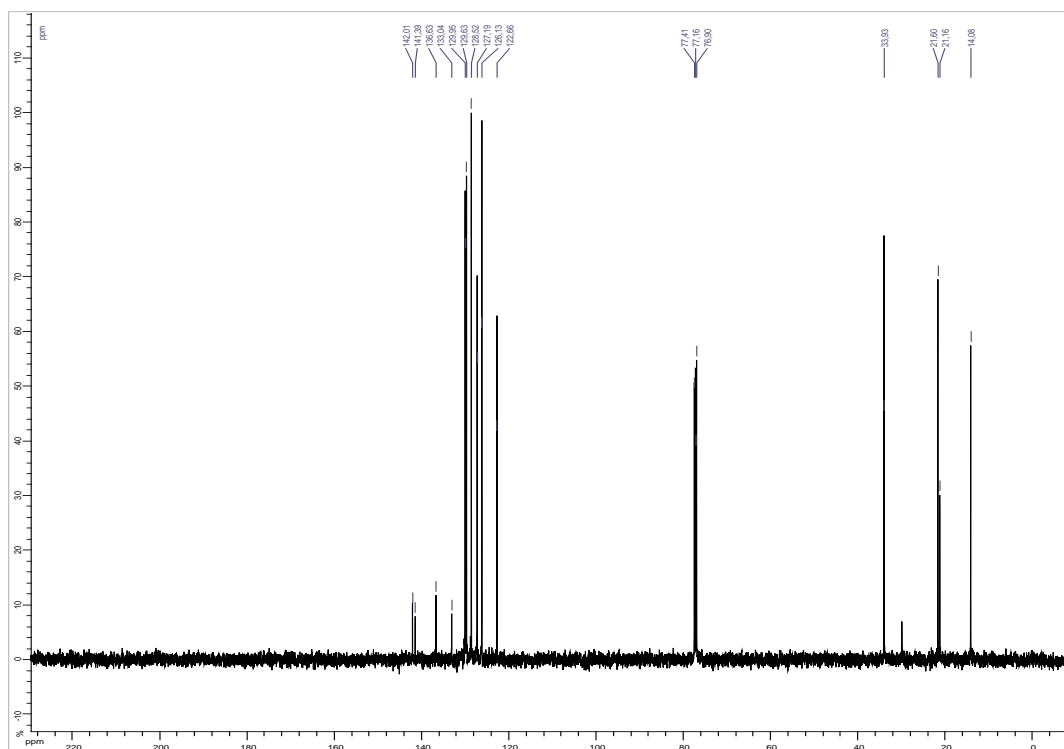

### III.19. (Z)-4d.

$^1\text{H}$  NMR ( $\text{CDCl}_3$ , 300 MHz)

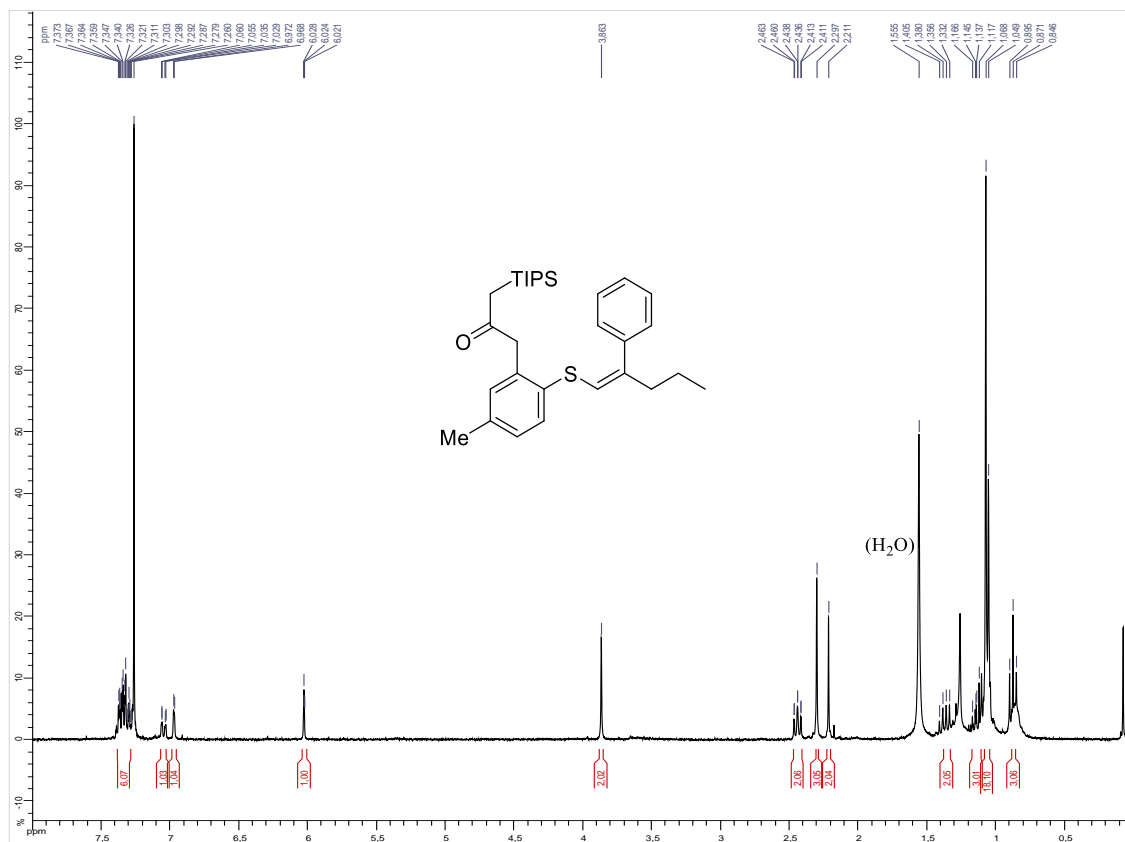

$^1\text{H}$  NMR ( $\text{CDCl}_3$ , 125 MHz)

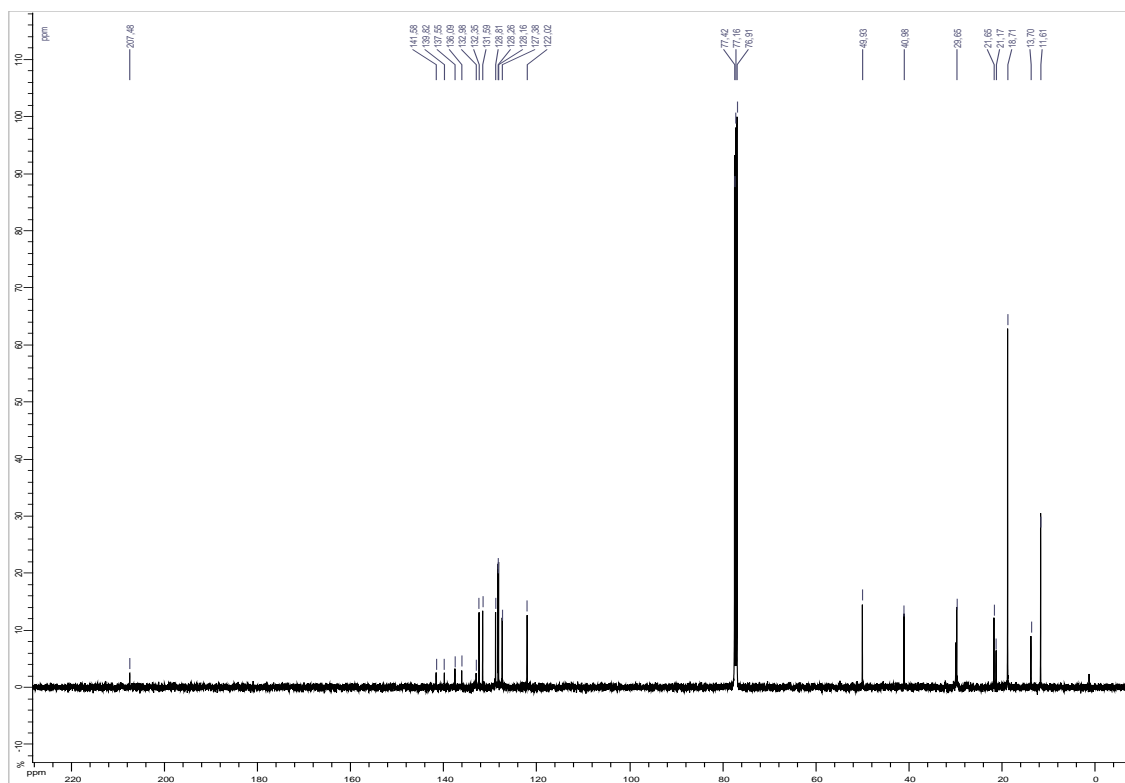

### III.20. (Z)-5d.

$^1\text{H}$  NMR ( $\text{CDCl}_3$ , 300 MHz)

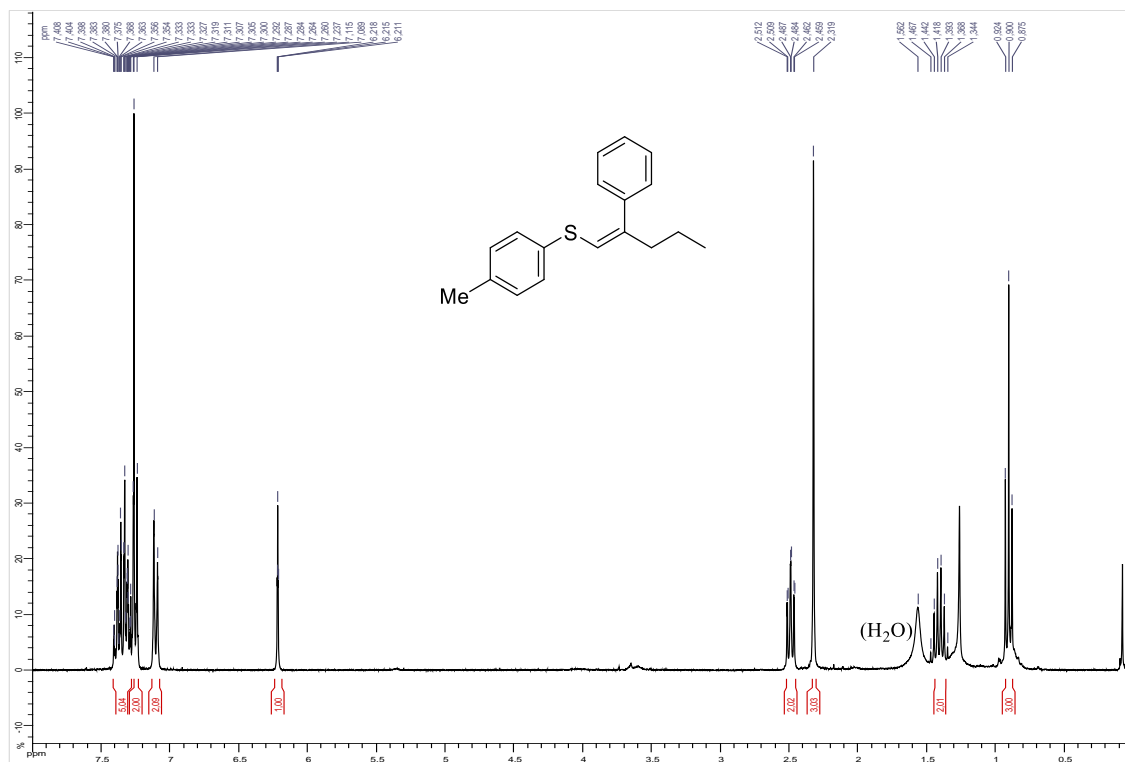

$^{13}\text{C}$  NMR ( $\text{CDCl}_3$ , 75 MHz)

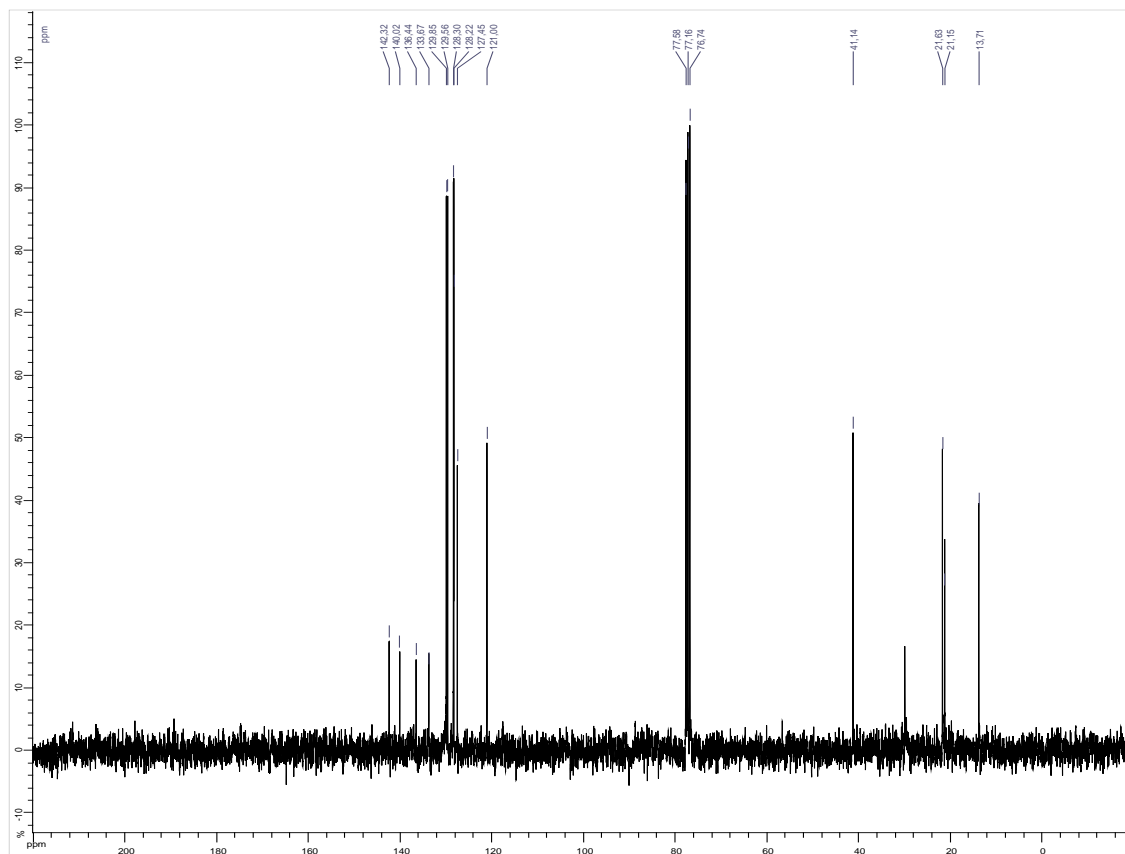

### III.21. 3e

$^1\text{H}$  NMR ( $\text{CDCl}_3$ , 500 MHz)

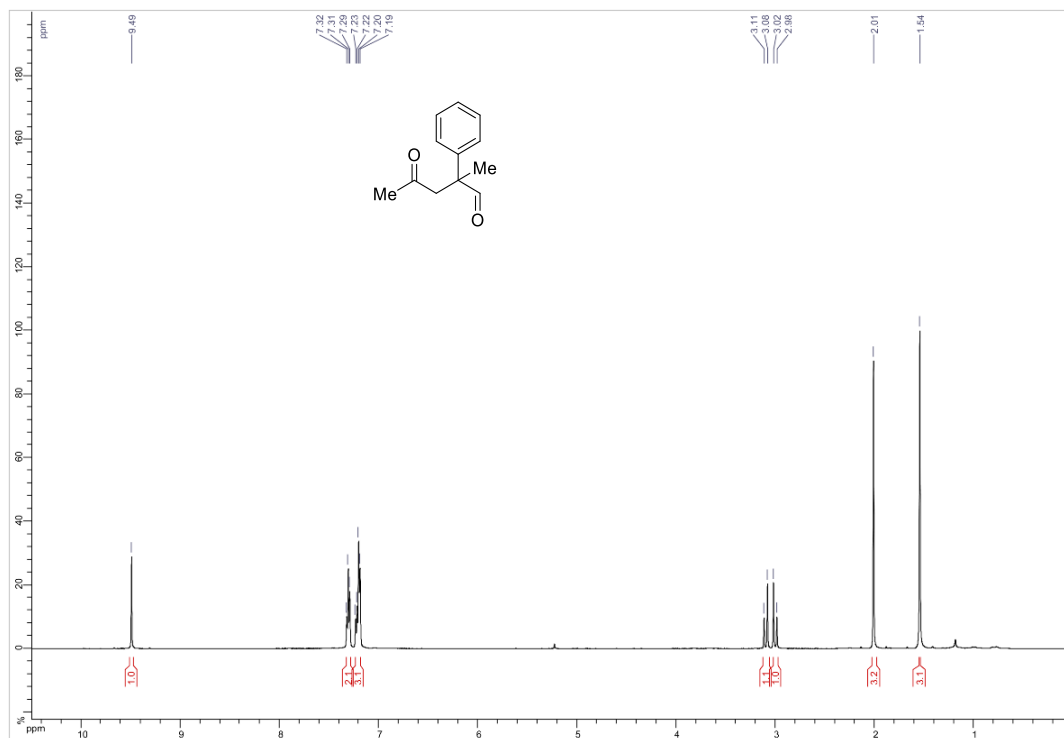

$^{13}\text{C}$  NMR ( $\text{CDCl}_3$ , 125 MHz)

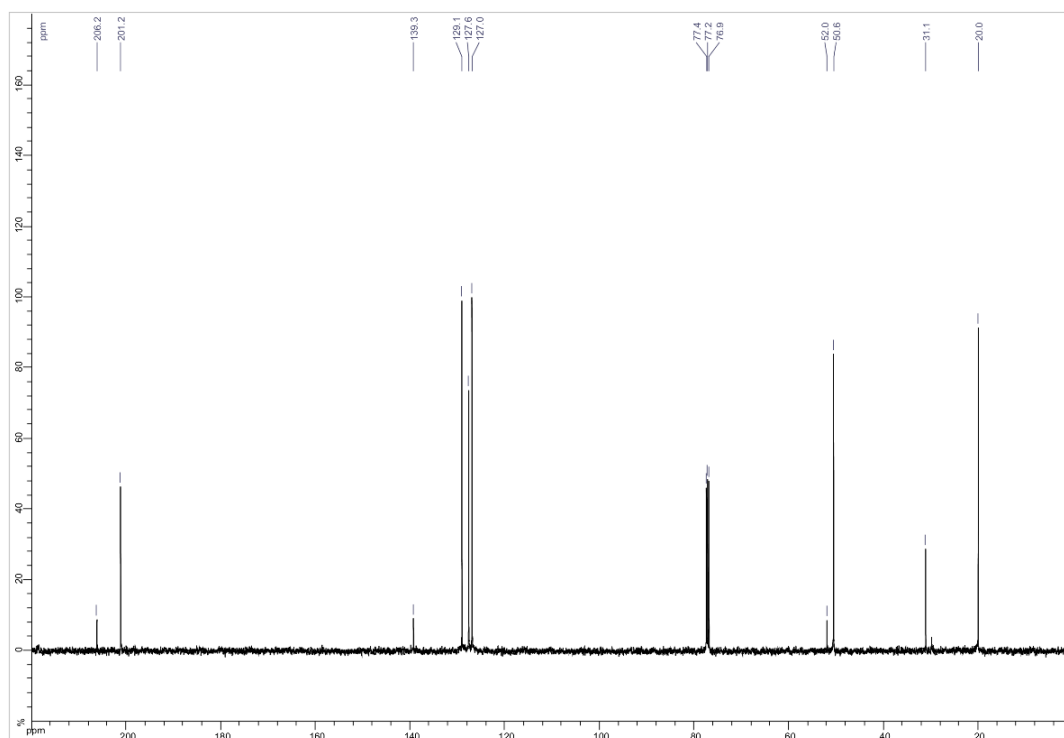



### III.22. (Z)-4e

$^1\text{H}$  NMR ( $\text{CDCl}_3$ , 500 MHz)

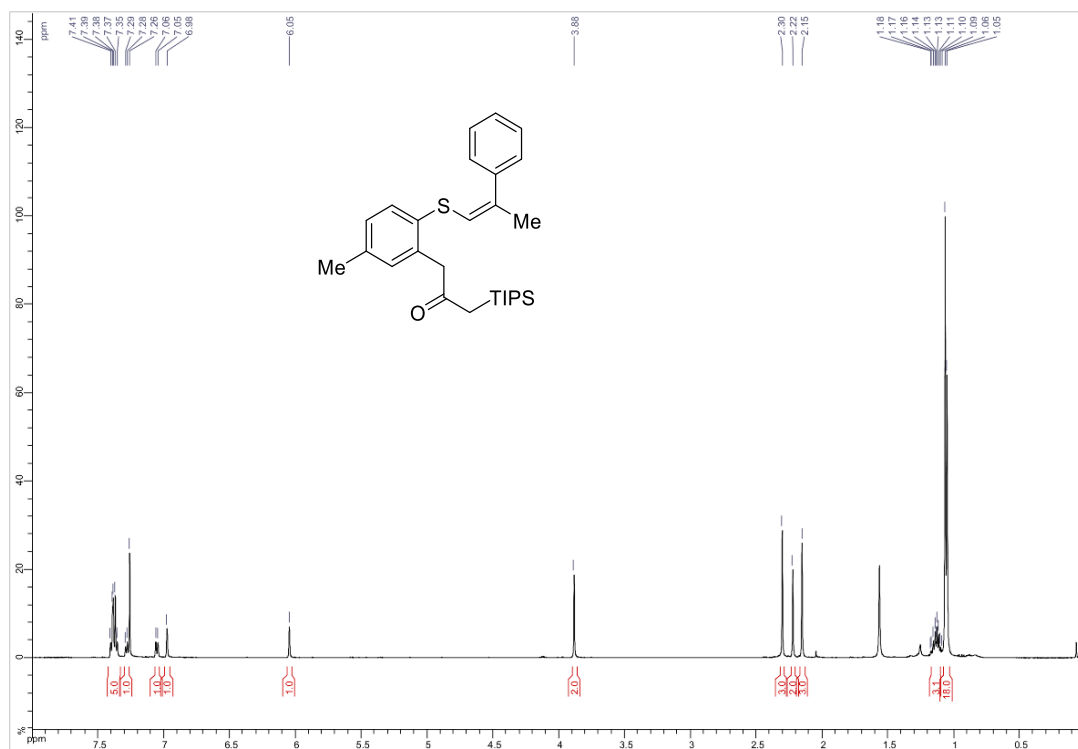

$^{13}\text{C}$  NMR ( $\text{CDCl}_3$ , 125 MHz)

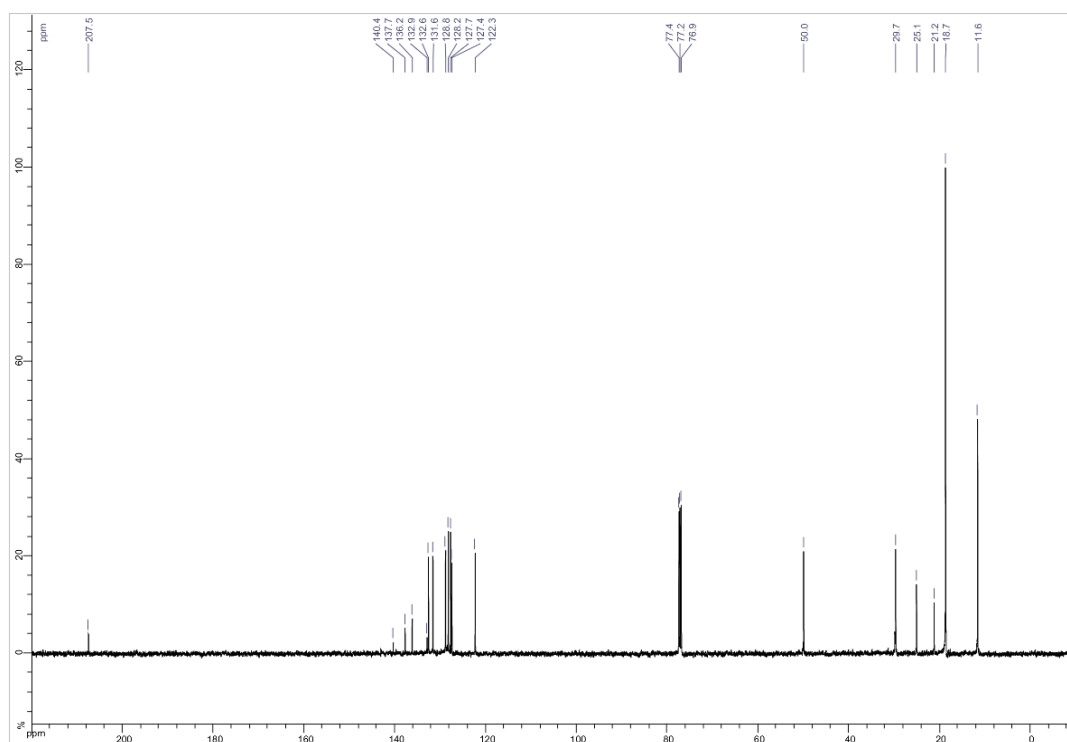

### III.23. (Z)-5e

$^1\text{H}$  NMR ( $\text{CDCl}_3$ , 500 MHz)

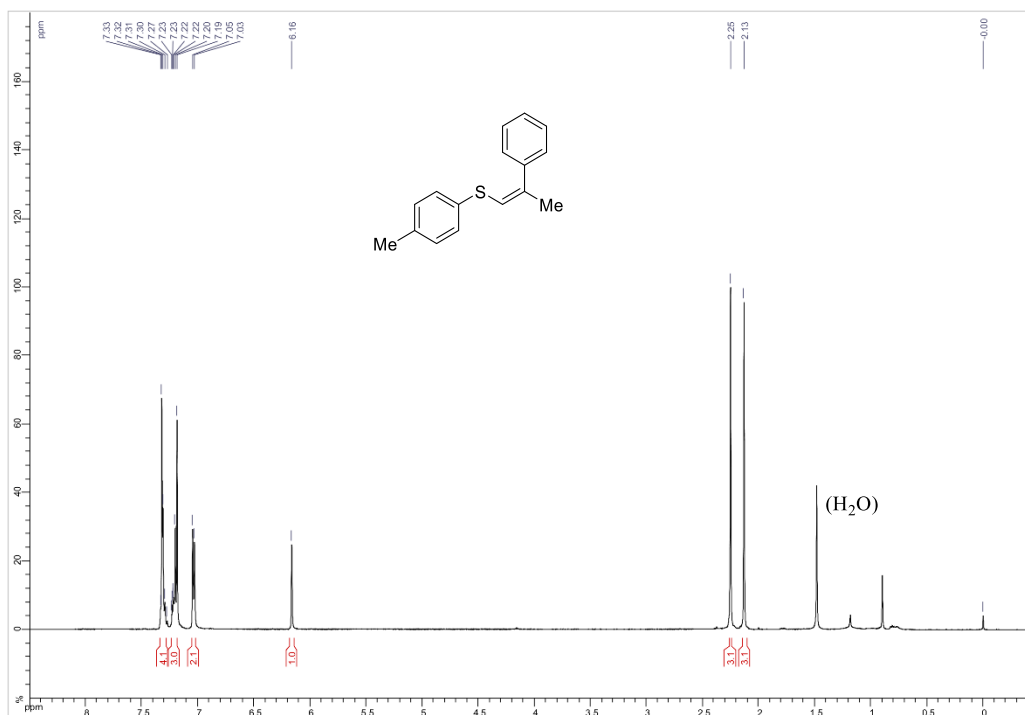

$^{13}\text{C}$  NMR ( $\text{CDCl}_3$ , 125 MHz)

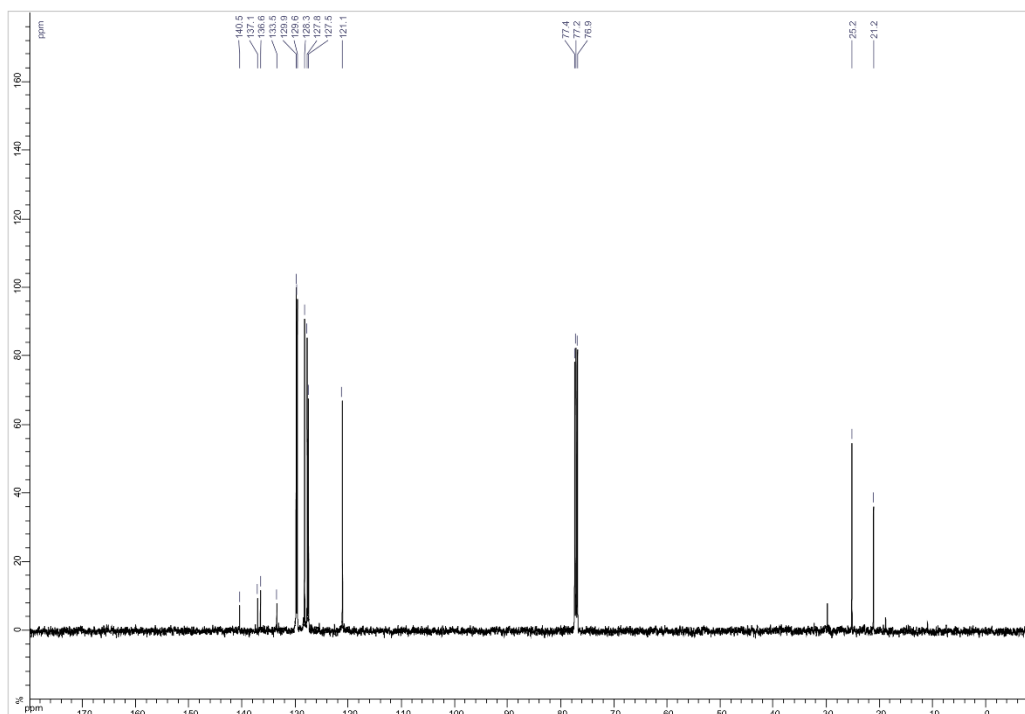

## IV. Chiral HPLC Spectra:

### IV.1. Compound (*S,Z*)-1d.

82% ee [Daicel Chiralpak IA column, heptane/*i*-PrOH = 90:10, 1.0 mL/min, 217.2 nm,  $t_R$  = 11.6 min and 14.0 min].

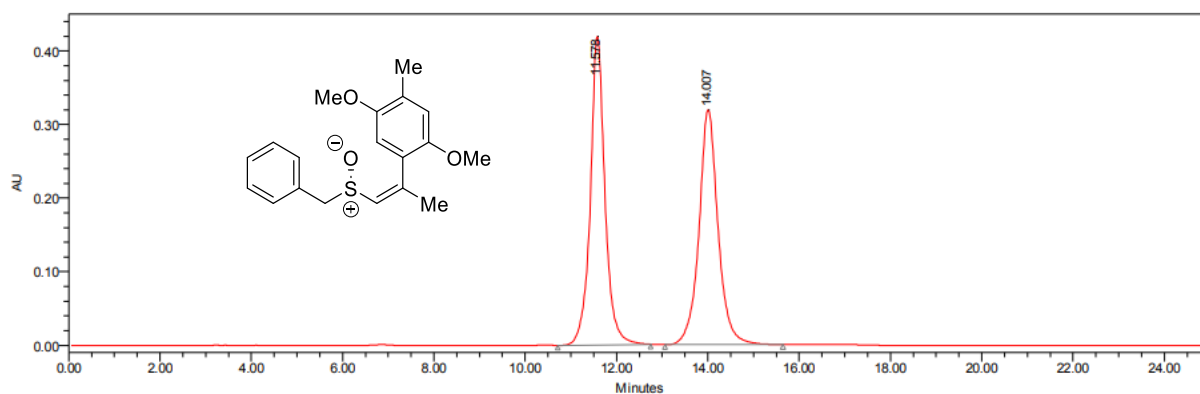

|   | Processed Channel Descr.                           | RT     | Area    | % Area |
|---|----------------------------------------------------|--------|---------|--------|
| 1 | 996 PDA 217.2 nm (PDA 200.0 to 400.0 nm at 2.4 nm) | 11.578 | 9338913 | 50.14  |
| 2 | 996 PDA 217.2 nm (PDA 200.0 to 400.0 nm at 2.4 nm) | 14.007 | 9286217 | 49.86  |

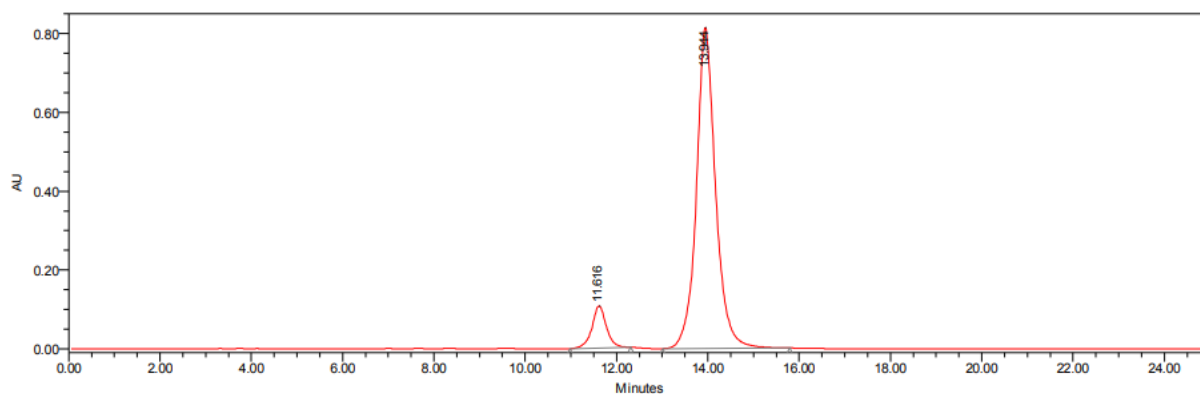

|   | Processed Channel Descr.                           | RT     | Area     | % Area |
|---|----------------------------------------------------|--------|----------|--------|
| 1 | 996 PDA 217.2 nm (PDA 200.0 to 400.0 nm at 2.4 nm) | 11.616 | 2332600  | 8.93   |
| 2 | 996 PDA 217.2 nm (PDA 200.0 to 400.0 nm at 2.4 nm) | 13.944 | 23782399 | 91.07  |

## IV.2. Compound (*R*)-3a.

96% ee [Daicel Chiralpak IA column, heptane/*i*-PrOH = 80:20, 1.0 mL/min, 290.6 nm,  $t_R$  = 4.8 min and 6.6 min].

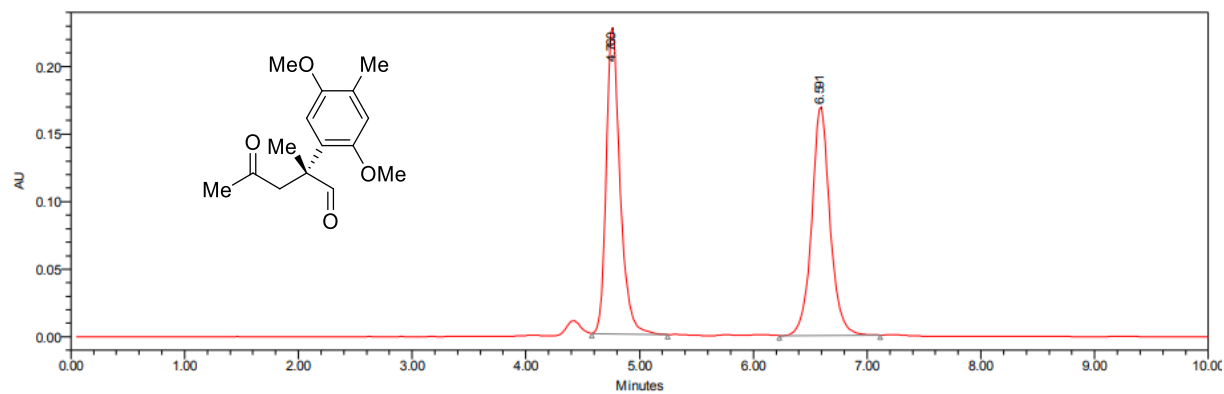

|   | Processed Channel Descr.                           | RT    | Area    | % Area |
|---|----------------------------------------------------|-------|---------|--------|
| 1 | 996 PDA 290.6 nm (PDA 200.0 to 400.0 nm at 2.4 nm) | 4.760 | 1909256 | 50.41  |
| 2 | 996 PDA 290.6 nm (PDA 200.0 to 400.0 nm at 2.4 nm) | 6.591 | 1878198 | 49.59  |

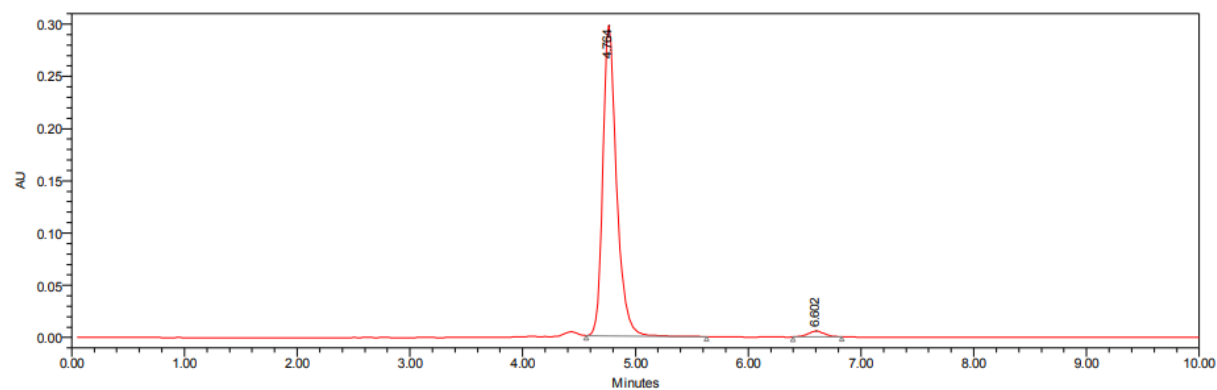

|   | Processed Channel Descr.                           | RT    | Area    | % Area |
|---|----------------------------------------------------|-------|---------|--------|
| 1 | 996 PDA 290.6 nm (PDA 200.0 to 400.0 nm at 2.4 nm) | 4.764 | 2510266 | 97.79  |
| 2 | 996 PDA 290.6 nm (PDA 200.0 to 400.0 nm at 2.4 nm) | 6.602 | 56631   | 2.21   |

### IV.3. Compound (*S*)-3a.

99% ee [Daicel Chiralpak IA column, heptane/*i*-PrOH = 80:20, 1.0 mL/min, 290.6 nm,  $t_R$  = 4.8 min and 6.6 min].

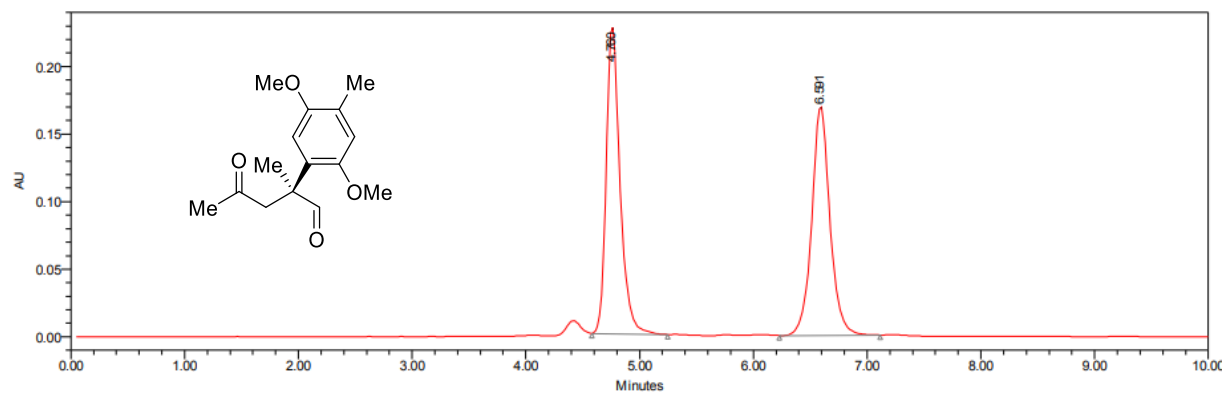

|   | Processed Channel Descr.                           | RT    | Area    | % Area |
|---|----------------------------------------------------|-------|---------|--------|
| 1 | 996 PDA 290.6 nm (PDA 200.0 to 400.0 nm at 2.4 nm) | 4.760 | 1909256 | 50.41  |
| 2 | 996 PDA 290.6 nm (PDA 200.0 to 400.0 nm at 2.4 nm) | 6.591 | 1878198 | 49.59  |

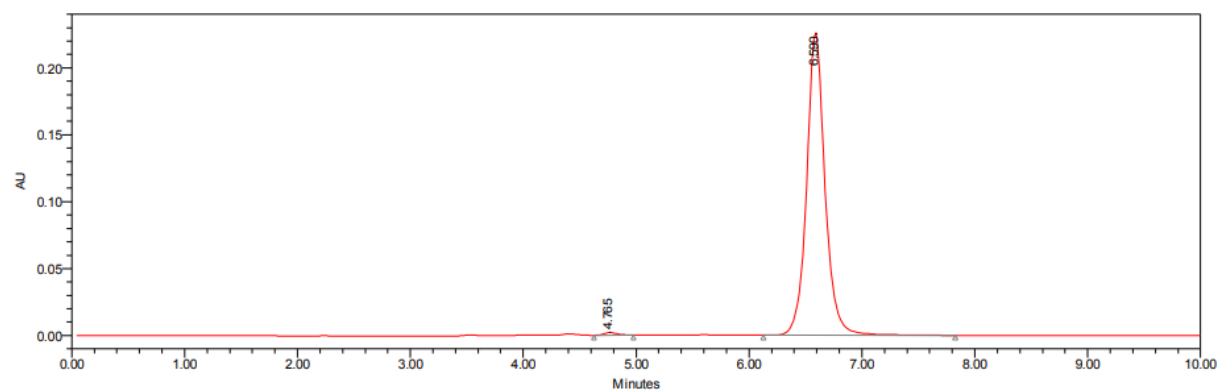

|   | Processed Channel Descr.                           | RT    | Area    | % Area |
|---|----------------------------------------------------|-------|---------|--------|
| 1 | 996 PDA 290.6 nm (PDA 200.0 to 400.0 nm at 2.4 nm) | 4.765 | 18202   | 0.70   |
| 2 | 996 PDA 290.6 nm (PDA 200.0 to 400.0 nm at 2.4 nm) | 6.590 | 2566592 | 99.30  |

#### IV.4. Compound (*R*)-3b.

96% ee [Daicel Chiralpak IC column, heptane/*i*-PrOH = 80:20, 1.0 mL/min, 281.1 nm,  $t_R$  = 7.6 min and 11.8 min].

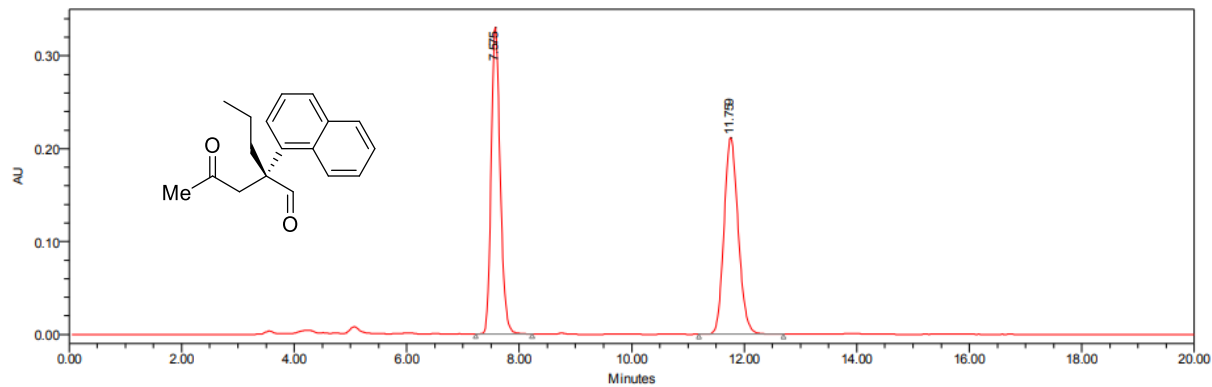

|   | Processed Channel Descr.                           | RT     | Area    | % Area |
|---|----------------------------------------------------|--------|---------|--------|
| 1 | 996 PDA 281.1 nm (PDA 200.0 to 400.0 nm at 2.4 nm) | 7.575  | 3690943 | 49.89  |
| 2 | 996 PDA 281.1 nm (PDA 200.0 to 400.0 nm at 2.4 nm) | 11.759 | 3707950 | 50.11  |

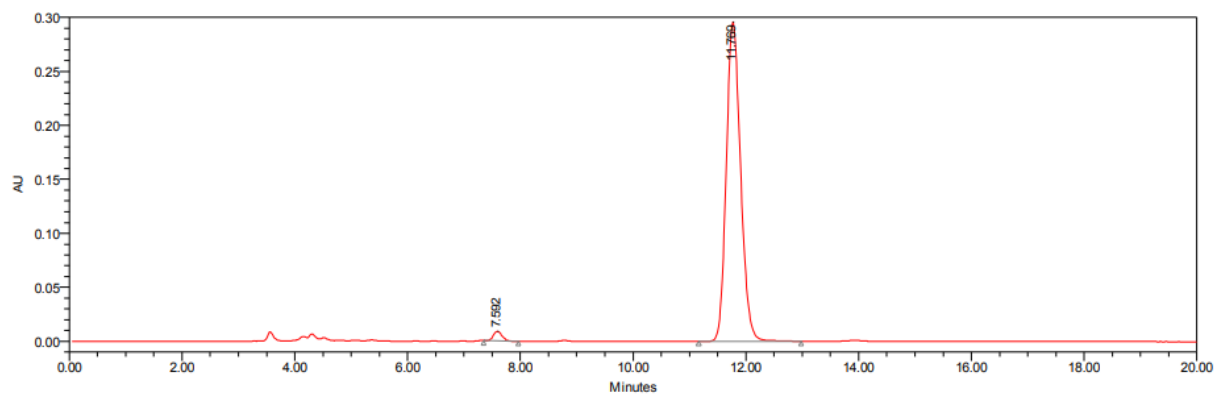

|   | Processed Channel Descr.                           | RT     | Area    | % Area |
|---|----------------------------------------------------|--------|---------|--------|
| 1 | 996 PDA 281.1 nm (PDA 200.0 to 400.0 nm at 2.4 nm) | 7.592  | 94328   | 1.78   |
| 2 | 996 PDA 281.1 nm (PDA 200.0 to 400.0 nm at 2.4 nm) | 11.769 | 5203913 | 98.22  |

## V. Computational details:

**Table S1.** Coordinates (x,y,z), energies (Hartree, uncorrected) and imaginary frequencies ( $\text{cm}^{-1}$ ) of the computed species.

| <b>1</b>                                             |           |           |           | <b>3</b>                                             |           |           |           |
|------------------------------------------------------|-----------|-----------|-----------|------------------------------------------------------|-----------|-----------|-----------|
| Thermal correction to Gibbs Free Energy=<br>0.222592 |           |           |           | Thermal correction to Gibbs Free Energy=<br>0.290376 |           |           |           |
| E(RBMK) = -1092.42351353                             |           |           |           | E(RBMK) = -761.391472322                             |           |           |           |
| C                                                    | 1.662742  | -0.995033 | 1.103969  | C                                                    | -3.233151 | -0.636346 | -1.293682 |
| C                                                    | 0.464889  | -1.316284 | 0.604036  | C                                                    | -1.975776 | -0.659027 | -1.561766 |
| C                                                    | 2.575162  | -0.015705 | 0.461906  | H                                                    | -3.621094 | -0.274583 | -0.345416 |
| C                                                    | 2.153303  | -1.621207 | 2.376558  | H                                                    | -3.942297 | -0.993608 | -2.039166 |
| S                                                    | -0.117225 | -0.830988 | -1.013611 | C                                                    | -0.661912 | -0.699261 | -1.816601 |
| H                                                    | -0.18547  | -2.046667 | 1.080007  | H                                                    | -0.251807 | 0.03658   | -2.510043 |
| O                                                    | -0.426015 | -2.129211 | -1.712181 | H                                                    | -0.176126 | -1.677319 | -1.78638  |
| C                                                    | -1.718556 | -0.187973 | -0.463663 | Si                                                   | 0.184901  | 0.098884  | 0.001792  |
| C                                                    | -2.816411 | -1.023028 | -0.591264 | C                                                    | 1.984933  | -0.33542  | -0.382778 |
| C                                                    | -1.861304 | 1.112322  | 0.004533  | C                                                    | -0.634449 | -0.79756  | 1.442893  |
| C                                                    | 3.843368  | -0.413639 | 0.030748  | C                                                    | -0.137869 | 1.957318  | -0.101702 |
| C                                                    | 2.202515  | 1.320094  | 0.305475  | H                                                    | 2.481321  | 0.166204  | 0.466297  |
| H                                                    | 2.334526  | -0.85219  | 3.134693  | C                                                    | 2.351844  | -1.817274 | -0.317899 |
| H                                                    | 1.439565  | -2.346794 | 2.770211  | C                                                    | 2.499903  | 0.316291  | -1.66837  |
| H                                                    | 3.109272  | -2.128739 | 2.209835  | H                                                    | -1.61497  | -0.314281 | 1.561262  |
| C                                                    | 4.703752  | 0.496761  | -0.56647  | C                                                    | 0.172985  | -0.509334 | 2.720994  |
| H                                                    | 4.146475  | -1.45027  | 0.138418  | C                                                    | -0.864803 | -2.301533 | 1.266675  |
| H                                                    | 5.677518  | 0.167905  | -0.913935 | H                                                    | 0.017563  | 2.228058  | -1.155796 |
| C                                                    | 4.319957  | 1.824118  | -0.722304 | C                                                    | 0.90612   | 2.728097  | 0.72494   |
| H                                                    | 4.995291  | 2.535685  | -1.185322 | C                                                    | -1.55668  | 2.374762  | 0.292612  |
| C                                                    | 3.069044  | 2.234478  | -0.280479 | H                                                    | 2.121168  | -2.266667 | 0.649822  |
| H                                                    | 2.76478   | 3.269959  | -0.391764 | H                                                    | 1.849046  | -2.404936 | -1.09417  |
| H                                                    | 1.234267  | 1.644485  | 0.671261  | H                                                    | 3.426505  | -1.938577 | -0.484563 |
| H                                                    | -2.664808 | -2.015004 | -1.006862 | H                                                    | 3.588082  | 0.219938  | -1.72504  |
| C                                                    | -4.069767 | -0.556387 | -0.215318 | H                                                    | 2.09809   | -0.178164 | -2.559455 |
| H                                                    | -4.933926 | -1.206651 | -0.317196 | H                                                    | 2.265762  | 1.382389  | -1.734568 |
| C                                                    | -4.241118 | 0.736617  | 0.278605  | H                                                    | 0.282703  | 0.559704  | 2.923594  |
| C                                                    | -3.119027 | 1.563973  | 0.376148  | H                                                    | -0.33371  | -0.950139 | 3.584699  |
| C                                                    | -5.593566 | 1.228955  | 0.705324  | H                                                    | 1.17404   | -0.949329 | 2.675904  |
| H                                                    | -3.235943 | 2.58116   | 0.738995  | H                                                    | -1.383879 | -2.698696 | 2.144308  |
| H                                                    | -6.393411 | 0.648031  | 0.241097  | H                                                    | -1.48234  | -2.540117 | 0.396071  |
| H                                                    | -5.737825 | 2.279562  | 0.44044   | H                                                    | 0.073378  | -2.853225 | 1.174521  |
| H                                                    | -5.713384 | 1.146621  | 1.791291  | H                                                    | 0.749627  | 3.803357  | 0.597335  |
| H                                                    | -1.003107 | 1.774032  | 0.067235  | H                                                    | 0.817294  | 2.518044  | 1.794873  |
|                                                      |           |           |           | H                                                    | 1.933992  | 2.512605  | 0.422288  |

|                                                      |           |           |           |                                                      |           |           |           |
|------------------------------------------------------|-----------|-----------|-----------|------------------------------------------------------|-----------|-----------|-----------|
|                                                      | H         | -2.321649 | 1.928641  | -0.348468                                            |           |           |           |
|                                                      | H         | -1.782779 | 2.115468  | 1.33158                                              |           |           |           |
|                                                      | H         | -1.663408 | 3.460009  | 0.203534                                             |           |           |           |
| <b>TS1</b>                                           |           |           |           | <b>4</b>                                             |           |           |           |
| Thermal correction to Gibbs Free Energy=<br>0.536817 |           |           |           | Thermal correction to Gibbs Free Energy=<br>0.539787 |           |           |           |
| E(RBMK) = -1853.82943173                             |           |           |           | E(RBMK) = -1853.88190649                             |           |           |           |
| Frequency -165.3553                                  |           |           |           |                                                      |           |           |           |
| C                                                    | -1.233179 | -0.572175 | -1.773578 | C                                                    | -0.699049 | -0.869889 | 2.896476  |
| O                                                    | 0.213021  | 0.505277  | 0.002682  | C                                                    | 2.593346  | -2.437639 | 1.169946  |
| C                                                    | -0.594008 | -1.674065 | -1.94336  | C                                                    | -0.656095 | -0.50638  | 1.618622  |
| C                                                    | -2.077455 | 0.491317  | -1.760855 | H                                                    | 0.037264  | -0.51077  | 3.604143  |
| S                                                    | 1.642038  | 0.000575  | -0.216295 | H                                                    | -1.507455 | -1.492441 | 3.258971  |
| H                                                    | -0.220575 | -2.289924 | -1.127626 | C                                                    | 2.557333  | -1.090778 | 1.249492  |
| H                                                    | -0.386625 | -1.995666 | -2.963051 | C                                                    | 1.93802   | -3.202988 | 0.089134  |
| H                                                    | -2.958832 | 0.307783  | -2.387897 | C                                                    | 3.358245  | -3.215311 | 2.189248  |
| H                                                    | -1.614164 | 1.473189  | -1.856698 | O                                                    | 0.371036  | 0.409458  | 1.283268  |
| Si                                                   | -3.187389 | 0.587117  | -0.013072 | C                                                    | -1.598351 | -0.841193 | 0.528848  |
| C                                                    | 2.156225  | -0.681014 | 1.341223  | S                                                    | 1.515819  | -0.164024 | 0.208851  |
| C                                                    | 2.701318  | 1.444269  | -0.225014 | H                                                    | 3.080796  | -0.525308 | 2.01295   |
| C                                                    | 2.259021  | -2.000307 | 1.553497  | C                                                    | 1.019897  | -4.211816 | 0.396365  |
| H                                                    | 2.28523   | 0.04913   | 2.13499   | C                                                    | 2.2597    | -2.955569 | -1.249369 |
| C                                                    | 2.075438  | -3.010857 | 0.480967  | H                                                    | 4.153666  | -3.783393 | 1.696559  |
| C                                                    | 2.570868  | -2.526147 | 2.921035  | H                                                    | 3.790594  | -2.580097 | 2.962711  |
| C                                                    | 1.077814  | -3.984479 | 0.60237   | H                                                    | 2.701806  | -3.952436 | 2.662601  |
| C                                                    | 2.902757  | -3.031869 | -0.644304 | H                                                    | -2.220511 | -1.675517 | 0.86479   |
| H                                                    | 3.501603  | -3.101769 | 2.896287  | H                                                    | -1.057641 | -1.202879 | -0.355915 |
| H                                                    | 2.667844  | -1.724078 | 3.653776  | Si                                                   | -2.805724 | 0.566991  | -0.026984 |
| H                                                    | 1.788133  | -3.21394  | 3.256542  | C                                                    | 2.379424  | 1.34707   | -0.048774 |
| C                                                    | 0.895049  | -4.936378 | -0.393586 | C                                                    | 0.410061  | -4.932127 | -0.620066 |
| H                                                    | 0.435882  | -3.993198 | 1.477619  | H                                                    | 0.76099   | -4.414617 | 1.430256  |
| C                                                    | 2.727356  | -3.992576 | -1.632699 | C                                                    | 1.661331  | -3.693608 | -2.261855 |
| H                                                    | 3.70566   | -2.307343 | -0.728308 | H                                                    | 3.016001  | -2.215235 | -1.492056 |
| C                                                    | -4.872575 | 1.099217  | -0.719311 | C                                                    | 2.756105  | 2.164101  | 1.017184  |
| C                                                    | -2.352547 | 1.862863  | 1.100386  | C                                                    | 2.662847  | 1.68847   | -1.366817 |
| C                                                    | -3.274151 | -1.156148 | 0.730634  | H                                                    | 2.491713  | 1.907178  | 2.03643   |
| C                                                    | 2.275472  | 2.616078  | 0.385016  | C                                                    | 3.439016  | 3.33303   | 0.741333  |
| C                                                    | 3.928608  | 1.374519  | -0.872743 | C                                                    | 3.362077  | 2.861245  | -1.615407 |
| H                                                    | 0.116193  | -5.683909 | -0.286739 | H                                                    | 2.342251  | 1.055199  | -2.187    |
| C                                                    | 1.719869  | -4.942824 | -1.513599 | H                                                    | 3.728119  | 3.982855  | 1.561089  |
| H                                                    | 3.388517  | -4.005944 | -2.492508 | C                                                    | 3.760387  | 3.698597  | -0.573546 |
| H                                                    | -5.507405 | 1.100982  | 0.180815  | H                                                    | 3.591882  | 3.134148  | -2.639708 |
| C                                                    | -4.918078 | 2.503883  | -1.32354  | C                                                    | -4.297667 | -0.314494 | -0.816378 |
| C                                                    | -5.459061 | 0.071744  | -1.691347 | C                                                    | -1.882254 | 1.739523  | -1.214836 |



|                                                      |           |           |           |                                                      |           |           |           |
|------------------------------------------------------|-----------|-----------|-----------|------------------------------------------------------|-----------|-----------|-----------|
| H                                                    | -1.510307 | 1.317721  | 1.542538  | C                                                    | -3.367697 | 1.506347  | 1.536697  |
| C                                                    | -3.339235 | 2.246924  | 2.214487  | H                                                    | -5.013573 | 0.491863  | -1.031272 |
| C                                                    | -1.776259 | 3.100147  | 0.412436  | C                                                    | -3.997744 | -1.031459 | -2.135036 |
| H                                                    | -3.284954 | -1.843644 | -0.12786  | C                                                    | -4.971115 | -1.277854 | 0.167921  |
| C                                                    | -4.570926 | -1.387087 | 1.519633  | H                                                    | -1.156813 | 2.253431  | -0.566568 |
| C                                                    | -2.058101 | -1.489849 | 1.600482  | C                                                    | -2.816724 | 2.80604   | -1.796946 |
| H                                                    | 1.297526  | 2.652827  | 0.85254   | C                                                    | -1.092617 | 1.062352  | -2.337966 |
| C                                                    | 3.106844  | 3.726298  | 0.35951   | H                                                    | -3.426054 | 0.73359   | 2.318366  |
| C                                                    | 4.748678  | 2.493604  | -0.882943 | C                                                    | -4.757338 | 2.142051  | 1.416635  |
| H                                                    | 4.241556  | 0.462335  | -1.371229 | C                                                    | -2.350513 | 2.55348   | 2.003548  |
| H                                                    | 1.588991  | -5.69736  | -2.281644 | H                                                    | -0.313203 | -5.701504 | -0.373535 |
| H                                                    | 2.778834  | 4.648112  | 0.830102  | C                                                    | 0.730728  | -4.676754 | -1.949404 |
| C                                                    | 4.355475  | 3.683459  | -0.266076 | H                                                    | 1.9314    | -3.507803 | -3.295502 |
| H                                                    | 5.70743   | 2.44646   | -1.389635 | H                                                    | -3.679982 | -0.341998 | -2.920663 |
| C                                                    | 5.258262  | 4.880355  | -0.2623   | H                                                    | -3.215691 | -1.790997 | -2.01942  |
| H                                                    | 5.916757  | 4.860565  | 0.612857  | H                                                    | -4.891763 | -1.548438 | -2.501527 |
| H                                                    | 4.688517  | 5.810947  | -0.222565 | H                                                    | -5.918733 | -1.64485  | -0.240785 |
| H                                                    | 5.894195  | 4.904384  | -1.149599 | H                                                    | -4.347803 | -2.159722 | 0.354033  |
| H                                                    | -4.650551 | 3.278227  | -0.601549 | H                                                    | -5.18991  | -0.81732  | 1.135812  |
| H                                                    | -4.24711  | 2.602349  | -2.184804 | H                                                    | -3.318242 | 3.388497  | -1.019594 |
| H                                                    | -5.92765  | 2.728123  | -1.683119 | H                                                    | -2.259963 | 3.511892  | -2.423762 |
| H                                                    | -6.505049 | 0.309885  | -1.90871  | H                                                    | -3.592999 | 2.35895   | -2.426967 |
| H                                                    | -4.941152 | 0.083718  | -2.658937 | H                                                    | -0.484153 | 1.79998   | -2.8749   |
| H                                                    | -5.428168 | -0.952598 | -1.310413 | H                                                    | -0.418085 | 0.278848  | -1.976183 |
| H                                                    | -3.712966 | 1.380545  | 2.768776  | H                                                    | -1.751408 | 0.597378  | -3.075871 |
| H                                                    | -2.84352  | 2.901249  | 2.939206  | H                                                    | -5.044901 | 2.608189  | 2.365543  |
| H                                                    | -4.204372 | 2.794319  | 1.826932  | H                                                    | -4.780284 | 2.928623  | 0.655866  |
| H                                                    | -1.359663 | 3.777984  | 1.16597   | H                                                    | -5.534451 | 1.41724   | 1.161684  |
| H                                                    | -0.961516 | 2.835508  | -0.265509 | H                                                    | -1.346088 | 2.142331  | 2.135492  |
| H                                                    | -2.527498 | 3.668479  | -0.142652 | H                                                    | -2.2778   | 3.380374  | 1.289128  |
| H                                                    | -4.598368 | -2.415176 | 1.895142  | H                                                    | -2.658198 | 2.984777  | 2.962632  |
| H                                                    | -4.637475 | -0.72898  | 2.391431  | H                                                    | 0.263407  | -5.252851 | -2.740338 |
| H                                                    | -5.471123 | -1.236359 | 0.919253  | C                                                    | 4.508279  | 4.967193  | -0.840818 |
| H                                                    | -1.106901 | -1.271583 | 1.109289  | H                                                    | 5.489432  | 4.946417  | -0.356897 |
| H                                                    | -2.0758   | -0.909567 | 2.528661  | H                                                    | 3.967745  | 5.828388  | -0.437387 |
| H                                                    | -2.075331 | -2.548257 | 1.882088  | H                                                    | 4.659598  | 5.129032  | -1.908579 |
| <b>TS2</b>                                           |           |           |           | <b>5</b>                                             |           |           |           |
| Thermal correction to Gibbs Free Energy=<br>0.541440 |           |           |           | Thermal correction to Gibbs Free Energy=<br>0.549024 |           |           |           |
| E(RBMK) = -1853.86415730                             |           |           |           | E(RBMK) = -1853.96022140                             |           |           |           |
| Frequency -186.2971                                  |           |           |           |                                                      |           |           |           |
| C                                                    | 0.245223  | 0.63169   | 2.258772  | C                                                    | -0.211848 | -2.023675 | 1.071705  |
| C                                                    | -1.137936 | 2.785324  | 1.195478  | C                                                    | 1.319843  | -1.84871  | 1.13935   |
| C                                                    | 0.327699  | 0.06356   | 1.00713   | C                                                    | -0.633634 | -1.133849 | -0.04055  |

|    |           |           |           |    |           |           |           |
|----|-----------|-----------|-----------|----|-----------|-----------|-----------|
| H  | -0.623207 | 0.439014  | 2.875532  | H  | -0.688412 | -1.651286 | 1.988404  |
| H  | 1.103982  | 1.109159  | 2.718734  | H  | -0.544393 | -3.05313  | 0.928765  |
| C  | -2.106706 | 1.846866  | 0.902074  | C  | 1.464916  | -0.420756 | 0.560186  |
| C  | -0.161859 | 3.303228  | 0.218168  | C  | 2.024302  | -2.881577 | 0.259679  |
| C  | -1.27357  | 3.540819  | 2.482581  | C  | 1.816086  | -1.85569  | 2.584477  |
| O  | -0.743272 | -0.545552 | 0.565787  | O  | 0.261528  | -0.2698   | -0.336917 |
| C  | 1.514087  | 0.16186   | 0.129112  | C  | -1.880214 | -1.148791 | -0.725298 |
| S  | -1.975739 | 0.776113  | -0.398719 | S  | 2.96648   | -0.092951 | -0.331814 |
| H  | -2.891283 | 1.627267  | 1.618089  | H  | 1.312895  | 0.349978  | 1.319118  |
| C  | 1.129428  | 3.664767  | 0.622728  | C  | 1.427239  | -3.372703 | -0.905463 |
| C  | -0.537228 | 3.537965  | -1.110826 | C  | 3.30577   | -3.336162 | 0.578082  |
| H  | -1.691777 | 4.529655  | 2.260597  | H  | 2.855318  | -1.528576 | 2.649687  |
| H  | -1.924375 | 3.035188  | 3.196547  | H  | 1.218178  | -1.176754 | 3.198975  |
| H  | -0.302356 | 3.716405  | 2.948151  | H  | 1.74732   | -2.858797 | 3.010465  |
| H  | 2.176386  | 0.963265  | 0.46642   | H  | -2.370461 | -2.119719 | -0.648861 |
| H  | 1.188783  | 0.401583  | -0.891039 | H  | -1.783897 | -0.809405 | -1.759353 |
| Si | 2.605115  | -1.430723 | -0.015271 | Si | -3.220096 | 0.150012  | -0.012473 |
| C  | -3.395374 | -0.248427 | -0.298464 | C  | 2.995314  | 1.691146  | -0.24954  |
| C  | 2.028773  | 4.205457  | -0.28124  | C  | 2.086054  | -4.278327 | -1.725767 |
| H  | 1.441667  | 3.499261  | 1.648417  | H  | 0.4286    | -3.062333 | -1.199277 |
| C  | 0.36179   | 4.092303  | -2.0114   | C  | 3.965184  | -4.24604  | -0.238298 |
| H  | -1.554035 | 3.339069  | -1.430097 | H  | 3.808191  | -2.981799 | 1.469514  |
| C  | -3.802736 | -0.845115 | 0.895101  | C  | 2.433017  | 2.445207  | -1.276735 |
| C  | -4.07216  | -0.487167 | -1.49328  | C  | 3.63512   | 2.331282  | 0.810473  |
| H  | -3.229859 | -0.708352 | 1.804325  | H  | 1.958032  | 1.946785  | -2.114543 |
| C  | -4.923769 | -1.652811 | 0.885215  | C  | 2.495477  | 3.831006  | -1.227455 |
| C  | -5.196126 | -1.298127 | -1.476933 | C  | 3.687     | 3.71701   | 0.848134  |
| H  | -3.73463  | -0.036701 | -2.42068  | H  | 4.098856  | 1.745817  | 1.597289  |
| H  | -5.244816 | -2.124593 | 1.808382  | H  | 2.057428  | 4.412306  | -2.033103 |
| C  | -5.642326 | -1.890181 | -0.294372 | C  | 3.121799  | 4.490144  | -0.168369 |
| H  | -5.73472  | -1.475899 | -2.401539 | H  | 4.187276  | 4.208148  | 1.677192  |
| C  | 4.142159  | -0.891801 | -1.001529 | C  | -4.833299 | -0.474204 | -0.787316 |
| C  | 1.59756   | -2.810179 | -0.853085 | C  | -2.657829 | 1.875243  | -0.562937 |
| C  | 3.124608  | -1.93656  | 1.752832  | C  | -3.261567 | -0.013843 | 1.884134  |
| H  | 4.805258  | -1.768595 | -0.976172 | H  | -5.590928 | 0.191329  | -0.345815 |
| C  | 3.872392  | -0.55999  | -2.47087  | C  | -4.91157  | -0.322843 | -2.308009 |
| C  | 4.88093   | 0.266054  | -0.321699 | C  | -5.174015 | -1.906944 | -0.365327 |
| H  | 0.901016  | -3.152035 | -0.074308 | H  | -1.864962 | 2.156487  | 0.144217  |
| C  | 2.488057  | -3.999556 | -1.231905 | C  | -3.810029 | 2.875286  | -0.383174 |
| C  | 0.746898  | -2.363786 | -2.045116 | C  | -2.061866 | 1.96906   | -1.970024 |
| H  | 3.264122  | -0.984601 | 2.288747  | H  | -3.095789 | -1.081519 | 2.095559  |
| C  | 4.457203  | -2.691411 | 1.815034  | C  | -4.62763  | 0.353334  | 2.480239  |
| C  | 2.039929  | -2.729843 | 2.489593  | C  | -2.159405 | 0.794596  | 2.577817  |
| H  | 3.028971  | 4.467058  | 0.045961  | H  | 1.598964  | -4.643186 | -2.623355 |

|                                                      |           |           |           |                                                      |           |           |           |
|------------------------------------------------------|-----------|-----------|-----------|------------------------------------------------------|-----------|-----------|-----------|
| C                                                    | 1.648344  | 4.41872   | -1.602958 | C                                                    | 3.359629  | -4.720004 | -1.39366  |
| H                                                    | 0.048848  | 4.284108  | -3.031663 | H                                                    | 4.958391  | -4.585221 | 0.034531  |
| H                                                    | 3.478385  | -1.415484 | -3.024663 | H                                                    | -4.80669  | 0.715164  | -2.631922 |
| H                                                    | 3.158928  | 0.265382  | -2.578354 | H                                                    | -4.143679 | -0.91453  | -2.819086 |
| H                                                    | 4.797191  | -0.248626 | -2.969694 | H                                                    | -5.879698 | -0.680427 | -2.67365  |
| H                                                    | 5.840525  | 0.454619  | -0.815349 | H                                                    | -6.193752 | -2.160365 | -0.671669 |
| H                                                    | 4.304857  | 1.196396  | -0.385261 | H                                                    | -4.515556 | -2.63651  | -0.850017 |
| H                                                    | 5.090296  | 0.075896  | 0.735373  | H                                                    | -5.110928 | -2.06411  | 0.715391  |
| H                                                    | 3.036423  | -4.401244 | -0.374988 | H                                                    | -4.20489  | 2.886089  | 0.637093  |
| H                                                    | 1.885463  | -4.816943 | -1.643283 | H                                                    | -3.467919 | 3.890659  | -0.607659 |
| H                                                    | 3.224288  | -3.726396 | -1.995202 | H                                                    | -4.643203 | 2.65863   | -1.059092 |
| H                                                    | 0.175167  | -3.211614 | -2.439813 | H                                                    | -1.79015  | 3.006935  | -2.189603 |
| H                                                    | 0.028715  | -1.590592 | -1.76045  | H                                                    | -1.150679 | 1.373608  | -2.074764 |
| H                                                    | 1.354878  | -1.977381 | -2.868108 | H                                                    | -2.766702 | 1.653418  | -2.744331 |
| H                                                    | 4.728804  | -2.901438 | 2.855529  | H                                                    | -4.618731 | 0.204098  | 3.564829  |
| H                                                    | 4.399432  | -3.655754 | 1.300505  | H                                                    | -4.875848 | 1.404456  | 2.304434  |
| H                                                    | 5.282511  | -2.130384 | 1.369314  | H                                                    | -5.44141  | -0.252167 | 2.074679  |
| H                                                    | 1.067866  | -2.227875 | 2.488816  | H                                                    | -1.157938 | 0.61433   | 2.170633  |
| H                                                    | 1.898278  | -3.716882 | 2.037541  | H                                                    | -2.345208 | 1.868909  | 2.487162  |
| H                                                    | 2.325064  | -2.89396  | 3.534818  | H                                                    | -2.125423 | 0.564011  | 3.647848  |
| H                                                    | 2.349838  | 4.851533  | -2.307489 | H                                                    | 3.874083  | -5.432153 | -2.029111 |
| C                                                    | -6.841418 | -2.785393 | -0.281857 | C                                                    | 3.223011  | 5.98584   | -0.141144 |
| H                                                    | -7.406394 | -2.715205 | -1.212163 | H                                                    | 2.422196  | 6.452631  | -0.718086 |
| H                                                    | -7.508937 | -2.538076 | 0.547569  | H                                                    | 4.174178  | 6.312538  | -0.574921 |
| H                                                    | -6.536425 | -3.829078 | -0.151781 | H                                                    | 3.181647  | 6.370874  | 0.88016   |
| <b>6</b>                                             |           |           |           | <b>TS3</b>                                           |           |           |           |
| Thermal correction to Gibbs Free Energy=<br>0.541223 |           |           |           | Thermal correction to Gibbs Free Energy=<br>0.541935 |           |           |           |
| E(RBMK) = -1853.88100611                             |           |           |           | E(RBMK) = -1853.85060499                             |           |           |           |
| Frequency                                            |           |           |           | Frequency -152.2592                                  |           |           |           |
| C                                                    | -0.214176 | -2.374896 | -1.736281 | C                                                    | 0.731349  | 1.487636  | -1.704387 |
| C                                                    | 3.224023  | -1.959807 | -0.920803 | C                                                    | -1.043282 | 3.183045  | -0.766979 |
| C                                                    | -0.235194 | -1.360216 | -0.877464 | C                                                    | 0.599991  | 0.522648  | -0.703739 |
| C                                                    | 2.6993    | -1.229194 | 0.14689   | C                                                    | -1.267254 | 2.439788  | 0.411679  |
| C                                                    | 3.979168  | -3.0831   | -0.646926 | C                                                    | -0.344893 | 4.392105  | -0.69474  |
| C                                                    | -1.068677 | -1.194429 | 0.340936  | C                                                    | 1.634486  | 0.289236  | 0.333844  |
| C                                                    | 2.900756  | -1.626303 | 1.46561   | C                                                    | -0.66127  | 2.857333  | 1.613038  |
| C                                                    | 4.22057   | -3.496418 | 0.671501  | C                                                    | 0.209539  | 4.833248  | 0.495638  |
| C                                                    | 2.738031  | 1.202363  | -1.104445 | C                                                    | -3.278255 | 0.979792  | -0.774975 |
| C                                                    | 3.669855  | -2.753711 | 1.715869  | C                                                    | 0.050555  | 4.031646  | 1.64647   |
| C                                                    | 5.048914  | -4.713768 | 0.93843   | C                                                    | 0.953942  | 6.127017  | 0.582703  |
| C                                                    | -3.612666 | -0.310095 | 1.79568   | C                                                    | 3.786874  | -1.467019 | 1.610184  |
| C                                                    | -2.886096 | 0.989023  | -0.92949  | C                                                    | 1.803698  | -2.726415 | -0.436624 |
| C                                                    | -3.788136 | -2.023663 | -0.905572 | C                                                    | 3.960077  | -0.699855 | -1.489044 |

|    |           |           |           |    |           |           |           |
|----|-----------|-----------|-----------|----|-----------|-----------|-----------|
| C  | 2.779113  | 2.545539  | -0.976    | C  | -4.222847 | 0.014619  | -0.916504 |
| C  | -2.810448 | 0.766411  | 2.535466  | C  | 2.828077  | -1.751681 | 2.771572  |
| C  | -3.773171 | -1.549984 | 2.678531  | C  | 4.770106  | -0.358626 | 1.992612  |
| C  | -4.131595 | 1.857614  | -0.720849 | C  | 2.48651   | -4.046736 | -0.061175 |
| C  | -2.622968 | 0.788228  | -2.42557  | C  | 1.34822   | -2.769934 | -1.899291 |
| C  | -5.277501 | -1.716242 | -1.101477 | C  | 5.062193  | -1.740239 | -1.720594 |
| C  | -3.609281 | -3.440831 | -0.352345 | C  | 4.55869   | 0.708353  | -1.434733 |
| C  | 1.841418  | 3.312633  | -0.138629 | C  | -4.224116 | -1.237154 | -0.150667 |
| C  | 3.807502  | 3.312456  | -1.741425 | C  | -5.327975 | 0.240839  | -1.898577 |
| C  | 2.316222  | 4.25995   | 0.775504  | C  | -5.417897 | -1.727047 | 0.399172  |
| C  | 0.461137  | 3.136956  | -0.287733 | C  | -3.044411 | -1.97804  | 0.016973  |
| C  | 1.426868  | 4.988704  | 1.549417  | C  | -5.421751 | -2.902582 | 1.130564  |
| C  | -0.42467  | 3.889082  | 0.473229  | C  | -3.061519 | -3.165639 | 0.735359  |
| C  | 0.055519  | 4.808412  | 1.396855  | C  | -4.24423  | -3.626233 | 1.299145  |
| H  | -4.617829 | 0.0953    | 1.610491  | H  | 4.37158   | -2.380962 | 1.43191   |
| H  | 0.439848  | -2.359815 | -2.598218 | H  | 0.0212    | 1.479321  | -2.521638 |
| H  | -0.889328 | -3.211735 | -1.611899 | H  | 1.617288  | 2.106103  | -1.79693  |
| H  | 3.03256   | -1.663733 | -1.946241 | H  | -1.539033 | 2.916234  | -1.690984 |
| O  | 0.585254  | -0.267913 | -1.234438 | O  | -0.487979 | -0.151739 | -0.692558 |
| S  | 1.723769  | 0.21818   | -0.092683 | S  | -2.099807 | 0.937333  | 0.481344  |
| H  | 4.389351  | -3.660273 | -1.469432 | H  | -0.236577 | 4.989143  | -1.594086 |
| H  | -1.104721 | -2.140247 | 0.890275  | H  | 2.244936  | 1.181359  | 0.500344  |
| H  | -0.626469 | -0.454557 | 1.017345  | H  | 1.135398  | 0.026266  | 1.272314  |
| Si | -2.90233  | -0.644823 | 0.06033   | Si | 2.846735  | -1.180366 | -0.020483 |
| H  | 2.471729  | -1.060463 | 2.286019  | H  | -0.795968 | 2.271539  | 2.516467  |
| H  | 3.401042  | 0.653331  | -1.762187 | H  | -3.295033 | 1.86883   | -1.392101 |
| H  | -2.670498 | 1.676298  | 1.943747  | H  | 2.094402  | -2.529425 | 2.538599  |
| H  | -2.03094  | 1.541234  | -0.511801 | H  | 0.902392  | -2.628625 | 0.186754  |
| H  | -3.313651 | -1.997248 | -1.897958 | H  | 3.287868  | -0.734904 | -2.35982  |
| H  | 3.312564  | 4.021753  | -2.411775 | H  | -5.360523 | -0.579938 | -2.621351 |
| H  | 4.465041  | 2.664255  | -2.321075 | H  | -5.218808 | 1.185691  | -2.431899 |
| H  | 4.418405  | 3.908315  | -1.055961 | H  | -6.297147 | 0.248563  | -1.389639 |
| H  | 3.383152  | 4.409361  | 0.902226  | H  | -6.341198 | -1.170826 | 0.282201  |
| H  | 0.083237  | 2.452302  | -1.041268 | H  | -2.126752 | -1.654116 | -0.462381 |
| H  | 1.804097  | 5.706817  | 2.268915  | H  | -6.346902 | -3.259804 | 1.568945  |
| H  | -1.492964 | 3.766521  | 0.331241  | H  | -2.14772  | -3.740124 | 0.840664  |
| H  | -0.637309 | 5.394596  | 1.990397  | H  | -4.254633 | -4.554382 | 1.86004   |
| H  | 3.839925  | -3.06344  | 2.741357  | H  | 0.483464  | 4.361586  | 2.585471  |
| H  | -1.817161 | 0.399884  | 2.819051  | H  | 2.275733  | -0.850516 | 3.06107   |
| H  | -3.315687 | 1.054446  | 3.463775  | H  | 3.382058  | -2.079666 | 3.657748  |
| H  | -4.151227 | -1.268625 | 3.667835  | H  | 5.243764  | -0.582558 | 2.955066  |
| H  | -2.820462 | -2.068042 | 2.837351  | H  | 4.271833  | 0.611673  | 2.101019  |
| H  | -4.476929 | -2.271055 | 2.257426  | H  | 5.570766  | -0.241827 | 1.258572  |
| H  | -4.030347 | 2.80751   | -1.25885  | H  | 1.823121  | -4.892326 | -0.275356 |

|                                                      |           |           |           |                                                      |          |           |           |
|------------------------------------------------------|-----------|-----------|-----------|------------------------------------------------------|----------|-----------|-----------|
| H                                                    | -4.312108 | 2.093045  | 0.331561  | H                                                    | 2.75198  | -4.100683 | 0.997649  |
| H                                                    | -5.033758 | 1.372951  | -1.105509 | H                                                    | 3.402634 | -4.209032 | -0.637719 |
| H                                                    | -1.707595 | 0.224034  | -2.622801 | H                                                    | 0.802562 | -1.871967 | -2.200307 |
| H                                                    | -2.532898 | 1.75473   | -2.935173 | H                                                    | 0.68393  | -3.625246 | -2.067902 |
| H                                                    | -3.449106 | 0.25302   | -2.904525 | H                                                    | 2.198654 | -2.889213 | -2.578484 |
| H                                                    | -5.444316 | -0.764823 | -1.613503 | H                                                    | 4.660933 | -2.746156 | -1.871767 |
| H                                                    | -5.809915 | -1.676394 | -0.145146 | H                                                    | 5.756245 | -1.785163 | -0.874586 |
| H                                                    | -5.755685 | -2.496479 | -1.703754 | H                                                    | 5.652145 | -1.488906 | -2.608887 |
| H                                                    | -4.140653 | -3.577592 | 0.592854  | H                                                    | 5.2803   | 0.81522   | -0.620722 |
| H                                                    | -2.562543 | -3.706299 | -0.174405 | H                                                    | 3.801454 | 1.487139  | -1.299912 |
| H                                                    | -4.015612 | -4.17659  | -1.055157 | H                                                    | 5.090746 | 0.932612  | -2.36599  |
| H                                                    | 5.118771  | -4.92842  | 2.00528   | H                                                    | 1.977872 | 5.962578  | 0.932426  |
| H                                                    | 6.06356   | -4.582577 | 0.550176  | H                                                    | 0.475067 | 6.799463  | 1.30104   |
| H                                                    | 4.623814  | -5.589643 | 0.439687  | H                                                    | 0.998778 | 6.634139  | -0.381654 |
| <b>7</b>                                             |           |           |           | <b>8</b>                                             |          |           |           |
| Thermal correction to Gibbs Free Energy=<br>0.546175 |           |           |           | Thermal correction to Gibbs Free Energy=<br>0.524316 |          |           |           |
| E(RBMK) = -1853.91809514                             |           |           |           | E(RBMK) = -1932.07017508                             |          |           |           |
| C                                                    | 0.385708  | 1.678901  | 1.235878  | C                                                    | 1.475655 | -1.648969 | -0.769903 |
| C                                                    | -0.583953 | 2.84349   | 0.916968  | C                                                    | 2.105826 | -0.71167  | -0.262784 |
| C                                                    | 1.306676  | 1.402291  | 0.051819  | C                                                    | 2.873831 | 0.346258  | 0.289578  |
| H                                                    | -0.168164 | 0.760088  | 1.45916   | C                                                    | 5.565367 | 1.71158   | 0.659716  |
| H                                                    | 0.957576  | 1.922779  | 2.135232  | C                                                    | 5.277238 | -1.313842 | 1.339957  |
| C                                                    | -1.483677 | 2.572398  | -0.242579 | C                                                    | 5.16199  | -0.40975  | -1.698335 |
| C                                                    | 0.168479  | 4.125465  | 0.81937   | C                                                    | 5.196499 | 2.054124  | 2.106789  |
| H                                                    | -1.229728 | 2.93789   | 1.808654  | C                                                    | 5.274196 | 2.892057  | -0.268978 |
| O                                                    | 0.931179  | 1.726637  | -1.056539 | C                                                    | 6.773169 | -1.329443 | 1.676501  |
| C                                                    | 2.603804  | 0.737678  | 0.312234  | C                                                    | 4.81038  | -2.707888 | 0.911477  |
| S                                                    | -2.594215 | 1.293563  | -0.335037 | C                                                    | 6.658896 | -0.311276 | -2.019064 |
| C                                                    | -1.539418 | 3.479542  | -1.319684 | C                                                    | 4.334254 | 0.356381  | -2.735482 |
| C                                                    | 0.082207  | 4.978502  | -0.221216 | H                                                    | 6.649533 | 1.526791  | 0.627624  |
| H                                                    | 0.817627  | 4.35426   | 1.660709  | H                                                    | 1.444119 | -2.596215 | -1.27367  |
| H                                                    | 2.944449  | 0.899604  | 1.338717  | H                                                    | 2.663788 | 1.290164  | -0.224581 |
| H                                                    | 3.338036  | 1.163991  | -0.378898 | H                                                    | 2.680605 | 0.465006  | 1.360206  |
| Si                                                   | 2.721634  | -1.166231 | -0.041441 | Si                                                   | 4.811846 | 0.058019  | 0.107888  |
| C                                                    | -2.658608 | 0.557892  | 1.252131  | H                                                    | 5.433448 | 1.247513  | 2.806513  |
| C                                                    | -0.793426 | 4.621249  | -1.303424 | H                                                    | 4.737699 | -1.05149  | 2.262559  |
| H                                                    | -2.199496 | 3.271432  | -2.154916 | H                                                    | 4.877653 | -1.469811 | -1.771413 |
| C                                                    | 0.84994   | 6.260694  | -0.298418 | H                                                    | 4.129019 | 2.281977  | 2.207027  |
| C                                                    | 4.535578  | -1.612494 | 0.317492  | H                                                    | 5.740123 | 2.944391  | 2.440015  |
| C                                                    | 2.355959  | -1.442312 | -1.894731 | H                                                    | 5.755691 | 3.800433  | 0.108851  |
| C                                                    | 1.453754  | -2.076409 | 1.052609  | H                                                    | 4.201741 | 3.108944  | -0.335507 |
| C                                                    | -3.206175 | -0.656033 | 1.457278  | H                                                    | 5.644821 | 2.726605  | -1.283322 |
| H                                                    | -2.40115  | 1.199888  | 2.087927  | H                                                    | 6.977582 | -2.069359 | 2.457583  |

|   |           |           |           |    |           |           |           |
|---|-----------|-----------|-----------|----|-----------|-----------|-----------|
| H | 4.630461  | -2.652269 | -0.02765  | H  | 7.134703  | -0.363716 | 2.040125  |
| C | 5.495108  | -0.758143 | -0.519275 | H  | 7.380178  | -1.606646 | 0.809181  |
| C | 4.941509  | -1.578899 | 1.792317  | H  | 3.731965  | -2.755184 | 0.734126  |
| H | 2.772165  | -0.555398 | -2.3936   | H  | 5.043457  | -3.443828 | 1.688458  |
| C | 3.058325  | -2.673782 | -2.478573 | H  | 5.31598   | -3.036457 | -0.002414 |
| C | 0.860455  | -1.48428  | -2.221959 | H  | 7.274026  | -0.916388 | -1.347619 |
| H | 0.47787   | -1.785404 | 0.632131  | H  | 7.017147  | 0.721382  | -1.955384 |
| C | 1.573524  | -3.597843 | 0.908596  | H  | 6.854435  | -0.657853 | -3.039323 |
| C | 1.452134  | -1.681411 | 2.532165  | H  | 4.556173  | 1.427186  | -2.728168 |
| C | -3.590046 | -1.568827 | 0.361666  | H  | 3.257105  | 0.236366  | -2.585147 |
| C | -3.456942 | -1.115204 | 2.860535  | H  | 4.560819  | -0.009874 | -3.74267  |
| C | -4.853392 | -2.170878 | 0.354706  | Au | -0.386094 | -0.687083 | -0.291388 |
| C | -2.69295  | -1.870674 | -0.669307 | P  | -2.551105 | 0.068915  | 0.051615  |
| H | -2.959301 | -2.073318 | 3.037709  | C  | -3.166852 | -0.299422 | 1.719647  |
| H | -3.11301  | -0.38934  | 3.598949  | C  | -4.492533 | -0.683114 | 1.927915  |
| H | -4.526271 | -1.282864 | 3.023297  | H  | -5.165479 | -0.804637 | 1.085704  |
| C | -5.218142 | -3.025562 | -0.67469  | C  | -4.946871 | -0.919556 | 3.219756  |
| H | -5.565377 | -1.952254 | 1.143128  | H  | -5.9759   | -1.221994 | 3.379655  |
| C | -3.055793 | -2.739643 | -1.688791 | C  | -4.086595 | -0.772832 | 4.300928  |
| H | -1.693276 | -1.450599 | -0.655709 | H  | -4.444775 | -0.961242 | 5.307147  |
| H | -6.206614 | -3.471417 | -0.677009 | H  | -2.091114 | -0.284746 | 4.938389  |
| C | -4.320854 | -3.313669 | -1.697548 | C  | -2.764363 | -0.392562 | 4.095149  |
| H | -2.344393 | -2.973247 | -2.47344  | C  | -2.301749 | -0.160625 | 2.807989  |
| H | -4.605838 | -3.99075  | -2.495233 | H  | -1.266548 | 0.126418  | 2.647654  |
| H | -0.87459  | 5.303709  | -2.144966 | C  | -2.684682 | 1.866198  | -0.181574 |
| H | 5.239337  | -0.745239 | -1.583095 | C  | -3.424887 | 2.657631  | 0.696879  |
| H | 5.512312  | 0.279784  | -0.169167 | H  | -3.912252 | 2.21134   | 1.557104  |
| H | 6.519164  | -1.136808 | -0.434506 | H  | -4.105681 | 4.639278  | 1.154132  |
| H | 6.006839  | -1.81142  | 1.898434  | C  | -3.532006 | 4.024879  | 0.469009  |
| H | 4.78743   | -0.590469 | 2.239883  | C  | -2.908105 | 4.601455  | -0.629954 |
| H | 4.391727  | -2.30747  | 2.392609  | H  | -2.994666 | 5.668505  | -0.803755 |
| H | 2.86094   | -2.747142 | -3.553705 | H  | -1.678978 | 4.263373  | -2.363262 |
| H | 4.142973  | -2.641863 | -2.349806 | C  | -2.168157 | 3.813371  | -1.506357 |
| H | 2.700587  | -3.603161 | -2.023894 | C  | -2.049873 | 2.449709  | -1.281946 |
| H | 0.340902  | -0.577424 | -1.90135  | H  | -1.467707 | 1.836927  | -1.964414 |
| H | 0.710746  | -1.576128 | -3.303682 | C  | -3.71078  | -0.701117 | -1.115768 |
| H | 0.376143  | -2.350184 | -1.756378 | C  | -3.628502 | -2.079607 | -1.332385 |
| H | 1.469186  | -3.927995 | -0.128385 | H  | -2.866157 | -2.667542 | -0.829089 |
| H | 2.540702  | -3.958357 | 1.274141  | C  | -4.525778 | -2.700637 | -2.188445 |
| H | 0.798379  | -4.106508 | 1.492629  | H  | -4.461037 | -3.770369 | -2.354028 |
| H | 2.35634   | -2.022225 | 3.042034  | C  | -5.501378 | -1.950305 | -2.83764  |
| H | 1.385054  | -0.600317 | 2.688513  | H  | -6.198226 | -2.436677 | -3.511495 |
| H | 0.602778  | -2.141127 | 3.051034  | H  | -6.339561 | 0.00589   | -3.136397 |
| H | 1.507409  | 6.264228  | -1.173043 | C  | -5.581274 | -0.579484 | -2.628165 |

|                                                      |          |           |           |                                                      |           |           |           |
|------------------------------------------------------|----------|-----------|-----------|------------------------------------------------------|-----------|-----------|-----------|
| H                                                    | 0.172737 | 7.114461  | -0.396781 | C                                                    | -4.689325 | 0.049817  | -1.767328 |
| H                                                    | 1.463765 | 6.4135    | 0.589987  | H                                                    | -4.7531   | 1.12097   | -1.6085   |
| <b>TS4</b>                                           |          |           |           | <b>9</b>                                             |           |           |           |
| Thermal correction to Gibbs Free Energy=<br>0.766676 |          |           |           | Thermal correction to Gibbs Free Energy=<br>0.770342 |           |           |           |
| E(RBMK) = -3024.49927195                             |          |           |           | E(RBMK) = -3024.52308069                             |           |           |           |
| Frequency -110.8277                                  |          |           |           |                                                      |           |           |           |
| C                                                    | 1.064803 | 0.679946  | -0.199148 | C                                                    | -0.613166 | -0.465162 | -1.068699 |
| O                                                    | 3.349333 | 0.395642  | -0.217671 | C                                                    | -2.337559 | -3.413915 | 0.304255  |
| C                                                    | 0.582054 | -0.391292 | 0.250812  | C                                                    | -1.602251 | 0.052984  | -0.33799  |
| H                                                    | 0.983675 | -1.267912 | 0.738837  | H                                                    | -0.946714 | -1.008228 | -1.954056 |
| C                                                    | 1.21016  | 2.008177  | -0.707082 | C                                                    | -3.202657 | -2.75227  | -0.488242 |
| S                                                    | 3.726104 | -1.086003 | -0.115979 | C                                                    | -2.071032 | -3.036531 | 1.712021  |
| C                                                    | 4.789783 | -1.194324 | 1.298713  | C                                                    | -1.618471 | -4.613906 | -0.217573 |
| C                                                    | 4.447829 | -1.86663  | 2.405091  | O                                                    | -2.934091 | -0.134799 | -0.850535 |
| C                                                    | 3.225726 | -2.705787 | 2.49401   | C                                                    | -1.567957 | 0.873982  | 0.898799  |
| C                                                    | 5.30547  | -1.805507 | 3.631391  | S                                                    | -3.859104 | -1.219787 | 0.017283  |
| H                                                    | 5.685046 | -0.582248 | 1.234517  | H                                                    | -3.422157 | -3.045944 | -1.509025 |
| C                                                    | 2.216616 | -2.379402 | 3.404197  | C                                                    | -0.784772 | -2.662687 | 2.10965   |
| C                                                    | 3.078175 | -3.845352 | 1.700633  | C                                                    | -3.092717 | -3.097048 | 2.663012  |
| H                                                    | 5.654172 | -2.808797 | 3.896094  | H                                                    | -1.853271 | -5.484867 | 0.40242   |
| H                                                    | 6.168332 | -1.152354 | 3.494372  | H                                                    | -1.86464  | -4.829009 | -1.257929 |
| H                                                    | 4.72232  | -1.442631 | 4.484043  | H                                                    | -0.538469 | -4.454565 | -0.135005 |
| H                                                    | 0.194356 | 2.350418  | -0.946745 | H                                                    | -0.549878 | 0.827714  | 1.294823  |
| H                                                    | 1.786564 | 1.994322  | -1.635815 | H                                                    | -2.216526 | 0.438974  | 1.673282  |
| Si                                                   | 1.896926 | 3.376333  | 0.497764  | Si                                                   | -2.023341 | 2.733642  | 0.700537  |
| C                                                    | 4.944989 | -1.372335 | -1.397229 | C                                                    | -5.352908 | -1.077811 | -0.907253 |
| C                                                    | 1.072937 | -3.161868 | 3.496385  | C                                                    | -0.533995 | -2.333658 | 3.43387   |
| H                                                    | 2.319406 | -1.498525 | 4.029956  | H                                                    | 0.007351  | -2.585412 | 1.371957  |
| C                                                    | 1.939699 | -4.634972 | 1.804345  | C                                                    | -2.832318 | -2.780888 | 3.990507  |
| H                                                    | 3.874759 | -4.125339 | 1.018982  | H                                                    | -4.085217 | -3.421412 | 2.36563   |
| C                                                    | 5.666119 | -0.302899 | -1.910546 | C                                                    | -5.339058 | -1.036676 | -2.300488 |
| C                                                    | 5.135041 | -2.663446 | -1.873062 | C                                                    | -6.538594 | -0.994953 | -0.186931 |
| H                                                    | 5.475173 | 0.698988  | -1.541826 | H                                                    | -4.401671 | -1.055729 | -2.844312 |
| C                                                    | 6.605546 | -0.542213 | -2.902331 | C                                                    | -6.54421  | -0.928379 | -2.969169 |
| C                                                    | 6.082889 | -2.883754 | -2.862517 | C                                                    | -7.736238 | -0.898919 | -0.882237 |
| H                                                    | 4.550038 | -3.489614 | -1.481153 | H                                                    | -6.531416 | -1.002616 | 0.897748  |
| H                                                    | 7.175314 | 0.288921  | -3.306813 | H                                                    | -6.545693 | -0.885685 | -4.053736 |
| C                                                    | 6.831529 | -1.831066 | -3.392405 | C                                                    | -7.760354 | -0.865086 | -2.276111 |
| H                                                    | 6.239338 | -3.890988 | -3.235783 | H                                                    | -8.667228 | -0.838166 | -0.32881  |
| C                                                    | 0.911971 | 4.941082  | 0.030704  | C                                                    | -1.327344 | 3.624562  | 2.238522  |
| C                                                    | 3.770648 | 3.570102  | 0.251038  | C                                                    | -3.915737 | 2.910014  | 0.52141   |
| C                                                    | 1.458436 | 2.870934  | 2.284184  | C                                                    | -1.145031 | 3.393921  | -0.861884 |
| H                                                    | 1.244914 | 5.698991  | 0.754569  | H                                                    | -1.518661 | 4.692286  | 2.059075  |

|    |           |           |           |    |           |           |           |
|----|-----------|-----------|-----------|----|-----------|-----------|-----------|
| C  | 1.209841  | 5.479373  | -1.370797 | C  | -2.00508  | 3.246678  | 3.557613  |
| C  | -0.597561 | 4.758515  | 0.219161  | C  | 0.189608  | 3.442039  | 2.356834  |
| H  | 4.192257  | 2.697361  | 0.766335  | H  | -4.12092  | 2.467575  | -0.464275 |
| C  | 4.293129  | 4.837838  | 0.935979  | C  | -4.357791 | 4.376147  | 0.473815  |
| C  | 4.246267  | 3.495771  | -1.201463 | C  | -4.753895 | 2.140794  | 1.545656  |
| H  | 0.476757  | 2.379879  | 2.20215   | H  | -0.190162 | 2.846619  | -0.886715 |
| C  | 1.305107  | 4.05716   | 3.242378  | C  | -0.823351 | 4.891513  | -0.823575 |
| C  | 2.439842  | 1.848538  | 2.864665  | C  | -1.893918 | 3.052073  | -2.154415 |
| H  | 0.293023  | -2.892893 | 4.200752  | H  | 0.46388   | -2.026783 | 3.728611  |
| C  | 0.932348  | -4.292194 | 2.698176  | C  | -1.55475  | -2.395815 | 4.37701   |
| H  | 1.844085  | -5.524597 | 1.191084  | H  | -3.62872  | -2.842006 | 4.724101  |
| H  | 2.256098  | 5.770032  | -1.489743 | H  | -3.06256  | 3.520208  | 3.573621  |
| H  | 0.979681  | 4.742733  | -2.149581 | H  | -1.935355 | 2.171302  | 3.758198  |
| H  | 0.600221  | 6.36579   | -1.580449 | H  | -1.525359 | 3.760729  | 4.398793  |
| H  | -1.119992 | 5.713216  | 0.091922  | H  | 0.595045  | 4.075631  | 3.154144  |
| H  | -1.019712 | 4.073537  | -0.526246 | H  | 0.446422  | 2.407702  | 2.612398  |
| H  | -0.861037 | 4.370248  | 1.207303  | H  | 0.716431  | 3.69658   | 1.432016  |
| H  | 4.045107  | 4.872071  | 2.000949  | H  | -3.862728 | 4.9334    | -0.325914 |
| H  | 5.384511  | 4.896229  | 0.855699  | H  | -5.437996 | 4.453235  | 0.303241  |
| H  | 3.88887   | 5.745057  | 0.47439   | H  | -4.143625 | 4.891525  | 1.416445  |
| H  | 5.339614  | 3.572801  | -1.243065 | H  | -5.812808 | 2.151926  | 1.260428  |
| H  | 3.96689   | 2.547789  | -1.667649 | H  | -4.450161 | 1.093628  | 1.645957  |
| H  | 3.849259  | 4.309372  | -1.81536  | H  | -4.688153 | 2.586314  | 2.541886  |
| H  | 0.994019  | 3.708033  | 4.233666  | H  | -0.255799 | 5.18221   | -1.715098 |
| H  | 2.250649  | 4.591895  | 3.377091  | H  | -1.731874 | 5.502134  | -0.811951 |
| H  | 0.562449  | 4.784546  | 2.904806  | H  | -0.228725 | 5.176706  | 0.048335  |
| H  | 2.589963  | 0.990957  | 2.205164  | H  | -2.104557 | 1.983742  | -2.246683 |
| H  | 3.421112  | 2.303715  | 3.036903  | H  | -2.847135 | 3.588366  | -2.2158   |
| H  | 2.080487  | 1.481244  | 3.833603  | H  | -1.302397 | 3.34742   | -3.028735 |
| H  | 0.045452  | -4.910882 | 2.782668  | H  | -1.353119 | -2.147334 | 5.413246  |
| C  | 7.829199  | -2.070484 | -4.486036 | C  | -9.05133  | -0.754201 | -3.026946 |
| H  | 8.680767  | -1.391471 | -4.403553 | H  | -9.198864 | -1.624085 | -3.674091 |
| H  | 7.371933  | -1.904125 | -5.467398 | H  | -9.052264 | 0.130814  | -3.669833 |
| H  | 8.204871  | -3.095427 | -4.467713 | H  | -9.905158 | -0.685332 | -2.35181  |
| Au | -1.487551 | -0.348107 | -0.099267 | Au | 1.390244  | -0.295931 | -0.738351 |
| P  | -3.782585 | -0.415423 | -0.415839 | P  | 3.707739  | -0.182178 | -0.399471 |
| C  | -4.447826 | 1.18612   | -0.970632 | C  | 4.661811  | -0.991447 | -1.724647 |
| C  | -5.593662 | 1.741606  | -0.402144 | C  | 5.827454  | -1.71244  | -1.461718 |
| H  | -6.104076 | 1.231095  | 0.407526  | H  | 6.174551  | -1.833566 | -0.440852 |
| C  | -6.079187 | 2.956862  | -0.872655 | C  | 6.540584  | -2.283495 | -2.509139 |
| H  | -6.968986 | 3.387609  | -0.426647 | H  | 7.444366  | -2.845681 | -2.300241 |
| C  | -5.429069 | 3.615902  | -1.90784  | C  | 6.097916  | -2.135881 | -3.818112 |
| H  | -5.811194 | 4.563481  | -2.271792 | H  | 6.656946  | -2.583283 | -4.632948 |
| C  | -4.285178 | 3.063621  | -2.476493 | H  | 4.585069  | -1.30885  | -5.104052 |



|                                                      |           |           |           |                                                      |           |           |           |
|------------------------------------------------------|-----------|-----------|-----------|------------------------------------------------------|-----------|-----------|-----------|
| H                                                    | -3.775775 | 3.577814  | -3.284246 | C                                                    | 4.935307  | -1.420323 | -4.083604 |
| C                                                    | -3.790786 | 1.855602  | -2.007098 | C                                                    | 4.214597  | -0.854065 | -3.04126  |
| H                                                    | -2.895195 | 1.427815  | -2.448921 | H                                                    | 3.300124  | -0.305438 | -3.247289 |
| C                                                    | -4.293353 | -1.632    | -1.66751  | C                                                    | 4.357439  | 1.517463  | -0.293157 |
| C                                                    | -5.348933 | -1.374088 | -2.543388 | C                                                    | 5.559741  | 1.890557  | -0.894274 |
| H                                                    | -5.860711 | -0.417831 | -2.515161 | H                                                    | 6.129623  | 1.167655  | -1.468289 |
| C                                                    | -5.737717 | -2.342642 | -3.461101 | H                                                    | 6.956645  | 3.481609  | -1.238336 |
| H                                                    | -6.555585 | -2.138234 | -4.143376 | C                                                    | 6.023793  | 3.194692  | -0.765153 |
| C                                                    | -5.079994 | -3.56575  | -3.506827 | C                                                    | 5.296388  | 4.126975  | -0.035877 |
| H                                                    | -5.384912 | -4.317993 | -4.226266 | H                                                    | 5.66165   | 5.143665  | 0.061654  |
| C                                                    | -4.025731 | -3.823882 | -2.637024 | H                                                    | 3.522496  | 4.486155  | 1.127724  |
| H                                                    | -3.506795 | -4.775308 | -2.67734  | C                                                    | 4.095855  | 3.758977  | 0.562696  |
| C                                                    | -3.628157 | -2.859285 | -1.722271 | C                                                    | 3.622853  | 2.461261  | 0.429413  |
| H                                                    | -2.796737 | -3.056654 | -1.05184  | H                                                    | 2.678436  | 2.178998  | 0.885107  |
| C                                                    | -4.678237 | -0.840434 | 1.109606  | C                                                    | 4.239536  | -1.000956 | 1.143452  |
| C                                                    | -4.240425 | -0.291826 | 2.31804   | C                                                    | 3.700157  | -2.255009 | 1.444172  |
| H                                                    | -3.360645 | 0.344918  | 2.337969  | H                                                    | 2.976885  | -2.705764 | 0.770483  |
| C                                                    | -4.927628 | -0.562651 | 3.492661  | C                                                    | 4.091434  | -2.925986 | 2.594011  |
| H                                                    | -4.586646 | -0.132929 | 4.428253  | H                                                    | 3.675567  | -3.902707 | 2.817835  |
| C                                                    | -6.045318 | -1.390597 | 3.470112  | C                                                    | 5.013866  | -2.34496  | 3.459116  |
| H                                                    | -6.577615 | -1.606848 | 4.390099  | H                                                    | 5.316587  | -2.867669 | 4.360107  |
| C                                                    | -6.476442 | -1.946359 | 2.271948  | H                                                    | 6.263635  | -0.639557 | 3.84218   |
| H                                                    | -7.343925 | -2.597017 | 2.254417  | C                                                    | 5.545736  | -1.095308 | 3.168815  |
| C                                                    | -5.797754 | -1.673022 | 1.090163  | C                                                    | 5.16346   | -0.422444 | 2.012996  |
| H                                                    | -6.135092 | -2.112771 | 0.157578  | H                                                    | 5.581748  | 0.553632  | 1.791211  |
| <b>TS5</b>                                           |           |           |           | <b>10</b>                                            |           |           |           |
| Thermal correction to Gibbs Free Energy=<br>0.772853 |           |           |           | Thermal correction to Gibbs Free Energy=<br>0.779682 |           |           |           |
| E(RBMK) = -3024.51710733                             |           |           |           | E(RBMK) = -3024.58587311                             |           |           |           |
| Frequency -185.5765                                  |           |           |           |                                                      |           |           |           |
| C                                                    | -0.838945 | -0.71045  | -0.816049 | C                                                    | -1.234274 | -1.064909 | -0.011451 |
| C                                                    | -2.073171 | -2.773215 | 1.258708  | C                                                    | -1.626531 | -1.863489 | 1.285584  |
| C                                                    | -1.80601  | 0.079869  | -0.253188 | C                                                    | -1.846932 | 0.246481  | -0.441353 |
| H                                                    | -1.24699  | -1.438559 | -1.519039 | H                                                    | -1.281129 | -1.73385  | -0.880478 |
| C                                                    | -3.152972 | -2.5959   | 0.450079  | C                                                    | -2.960944 | -1.997608 | 0.697036  |
| C                                                    | -1.848438 | -2.023628 | 2.512449  | C                                                    | -1.520419 | -1.221705 | 2.65419   |
| C                                                    | -1.131483 | -3.899823 | 0.96889   | C                                                    | -0.899741 | -3.213216 | 1.294656  |
| O                                                    | -3.067288 | -0.106944 | -0.669326 | O                                                    | -2.194203 | 0.348431  | -1.608885 |
| C                                                    | -1.600606 | 1.141445  | 0.766254  | C                                                    | -2.008817 | 1.379807  | 0.512168  |
| S                                                    | -4.114074 | -1.17978  | 0.536816  | S                                                    | -4.340455 | -1.101252 | 1.046708  |
| H                                                    | -3.330877 | -3.231976 | -0.40978  | H                                                    | -3.086099 | -2.750129 | -0.077724 |
| C                                                    | -0.585855 | -1.505684 | 2.819559  | C                                                    | -0.448505 | -0.404643 | 3.008099  |
| C                                                    | -2.878182 | -1.892564 | 3.450737  | C                                                    | -2.434351 | -1.582853 | 3.646005  |
| H                                                    | -1.181445 | -4.63438  | 1.779753  | H                                                    | -1.333638 | -3.872618 | 2.050381  |

|    |           |           |           |    |           |           |           |
|----|-----------|-----------|-----------|----|-----------|-----------|-----------|
| H  | -1.355725 | -4.392202 | 0.022021  | H  | -0.956221 | -3.704588 | 0.318725  |
| H  | -0.102695 | -3.532617 | 0.935349  | H  | 0.15246   | -3.049474 | 1.541601  |
| H  | -0.6084   | 1.030424  | 1.210424  | H  | -1.573537 | 1.170404  | 1.489121  |
| H  | -2.33497  | 1.01918   | 1.575595  | H  | -3.088726 | 1.516824  | 0.665762  |
| Si | -1.74904  | 2.953888  | 0.140339  | Si | -1.447859 | 3.114394  | -0.117767 |
| C  | -5.426945 | -1.45596  | -0.598816 | C  | -5.436891 | -1.564869 | -0.282252 |
| C  | -0.367756 | -0.848632 | 4.020354  | C  | -0.308528 | 0.063197  | 4.308371  |
| H  | 0.214938  | -1.578183 | 2.090202  | H  | 0.28602   | -0.126687 | 2.25597   |
| C  | -2.653319 | -1.243471 | 4.657698  | C  | -2.30144  | -1.109631 | 4.945607  |
| H  | -3.847123 | -2.338104 | 3.251311  | H  | -3.252542 | -2.25721  | 3.41424   |
| C  | -5.189307 | -1.827896 | -1.921681 | C  | -5.091685 | -1.33731  | -1.612837 |
| C  | -6.720026 | -1.238084 | -0.13197  | C  | -6.675359 | -2.10271  | 0.056277  |
| H  | -4.175484 | -1.934446 | -2.288427 | H  | -4.140669 | -0.880042 | -1.870261 |
| C  | -6.26951  | -2.013778 | -2.764239 | C  | -5.995115 | -1.689546 | -2.605297 |
| C  | -7.788071 | -1.433523 | -0.995433 | C  | -7.56612  | -2.433485 | -0.953822 |
| H  | -6.892511 | -0.927869 | 0.893069  | H  | -6.938837 | -2.27282  | 1.094743  |
| H  | -6.092837 | -2.299351 | -3.79647  | H  | -5.727114 | -1.519602 | -3.643383 |
| C  | -7.583926 | -1.825713 | -2.318277 | C  | -7.24291  | -2.235923 | -2.297889 |
| H  | -8.798346 | -1.274427 | -0.633654 | H  | -8.528719 | -2.860835 | -0.691622 |
| C  | -1.049877 | 4.053698  | 1.534306  | C  | -1.507257 | 4.230098  | 1.4274    |
| C  | -3.563119 | 3.349611  | -0.288283 | C  | -2.626056 | 3.704636  | -1.492257 |
| C  | -0.647276 | 3.124501  | -1.41395  | C  | 0.354225  | 3.029491  | -0.753268 |
| H  | -1.025218 | 5.067608  | 1.109429  | H  | -1.163019 | 5.213357  | 1.075472  |
| C  | -1.915983 | 4.102476  | 2.795288  | C  | -2.91285  | 4.413174  | 2.005085  |
| C  | 0.38791   | 3.66912   | 1.89904   | C  | -0.542872 | 3.763841  | 2.522693  |
| H  | -3.740876 | 2.800121  | -1.223376 | H  | -2.257667 | 3.203965  | -2.397354 |
| C  | -3.763333 | 4.840835  | -0.579163 | C  | -2.523152 | 5.21783   | -1.715603 |
| C  | -4.598592 | 2.850695  | 0.721828  | C  | -4.08387  | 3.272906  | -1.317754 |
| H  | 0.190129  | 2.43369   | -1.226953 | H  | 0.861372  | 2.328852  | -0.070739 |
| C  | -0.061201 | 4.523369  | -1.627813 | C  | 1.099131  | 4.36613   | -0.672344 |
| C  | -1.344778 | 2.647378  | -2.692032 | C  | 0.470321  | 2.463128  | -2.171887 |
| H  | 0.612603  | -0.43585  | 4.23403   | H  | 0.530596  | 0.702368  | 4.561643  |
| C  | -1.40052  | -0.71604  | 4.943566  | C  | -1.239618 | -0.280592 | 5.280809  |
| H  | -3.457365 | -1.161182 | 5.380777  | H  | -3.026665 | -1.398598 | 5.698437  |
| H  | -2.905918 | 4.52281   | 2.602213  | H  | -3.606077 | 4.850768  | 1.282405  |
| H  | -2.055264 | 3.106778  | 3.23196   | H  | -3.339071 | 3.461226  | 2.342036  |
| H  | -1.443431 | 4.725757  | 3.563529  | H  | -2.889196 | 5.077159  | 2.876959  |
| H  | 0.821105  | 4.399923  | 2.591423  | H  | -0.500643 | 4.495139  | 3.338163  |
| H  | 0.424602  | 2.695471  | 2.399925  | H  | -0.870337 | 2.81569   | 2.963356  |
| H  | 1.047375  | 3.615221  | 1.027167  | H  | 0.47847   | 3.623511  | 2.154291  |
| H  | -3.101143 | 5.202853  | -1.371094 | H  | -1.499228 | 5.542831  | -1.922944 |
| H  | -4.792198 | 5.039947  | -0.900382 | H  | -3.139275 | 5.524027  | -2.568508 |
| H  | -3.57915  | 5.454088  | 0.309538  | H  | -2.875902 | 5.781408  | -0.845454 |
| H  | -5.61338  | 3.050405  | 0.357791  | H  | -4.691988 | 3.646028  | -2.149943 |

|    |           |           |           |    |           |           |           |
|----|-----------|-----------|-----------|----|-----------|-----------|-----------|
| H  | -4.517457 | 1.77316   | 0.888754  | H  | -4.177447 | 2.183755  | -1.311173 |
| H  | -4.503367 | 3.344474  | 1.693002  | H  | -4.529842 | 3.66331   | -0.397179 |
| H  | 0.608844  | 4.528778  | -2.496002 | H  | 2.146106  | 4.236843  | -0.969991 |
| H  | -0.843085 | 5.26303   | -1.827897 | H  | 0.662887  | 5.108745  | -1.348235 |
| H  | 0.509857  | 4.880841  | -0.766352 | H  | 1.095895  | 4.795439  | 0.332773  |
| H  | -1.752267 | 1.637598  | -2.596505 | H  | -0.039745 | 1.503074  | -2.291101 |
| H  | -2.169428 | 3.314297  | -2.965086 | H  | 0.035009  | 3.150449  | -2.904797 |
| H  | -0.64297  | 2.641555  | -3.534149 | H  | 1.524771  | 2.332937  | -2.445238 |
| H  | -1.226668 | -0.208312 | 5.886016  | H  | -1.133738 | 0.089583  | 6.294519  |
| C  | -8.735492 | -2.022117 | -3.255357 | C  | -8.224323 | -2.568815 | -3.380651 |
| H  | -9.692761 | -1.944809 | -2.738216 | H  | -8.880582 | -3.390455 | -3.08669  |
| H  | -8.684893 | -3.001999 | -3.738158 | H  | -7.717925 | -2.846367 | -4.307305 |
| H  | -8.718597 | -1.26886  | -4.049382 | H  | -8.859147 | -1.70344  | -3.599615 |
| Au | 1.174941  | -0.54273  | -0.634546 | Au | 0.91861   | -0.775929 | -0.14233  |
| P  | 3.516291  | -0.418773 | -0.425114 | P  | 3.215738  | -0.601424 | -0.44162  |
| C  | 4.372456  | -1.852363 | -1.153885 | C  | 3.712652  | -0.966659 | -2.152076 |
| C  | 5.511768  | -2.408384 | -0.569957 | C  | 4.936408  | -1.579937 | -2.429202 |
| H  | 5.893692  | -2.012195 | 0.365216  | H  | 5.592053  | -1.882455 | -1.619343 |
| C  | 6.153722  | -3.477321 | -1.184089 | C  | 5.309218  | -1.813045 | -3.74682  |
| H  | 7.037366  | -3.908319 | -0.725984 | H  | 6.258246  | -2.29294  | -3.959464 |
| C  | 5.666365  | -3.991851 | -2.379446 | C  | 4.468171  | -1.437161 | -4.787949 |
| H  | 6.170104  | -4.826198 | -2.855551 | H  | 4.762161  | -1.623497 | -5.815248 |
| C  | 4.530484  | -3.441195 | -2.963242 | C  | 3.247292  | -0.830655 | -4.51449  |
| H  | 4.146475  | -3.844108 | -3.894134 | H  | 2.586631  | -0.543706 | -5.325207 |
| C  | 3.880763  | -2.378267 | -2.351392 | C  | 2.865136  | -0.599179 | -3.199995 |
| H  | 2.988225  | -1.954405 | -2.802541 | H  | 1.907116  | -0.13447  | -2.98778  |
| C  | 4.247297  | 1.049887  | -1.217146 | C  | 3.880393  | 1.04431   | -0.040039 |
| C  | 5.500659  | 1.004855  | -1.829749 | C  | 4.725861  | 1.725203  | -0.915222 |
| H  | 6.053846  | 0.072582  | -1.872612 | H  | 4.989822  | 1.28631   | -1.87132  |
| C  | 6.036149  | 2.154758  | -2.396907 | C  | 5.231625  | 2.971097  | -0.559503 |
| H  | 7.008192  | 2.114268  | -2.876305 | H  | 5.888115  | 3.497992  | -1.24331  |
| C  | 5.328631  | 3.350308  | -2.354622 | C  | 4.899912  | 3.537158  | 0.664337  |
| H  | 5.749347  | 4.244935  | -2.800935 | H  | 5.297377  | 4.508388  | 0.938351  |
| C  | 4.077802  | 3.398263  | -1.749074 | C  | 4.053227  | 2.86127   | 1.538276  |
| H  | 3.518794  | 4.327386  | -1.722512 | H  | 3.790326  | 3.303479  | 2.493125  |
| C  | 3.534611  | 2.251003  | -1.186942 | C  | 3.538794  | 1.622232  | 1.186507  |
| H  | 2.550956  | 2.28569   | -0.728251 | H  | 2.875941  | 1.098373  | 1.869375  |
| C  | 4.059329  | -0.366721 | 1.317055  | C  | 4.126883  | -1.780885 | 0.604807  |
| C  | 3.579612  | -1.349955 | 2.187969  | C  | 3.665292  | -3.098427 | 0.675865  |
| H  | 2.911386  | -2.122458 | 1.817883  | H  | 2.768598  | -3.38936  | 0.136103  |
| C  | 3.966557  | -1.351728 | 3.520185  | C  | 4.355542  | -4.037125 | 1.428361  |
| H  | 3.599684  | -2.124108 | 4.187925  | H  | 3.996358  | -5.059288 | 1.47761   |
| C  | 4.82433   | -0.364396 | 3.997153  | C  | 5.503181  | -3.665696 | 2.12206   |
| H  | 5.124539  | -0.363991 | 5.039472  | H  | 6.038932  | -4.399227 | 2.71472   |

|                                                      |           |           |           |                                                      |           |           |           |
|------------------------------------------------------|-----------|-----------|-----------|------------------------------------------------------|-----------|-----------|-----------|
| C                                                    | 5.296542  | 0.618274  | 3.137494  | C                                                    | 5.961472  | -2.356193 | 2.05813   |
| H                                                    | 5.96539   | 1.388416  | 3.506155  | H                                                    | 6.855496  | -2.065135 | 2.598711  |
| C                                                    | 4.919154  | 0.619124  | 1.798345  | C                                                    | 5.278421  | -1.411453 | 1.30009   |
| H                                                    | 5.294052  | 1.387597  | 1.130921  | H                                                    | 5.641068  | -0.390252 | 1.252943  |
| <b>TS6</b>                                           |           |           |           | <b>11</b>                                            |           |           |           |
| Thermal correction to Gibbs Free Energy=<br>0.786006 |           |           |           | Thermal correction to Gibbs Free Energy=<br>0.778791 |           |           |           |
| E(RBMK) = -3024.57999322                             |           |           |           | E(RBMK) = -3024.58141138                             |           |           |           |
| Frequency -73.9464                                   |           |           |           |                                                      |           |           |           |
| C                                                    | 2.249692  | -1.956305 | 0.722319  | O                                                    | 1.850661  | -0.426924 | -1.692631 |
| C                                                    | 1.030855  | -0.787918 | 0.393088  | C                                                    | 2.527894  | -2.017384 | 0.765642  |
| C                                                    | 0.852214  | -2.34064  | 0.634379  | C                                                    | 1.062684  | -2.109224 | 0.660857  |
| C                                                    | 1.31559   | -0.050413 | -0.889984 | C                                                    | 0.800201  | -0.582004 | 0.437791  |
| O                                                    | 1.596039  | -0.655576 | -1.909525 | C                                                    | 1.367976  | 0.152058  | -0.730201 |
| H                                                    | 1.032733  | -0.176834 | 1.300951  | H                                                    | 0.984855  | -0.031053 | 1.36836   |
| C                                                    | 0.414413  | -3.263338 | -0.476458 | C                                                    | 0.583985  | -3.085583 | -0.407732 |
| C                                                    | 0.186111  | -2.660112 | 1.967989  | C                                                    | 0.476438  | -2.483486 | 2.032522  |
| S                                                    | 3.438157  | -2.462613 | -0.456136 | S                                                    | 3.56317   | -2.430031 | -0.453776 |
| H                                                    | 2.65369   | -1.736395 | 1.707256  | H                                                    | 2.954847  | -1.600582 | 1.675799  |
| C                                                    | 4.955609  | -1.889984 | 0.277496  | C                                                    | 5.166539  | -1.98706  | 0.172396  |
| C                                                    | 5.842157  | -1.173658 | -0.52791  | C                                                    | 6.011504  | -1.29263  | -0.689529 |
| C                                                    | 5.326618  | -2.224608 | 1.582715  | C                                                    | 5.603377  | -2.373802 | 1.437511  |
| C                                                    | 1.210879  | 1.448629  | -0.842523 | C                                                    | 1.244825  | 1.650985  | -0.700415 |
| H                                                    | 0.455244  | 1.764592  | -0.109913 | H                                                    | 0.478281  | 1.963079  | 0.01802   |
| H                                                    | 0.861837  | 1.757834  | -1.834825 | H                                                    | 0.904172  | 1.954655  | -1.697303 |
| C                                                    | -0.405986 | -2.887179 | -1.539344 | C                                                    | -0.120045 | -2.702724 | -1.546146 |
| C                                                    | 0.813819  | -4.602    | -0.376665 | C                                                    | 0.850864  | -4.446526 | -0.220901 |
| H                                                    | 0.455539  | -3.673794 | 2.278205  | H                                                    | 0.747436  | -3.500196 | 2.322695  |
| H                                                    | 0.502528  | -1.966487 | 2.753548  | H                                                    | 0.821548  | -1.794619 | 2.809275  |
| H                                                    | -0.904244 | -2.612496 | 1.878391  | H                                                    | -0.613951 | -2.418372 | 1.976945  |
| C                                                    | -0.836783 | -3.828636 | -2.471419 | C                                                    | -0.563917 | -3.653222 | -2.460212 |
| H                                                    | -0.683974 | -1.845445 | -1.676957 | H                                                    | -0.298746 | -1.654651 | -1.749633 |
| H                                                    | -1.468327 | -3.512845 | -3.296523 | H                                                    | -1.104682 | -3.328885 | -3.342996 |
| C                                                    | -0.442225 | -5.157539 | -2.358528 | C                                                    | -0.299705 | -5.000459 | -2.259167 |
| H                                                    | -0.770104 | -5.889295 | -3.090628 | H                                                    | -0.638778 | -5.73902  | -2.977543 |
| C                                                    | 0.389779  | -5.541258 | -1.309681 | C                                                    | 0.41639   | -5.395224 | -1.134948 |
| H                                                    | 0.71283   | -6.573677 | -1.217619 | H                                                    | 0.635556  | -6.444099 | -0.966885 |
| H                                                    | 1.467924  | -4.911735 | 0.434205  | H                                                    | 1.407831  | -4.777998 | 0.650699  |
| H                                                    | 5.566517  | -0.928909 | -1.549554 | H                                                    | 5.671073  | -1.003357 | -1.678352 |
| C                                                    | 7.074969  | -0.776043 | -0.019282 | C                                                    | 7.287825  | -0.958056 | -0.2617   |
| H                                                    | 7.757293  | -0.21891  | -0.656076 | H                                                    | 7.941998  | -0.407672 | -0.930266 |
| C                                                    | 7.447266  | -1.071677 | 1.294569  | C                                                    | 7.742932  | -1.311954 | 1.009809  |
| C                                                    | 6.549527  | -1.798985 | 2.085172  | C                                                    | 6.879414  | -2.02237  | 1.848127  |
| C                                                    | 8.786591  | -0.659585 | 1.833545  | C                                                    | 9.135148  | -0.97651  | 1.450609  |

|    |           |           |           |    |           |           |           |
|----|-----------|-----------|-----------|----|-----------|-----------|-----------|
| H  | 6.824151  | -2.056684 | 3.10495   | H  | 7.218993  | -2.321416 | 2.834752  |
| H  | 8.726599  | -0.386845 | 2.890843  | H  | 9.182671  | -0.804446 | 2.527902  |
| H  | 9.195891  | 0.191316  | 1.283282  | H  | 9.512077  | -0.08726  | 0.94186   |
| H  | 9.507141  | -1.48149  | 1.750139  | H  | 9.817449  | -1.801726 | 1.219718  |
| H  | 4.670961  | -2.829843 | 2.202945  | H  | 4.964559  | -2.958153 | 2.091386  |
| Au | -1.25591  | -0.31544  | 0.296166  | Au | -1.341537 | -0.248523 | 0.304124  |
| P  | -3.465847 | 0.284333  | 0.270234  | P  | -3.620389 | 0.184448  | 0.212178  |
| C  | -3.680893 | 2.024871  | -0.206415 | C  | -3.984976 | 1.944686  | -0.075641 |
| C  | -4.584443 | 2.855555  | 0.463403  | C  | -5.009159 | 2.601908  | 0.606592  |
| H  | -5.154805 | 2.476963  | 1.306449  | H  | -5.594581 | 2.07417   | 1.35206   |
| C  | -4.74858  | 4.174947  | 0.047943  | C  | -5.274755 | 3.939203  | 0.334051  |
| H  | -5.448703 | 4.819147  | 0.570918  | H  | -6.069668 | 4.447967  | 0.868397  |
| C  | -4.018481 | 4.665578  | -1.030589 | C  | -4.525898 | 4.62094   | -0.616682 |
| H  | -4.148292 | 5.695331  | -1.349418 | H  | -4.73581  | 5.664345  | -0.825648 |
| C  | -3.11731  | 3.838731  | -1.700333 | C  | -3.502914 | 3.96827   | -1.297525 |
| H  | -2.545273 | 4.221434  | -2.54005  | H  | -2.914645 | 4.500311  | -2.037304 |
| C  | -2.943627 | 2.522574  | -1.288891 | C  | -3.227729 | 2.635903  | -1.025448 |
| H  | -2.236351 | 1.880456  | -1.808883 | H  | -2.422896 | 2.129891  | -1.551016 |
| C  | -4.424119 | -0.70923  | -0.909691 | C  | -4.456794 | -0.729952 | -1.11996  |
| C  | -5.494694 | -0.147948 | -1.615326 | C  | -5.498636 | -0.158554 | -1.852369 |
| H  | -5.739478 | 0.903292  | -1.49377  | H  | -5.803535 | 0.864861  | -1.660648 |
| C  | -6.24191  | -0.940696 | -2.481629 | C  | -6.140193 | -0.901146 | -2.836361 |
| H  | -7.070176 | -0.503394 | -3.030614 | H  | -6.946847 | -0.453395 | -3.406499 |
| C  | -5.925254 | -2.286783 | -2.647872 | C  | -5.748551 | -2.210015 | -3.090775 |
| H  | -6.508429 | -2.899856 | -3.328374 | H  | -6.251356 | -2.78562  | -3.86047  |
| C  | -4.857156 | -2.84635  | -1.949443 | C  | -4.70747  | -2.779805 | -2.36547  |
| H  | -4.602432 | -3.893131 | -2.084106 | H  | -4.394268 | -3.798454 | -2.567082 |
| C  | -4.104129 | -2.06134  | -1.083443 | C  | -4.057417 | -2.042287 | -1.38581  |
| H  | -3.262065 | -2.498459 | -0.552682 | H  | -3.233297 | -2.484805 | -0.833915 |
| C  | -4.234469 | 0.077732  | 1.903699  | C  | -4.477974 | -0.262941 | 1.754505  |
| C  | -3.522728 | 0.476775  | 3.042586  | C  | -3.89357  | 0.098555  | 2.971775  |
| H  | -2.515291 | 0.874555  | 2.943544  | H  | -2.936807 | 0.612752  | 2.983169  |
| C  | -4.104702 | 0.365651  | 4.299751  | C  | -4.535407 | -0.197276 | 4.16551   |
| H  | -3.551591 | 0.677319  | 5.180466  | H  | -4.080741 | 0.088492  | 5.107817  |
| C  | -5.392558 | -0.15262  | 4.428227  | C  | -5.755566 | -0.865981 | 4.152766  |
| H  | -5.843092 | -0.245611 | 5.411734  | H  | -6.253198 | -1.102566 | 5.087024  |
| C  | -6.099567 | -0.556173 | 3.299139  | C  | -6.333777 | -1.235849 | 2.945228  |
| H  | -7.100865 | -0.963567 | 3.399382  | H  | -7.282393 | -1.761426 | 2.934044  |
| C  | -5.526081 | -0.442062 | 2.035248  | C  | -5.700114 | -0.935316 | 1.744701  |
| H  | -6.079951 | -0.760184 | 1.157018  | H  | -6.154089 | -1.228251 | 0.804083  |
| Si | 2.717553  | 2.618147  | -0.498181 | Si | 2.768679  | 2.773938  | -0.357053 |
| C  | 2.056547  | 4.352744  | -0.949257 | C  | 2.143313  | 4.552453  | -0.640937 |
| C  | 0.787298  | 4.70503   | -0.163568 | C  | 0.929938  | 4.875621  | 0.237935  |
| H  | 0.902162  | 4.562478  | 0.916576  | H  | 1.098142  | 4.648524  | 1.295326  |

|                                                      |           |           |           |                                                      |           |           |           |
|------------------------------------------------------|-----------|-----------|-----------|------------------------------------------------------|-----------|-----------|-----------|
| H                                                    | 0.509094  | 5.753535  | -0.325184 | H                                                    | 0.675628  | 5.939342  | 0.169824  |
| C                                                    | 4.225886  | 2.080531  | -1.522176 | C                                                    | 4.224016  | 2.291144  | -1.484019 |
| H                                                    | 4.600042  | 1.18989   | -0.995458 | H                                                    | 4.599785  | 1.353326  | -1.048144 |
| C                                                    | 3.088054  | 2.589614  | 1.382286  | C                                                    | 3.245661  | 2.59021   | 1.488532  |
| H                                                    | 2.100065  | 2.487899  | 1.861667  | H                                                    | 2.284677  | 2.456229  | 2.008811  |
| C                                                    | 3.938418  | 1.387898  | 1.803687  | C                                                    | 4.092027  | 1.342494  | 1.747865  |
| H                                                    | 3.532903  | 0.436397  | 1.446501  | H                                                    | 3.656403  | 0.446694  | 1.294818  |
| C                                                    | 5.341137  | 3.132959  | -1.491422 | C                                                    | 5.360604  | 3.317064  | -1.417058 |
| H                                                    | 5.663169  | 3.376004  | -0.473461 | H                                                    | 5.727233  | 3.474191  | -0.398281 |
| H                                                    | 5.02939   | 4.067798  | -1.971239 | H                                                    | 5.047346  | 4.291116  | -1.807308 |
| H                                                    | 6.223932  | 2.774537  | -2.035046 | H                                                    | 6.212644  | 2.989697  | -2.024297 |
| C                                                    | 3.71465   | 3.885463  | 1.911662  | C                                                    | 3.923603  | 3.820836  | 2.098474  |
| H                                                    | 3.093888  | 4.764883  | 1.717318  | H                                                    | 3.312684  | 4.722593  | 2.009833  |
| H                                                    | 3.864382  | 3.824477  | 2.996581  | H                                                    | 4.12021   | 3.663233  | 3.165345  |
| H                                                    | 4.697555  | 4.071554  | 1.465243  | H                                                    | 4.887393  | 4.029703  | 1.623513  |
| H                                                    | 4.019621  | 1.327147  | 2.896168  | H                                                    | 4.205413  | 1.155903  | 2.822504  |
| H                                                    | 4.95808   | 1.460704  | 1.409973  | H                                                    | 5.098635  | 1.449954  | 1.331004  |
| H                                                    | -0.066809 | 4.098052  | -0.488602 | H                                                    | 0.044355  | 4.315707  | -0.083036 |
| C                                                    | 1.837827  | 4.587477  | -2.446346 | C                                                    | 1.849318  | 4.901548  | -2.101304 |
| H                                                    | 1.444367  | 5.595915  | -2.624747 | H                                                    | 1.477647  | 5.929587  | -2.182496 |
| H                                                    | 1.112948  | 3.882514  | -2.872312 | H                                                    | 1.081145  | 4.248866  | -2.53179  |
| H                                                    | 2.763031  | 4.493941  | -3.021447 | H                                                    | 2.737226  | 4.826867  | -2.733483 |
| C                                                    | 3.905554  | 1.656791  | -2.960454 | C                                                    | 3.83827   | 1.988386  | -2.935234 |
| H                                                    | 3.158289  | 0.859071  | -2.999948 | H                                                    | 3.092025  | 1.193089  | -2.996803 |
| H                                                    | 3.538151  | 2.495031  | -3.561309 | H                                                    | 3.443097  | 2.870868  | -3.446422 |
| H                                                    | 4.812932  | 1.289427  | -3.456899 | H                                                    | 4.720808  | 1.666035  | -3.501581 |
| H                                                    | 2.850834  | 5.04073   | -0.621814 | H                                                    | 2.973098  | 5.193739  | -0.309982 |
| <b>TS7</b>                                           |           |           |           | <b>12</b>                                            |           |           |           |
| Thermal correction to Gibbs Free Energy=<br>0.778574 |           |           |           | Thermal correction to Gibbs Free Energy=<br>0.781378 |           |           |           |
| E(RBMK) = -3024.57911944                             |           |           |           | E(RBMK) = -3024.61684289                             |           |           |           |
| Frequency -33.7886                                   |           |           |           |                                                      |           |           |           |
| O                                                    | 2.030379  | -0.166004 | -1.454834 | C                                                    | -0.732187 | -0.228727 | -1.19739  |
| C                                                    | 2.563584  | -1.985651 | 0.775295  | C                                                    | -1.387355 | -1.617098 | -1.37442  |
| C                                                    | 1.097415  | -1.942678 | 0.873058  | C                                                    | -1.475135 | 0.466125  | -0.219374 |
| C                                                    | 0.813975  | -0.411901 | 0.603313  | H                                                    | -0.472721 | 0.325905  | -2.101693 |
| C                                                    | 1.452763  | 0.353446  | -0.508302 | C                                                    | -2.682489 | -1.425763 | -0.539068 |
| H                                                    | 0.969064  | 0.143     | 1.535927  | C                                                    | -0.516168 | -2.738071 | -0.806657 |
| C                                                    | 0.405165  | -2.932117 | -0.065112 | C                                                    | -1.774156 | -1.8534   | -2.83237  |
| C                                                    | 0.731864  | -2.177509 | 2.35169   | S                                                    | -3.265328 | -2.849053 | 0.378717  |
| S                                                    | 3.405096  | -2.753462 | -0.415278 | H                                                    | -3.503168 | -1.089597 | -1.176703 |
| H                                                    | 3.140371  | -1.437726 | 1.519422  | O                                                    | -2.412921 | -0.264602 | 0.336867  |
| C                                                    | 5.100917  | -2.367451 | -0.046329 | C                                                    | -4.995486 | -2.428124 | 0.524324  |
| C                                                    | 5.856205  | -1.76646  | -1.04963  | C                                                    | -5.452863 | -1.709777 | 1.62645   |

|    |           |           |           |    |           |           |           |
|----|-----------|-----------|-----------|----|-----------|-----------|-----------|
| C  | 5.674773  | -2.710188 | 1.175325  | C  | -5.904553 | -2.869111 | -0.435932 |
| C  | 1.292099  | 1.845772  | -0.425606 | C  | -1.351316 | 1.840002  | 0.258334  |
| H  | 0.556896  | 2.12069   | 0.337594  | H  | -0.399985 | 2.271887  | -0.058917 |
| H  | 0.900317  | 2.178737  | -1.394057 | H  | -1.376033 | 1.832762  | 1.353884  |
| C  | 0.248064  | -2.648974 | -1.426419 | Si | -2.780913 | 3.075423  | -0.213862 |
| C  | -0.052434 | -4.164536 | 0.409338  | C  | -0.144286 | -2.709576 | 0.54524   |
| H  | 1.035198  | -3.165254 | 2.702304  | C  | -0.087808 | -3.815119 | -1.579575 |
| H  | 1.215334  | -1.432236 | 2.987788  | H  | -2.349666 | -2.776376 | -2.944231 |
| H  | -0.350869 | -2.073911 | 2.465262  | H  | -2.384884 | -1.025987 | -3.201638 |
| C  | -0.347207 | -3.570178 | -2.279661 | H  | -0.888637 | -1.921333 | -3.468761 |
| H  | 0.621418  | -1.713704 | -1.825458 | C  | -2.349576 | 4.712041  | 0.673031  |
| H  | -0.453893 | -3.327736 | -3.331608 | C  | -4.433438 | 2.39868   | 0.434796  |
| C  | -0.799549 | -4.79078  | -1.794594 | C  | -2.852313 | 3.252694  | -2.10963  |
| H  | -1.257721 | -5.511763 | -2.463479 | C  | 0.620578  | -3.724887 | 1.101629  |
| C  | -0.651896 | -5.082813 | -0.445313 | H  | -0.490191 | -1.904395 | 1.18724   |
| H  | -1.000746 | -6.030804 | -0.049832 | H  | 0.879433  | -3.68797  | 2.154259  |
| H  | 0.043485  | -4.426851 | 1.455641  | C  | 1.040324  | -4.791971 | 0.315488  |
| H  | 5.401408  | -1.503615 | -1.998719 | H  | 1.631343  | -5.590576 | 0.750502  |
| C  | 7.192168  | -1.485137 | -0.807385 | C  | 0.686445  | -4.830932 | -1.025216 |
| H  | 7.780241  | -1.00573  | -1.583379 | H  | 1.000036  | -5.662057 | -1.648122 |
| C  | 7.791556  | -1.801794 | 0.413951  | H  | -0.361875 | -3.884511 | -2.625094 |
| C  | 7.010899  | -2.414517 | 1.39723   | H  | -3.340397 | 5.149561  | 0.867915  |
| C  | 9.2452    | -1.52582  | 0.649791  | H  | -4.585188 | 1.436041  | -0.072756 |
| H  | 7.460381  | -2.677964 | 2.349347  | H  | -3.429151 | 4.173565  | -2.281825 |
| H  | 9.454485  | -1.359779 | 1.708344  | H  | -4.749478 | -1.381843 | 2.383595  |
| H  | 9.581515  | -0.651186 | 0.089501  | C  | -6.805268 | -1.421962 | 1.751769  |
| H  | 9.852071  | -2.377526 | 0.32402   | H  | -7.152929 | -0.863207 | 2.615725  |
| H  | 5.092887  | -3.213863 | 1.940004  | C  | -7.727589 | -1.847819 | 0.794697  |
| Au | -1.303774 | -0.176398 | 0.317911  | C  | -7.253429 | -2.573292 | -0.299855 |
| P  | -3.592618 | 0.147902  | 0.086267  | C  | -9.192627 | -1.569606 | 0.956005  |
| C  | -4.014083 | 1.857367  | -0.380553 | H  | -7.953372 | -2.920982 | -1.053758 |
| C  | -5.081113 | 2.538457  | 0.20572   | H  | -9.366824 | -0.679004 | 1.563453  |
| H  | -5.670426 | 2.063527  | 0.982977  | H  | -9.690484 | -2.408977 | 1.453345  |
| C  | -5.384828 | 3.832273  | -0.203149 | H  | -9.681259 | -1.427412 | -0.010571 |
| H  | -6.213365 | 4.359778  | 0.256846  | H  | -5.554735 | -3.449064 | -1.28336  |
| C  | -4.631152 | 4.446929  | -1.194886 | Au | 1.30485   | -0.18325  | -0.404468 |
| H  | -4.870893 | 5.456568  | -1.510532 | P  | 3.525034  | 0.061899  | 0.217038  |
| C  | -3.56542  | 3.770554  | -1.780239 | C  | 3.713971  | 1.204496  | 1.622956  |
| H  | -2.973816 | 4.250387  | -2.552397 | C  | 4.696538  | 2.1944    | 1.636257  |
| C  | -3.252493 | 2.482093  | -1.371998 | H  | 5.357865  | 2.317964  | 0.785278  |
| H  | -2.414629 | 1.958304  | -1.8232   | C  | 4.824262  | 3.027604  | 2.742252  |
| C  | -4.348776 | -0.917666 | -1.179594 | H  | 5.588047  | 3.797567  | 2.748317  |
| C  | -5.426179 | -0.476378 | -1.950412 | C  | 3.979309  | 2.874821  | 3.833944  |
| H  | -5.803296 | 0.534231  | -1.833095 | H  | 4.082844  | 3.526242  | 4.694968  |

|    |           |           |           |   |           |           |           |
|----|-----------|-----------|-----------|---|-----------|-----------|-----------|
| C  | -6.009504 | -1.330995 | -2.87748  | H | 2.336243  | 1.769003  | 4.674235  |
| H  | -6.843774 | -0.984178 | -3.477478 | C | 2.997523  | 1.888619  | 3.822875  |
| C  | -5.523726 | -2.623442 | -3.037715 | C | 2.859688  | 1.05899   | 2.71963   |
| H  | -5.981136 | -3.287369 | -3.763434 | H | 2.089018  | 0.293416  | 2.709626  |
| C  | -4.446234 | -3.062317 | -2.276316 | C | 4.345166  | -1.483543 | 0.710117  |
| H  | -4.057621 | -4.066398 | -2.406469 | C | 5.284027  | -1.508544 | 1.743359  |
| C  | -3.853636 | -2.212395 | -1.352465 | H | 5.50009   | -0.607088 | 2.307126  |
| H  | -2.998894 | -2.553168 | -0.775191 | H | 6.665691  | -2.711993 | 2.857946  |
| C  | -4.49411  | -0.18261  | 1.634369  | C | 5.938938  | -2.694164 | 2.053137  |
| C  | -3.977802 | 0.33314   | 2.826731  | C | 5.664176  | -3.851644 | 1.334392  |
| H  | -3.049083 | 0.896531  | 2.816551  | H | 6.17936   | -4.774746 | 1.577475  |
| C  | -4.651084 | 0.128028  | 4.022196  | H | 4.500845  | -4.734102 | -0.245406 |
| H  | -4.249473 | 0.534282  | 4.944201  | C | 4.724014  | -3.829813 | 0.309967  |
| C  | -5.834738 | -0.603387 | 4.037946  | C | 4.058508  | -2.651779 | 0.00059   |
| H  | -6.35715  | -0.76834  | 4.974097  | H | 3.310149  | -2.643974 | -0.786385 |
| C  | -6.344605 | -1.126605 | 2.856689  | C | 4.528693  | 0.754765  | -1.135126 |
| H  | -7.264651 | -1.700805 | 2.867948  | C | 3.988477  | 1.780825  | -1.915183 |
| C  | -5.679392 | -0.91738  | 1.653661  | H | 2.975326  | 2.12594   | -1.729991 |
| H  | -6.080527 | -1.32937  | 0.733895  | C | 4.742887  | 2.355986  | -2.927463 |
| Si | 2.841963  | 2.943362  | -0.13576  | H | 4.320073  | 3.152791  | -3.52962  |
| C  | 2.171056  | 4.719559  | 0.032169  | C | 6.034821  | 1.903296  | -3.175336 |
| C  | 1.16199   | 4.850576  | 1.178005  | H | 6.621077  | 2.348275  | -3.972012 |
| H  | 1.536919  | 4.448254  | 2.124205  | H | 7.576195  | 0.518648  | -2.604835 |
| H  | 0.905863  | 5.902097  | 1.349375  | C | 6.571532  | 0.876827  | -2.40857  |
| C  | 4.068355  | 2.741084  | -1.578046 | C | 5.823824  | 0.30136   | -1.38765  |
| H  | 4.577928  | 1.788338  | -1.374878 | H | 6.246061  | -0.502903 | -0.794799 |
| C  | 3.651927  | 2.427758  | 1.520668  | C | -5.592564 | 3.32436   | 0.044836  |
| H  | 2.806125  | 2.150682  | 2.16889   | H | -5.643357 | 3.513887  | -1.03153  |
| C  | 4.546831  | 1.195687  | 1.363488  | H | -6.55023  | 2.884884  | 0.343942  |
| H  | 4.071252  | 0.400441  | 0.780777  | H | -5.516668 | 4.294953  | 0.546576  |
| C  | 5.131378  | 3.845414  | -1.577073 | C | -4.453837 | 2.128829  | 1.940892  |
| H  | 5.677067  | 3.903652  | -0.630252 | H | -5.409812 | 1.679607  | 2.231652  |
| H  | 4.690472  | 4.830564  | -1.761509 | H | -3.664853 | 1.438     | 2.251862  |
| H  | 5.869397  | 3.671767  | -2.368559 | H | -4.347568 | 3.053697  | 2.516909  |
| C  | 4.423414  | 3.545149  | 2.229068  | C | -1.666847 | 4.509402  | 2.029989  |
| H  | 3.802149  | 4.420694  | 2.432835  | H | -2.207748 | 3.818603  | 2.682575  |
| H  | 4.818562  | 3.194015  | 3.189541  | H | -0.646613 | 4.127987  | 1.909897  |
| H  | 5.279514  | 3.881539  | 1.635515  | H | -1.587614 | 5.463392  | 2.562312  |
| H  | 4.832919  | 0.783859  | 2.339174  | C | -1.566019 | 5.72929   | -0.159485 |
| H  | 5.474391  | 1.44891   | 0.839985  | H | -1.469118 | 6.672338  | 0.389588  |
| H  | 0.22607   | 4.330849  | 0.94465   | H | -0.549619 | 5.380393  | -0.372356 |
| C  | 1.581344  | 5.29313   | -1.258444 | H | -2.051017 | 5.956408  | -1.11254  |
| H  | 1.219536  | 6.314834  | -1.095059 | C | -1.481577 | 3.436053  | -2.768833 |
| H  | 0.726176  | 4.704067  | -1.609417 | H | -0.855671 | 2.545116  | -2.645607 |



|                                                      |           |           |           |                                                      |           |           |           |
|------------------------------------------------------|-----------|-----------|-----------|------------------------------------------------------|-----------|-----------|-----------|
| H                                                    | 2.312295  | 5.332782  | -2.069724 | H                                                    | -1.593126 | 3.598606  | -3.846524 |
| C                                                    | 3.411166  | 2.603008  | -2.954371 | H                                                    | -0.927129 | 4.286006  | -2.366252 |
| H                                                    | 2.751493  | 1.732938  | -2.991958 | C                                                    | -3.609519 | 2.103126  | -2.781959 |
| H                                                    | 2.831054  | 3.489886  | -3.227536 | H                                                    | -3.669547 | 2.262779  | -3.864298 |
| H                                                    | 4.17711   | 2.474084  | -3.728388 | H                                                    | -3.097269 | 1.145641  | -2.631143 |
| H                                                    | 3.051058  | 5.325828  | 0.292122  | H                                                    | -4.630779 | 1.993028  | -2.409565 |
| <b>13</b>                                            |           |           |           | <b>TS8</b>                                           |           |           |           |
| Thermal correction to Gibbs Free Energy=<br>0.773277 |           |           |           | Thermal correction to Gibbs Free Energy=<br>0.781958 |           |           |           |
| E(RBMK) = -3024.52470191                             |           |           |           | E(RBMK) = -3024.50779694                             |           |           |           |
|                                                      |           |           |           | Frequency -92.9820                                   |           |           |           |
| C                                                    | -0.462021 | 0.725814  | -0.969544 | O                                                    | 2.820619  | -0.337977 | -0.71272  |
| C                                                    | -2.322783 | 3.506592  | -0.093319 | S                                                    | 4.215155  | -1.488817 | 0.277434  |
| C                                                    | -1.522039 | 0.283798  | -0.291315 | C                                                    | 1.646597  | -0.239554 | -0.123775 |
| C                                                    | -3.187274 | 2.69536   | 0.641778  | C                                                    | 0.584125  | -0.813931 | -0.80252  |
| C                                                    | -1.733253 | 4.587296  | 0.535801  | C                                                    | 1.564783  | 0.547541  | 1.138057  |
| C                                                    | -1.616356 | -0.482151 | 0.981326  | H                                                    | 0.919081  | -1.422365 | -1.645926 |
| C                                                    | -3.437029 | 2.936347  | 1.989184  | C                                                    | 4.897439  | -2.297765 | -1.093833 |
| C                                                    | -1.984429 | 4.871973  | 1.883891  | C                                                    | 5.995773  | -1.849541 | -1.750333 |
| C                                                    | -4.867124 | 2.028576  | -1.39028  | C                                                    | 6.637346  | -0.552723 | -1.473321 |
| C                                                    | -2.841342 | 4.032327  | 2.596054  | C                                                    | 6.596135  | -2.712912 | -2.818766 |
| C                                                    | -1.332215 | 6.049739  | 2.539834  | C                                                    | 8.032424  | -0.461627 | -1.346073 |
| C                                                    | -2.656546 | -3.014373 | 2.381744  | C                                                    | 5.868908  | 0.617482  | -1.370537 |
| C                                                    | -2.537265 | -2.952016 | -0.720091 | C                                                    | 8.636247  | 0.760916  | -1.085881 |
| C                                                    | 0.155023  | -3.043226 | 0.885851  | C                                                    | 6.482267  | 1.842617  | -1.126969 |
| C                                                    | -6.070253 | 1.574925  | -1.792412 | C                                                    | 7.863529  | 1.916709  | -0.977427 |
| C                                                    | -4.082232 | -2.453397 | 2.366358  | C                                                    | 3.135234  | -2.677096 | 0.965246  |
| C                                                    | -2.005164 | -2.753919 | 3.742001  | C                                                    | 2.242055  | -3.429502 | 0.191706  |
| C                                                    | -3.187548 | -4.337114 | -0.641789 | C                                                    | 1.392562  | -4.333008 | 0.820235  |
| C                                                    | -1.642307 | -2.85665  | -1.960362 | C                                                    | 3.123081  | -2.786992 | 2.363039  |
| C                                                    | 0.221349  | -4.571276 | 0.980241  | C                                                    | 1.390166  | -4.482346 | 2.209408  |
| C                                                    | 1.07797   | -2.403652 | 1.925565  | C                                                    | 2.262647  | -3.687174 | 2.968029  |
| C                                                    | -6.668921 | 0.318317  | -1.307154 | C                                                    | 0.494211  | -5.481666 | 2.878026  |
| C                                                    | -6.838136 | 2.35447   | -2.811232 | H                                                    | 2.221673  | -3.325184 | -0.887868 |
| C                                                    | -7.980917 | 0.292461  | -0.821839 | H                                                    | 0.711011  | -4.92612  | 0.216959  |
| C                                                    | -5.942821 | -0.874896 | -1.378773 | H                                                    | 0.686784  | 0.241808  | 1.713164  |
| C                                                    | -8.539503 | -0.898639 | -0.385211 | H                                                    | 2.452164  | 0.318974  | 1.74403   |
| C                                                    | -6.516623 | -2.069365 | -0.961412 | Si                                                   | 1.552452  | 2.478507  | 0.981368  |
| C                                                    | -7.810764 | -2.081992 | -0.457925 | C                                                    | 2.349021  | 2.980871  | -0.685851 |
| H                                                    | -2.7293   | -4.103761 | 2.252933  | C                                                    | 2.99685   | 4.370776  | -0.681899 |
| H                                                    | -0.718025 | 1.260352  | -1.885923 | C                                                    | 1.37833   | 2.856095  | -1.866185 |
| H                                                    | -2.103742 | 3.287194  | -1.131638 | C                                                    | -0.257253 | 3.086091  | 1.060969  |
| O                                                    | -2.781521 | 0.51121   | -0.939856 | C                                                    | -0.338815 | 4.613488  | 1.17022   |
| S                                                    | -3.990577 | 1.294285  | -0.072537 | C                                                    | -1.135365 | 2.425932  | 2.12785   |

|    |           |           |           |    |           |           |           |
|----|-----------|-----------|-----------|----|-----------|-----------|-----------|
| H  | -1.055688 | 5.222198  | -0.026106 | C  | 2.629587  | 3.142811  | 2.413125  |
| H  | -0.771968 | -0.201216 | 1.615903  | C  | 4.063402  | 2.603808  | 2.346563  |
| H  | -2.520448 | -0.193601 | 1.535267  | C  | 2.041258  | 2.90203   | 3.806595  |
| Si | -1.642282 | -2.409432 | 0.88081   | H  | 2.676445  | 4.230836  | 2.254625  |
| H  | -4.095507 | 2.285031  | 2.554629  | H  | 3.801381  | -2.187634 | 2.963622  |
| H  | -4.408059 | 2.921879  | -1.797003 | H  | 4.426108  | -3.237863 | -1.359461 |
| H  | -4.590233 | -2.598066 | 1.40824   | H  | 4.530327  | 2.742734  | 1.365839  |
| H  | -3.343031 | -2.214092 | -0.8397   | H  | 3.147449  | 2.239607  | -0.838878 |
| H  | 0.541864  | -2.752176 | -0.102103 | H  | -0.68     | 2.80213   | 0.084708  |
| H  | -7.007839 | 1.736308  | -3.698034 | H  | 6.6287    | -2.170086 | -3.769272 |
| H  | -6.326862 | 3.272294  | -3.103041 | H  | 6.040688  | -3.642442 | -2.957718 |
| H  | -7.826481 | 2.614427  | -2.419153 | H  | 7.631449  | -2.97046  | -2.569655 |
| H  | -8.557859 | 1.20925   | -0.761079 | H  | 8.645848  | -1.354372 | -1.42135  |
| H  | -4.945918 | -0.871787 | -1.808699 | H  | 4.795613  | 0.572408  | -1.532305 |
| H  | -9.55045  | -0.906159 | 0.007002  | H  | 9.714484  | 0.81443   | -0.970845 |
| H  | -5.952393 | -2.992121 | -1.04258  | H  | 5.877216  | 2.743015  | -1.071743 |
| H  | -8.257777 | -3.01449  | -0.131248 | H  | 8.341214  | 2.873255  | -0.788304 |
| H  | -3.042711 | 4.234981  | 3.642566  | H  | 2.271012  | -3.785445 | 4.050035  |
| H  | -4.089617 | -1.378222 | 2.580975  | H  | 4.099395  | 1.530919  | 2.573062  |
| H  | -4.695541 | -2.930285 | 3.139368  | H  | 4.700476  | 3.101088  | 3.087922  |
| H  | -2.663593 | -3.083598 | 4.554265  | H  | 2.724465  | 3.264413  | 4.584808  |
| H  | -1.807506 | -1.687646 | 3.902891  | H  | 1.87461   | 1.83483   | 3.999702  |
| H  | -1.058616 | -3.286853 | 3.856579  | H  | 1.086852  | 3.416897  | 3.948276  |
| H  | -3.729807 | -4.558923 | -1.569288 | H  | 3.484102  | 4.570481  | -1.644837 |
| H  | -3.89624  | -4.427538 | 0.186286  | H  | 3.754205  | 4.483591  | 0.100088  |
| H  | -2.443066 | -5.129555 | -0.518366 | H  | 2.257292  | 5.165264  | -0.533539 |
| H  | -1.182201 | -1.871248 | -2.069252 | H  | 0.90703   | 1.869187  | -1.920938 |
| H  | -2.219077 | -3.060026 | -2.870446 | H  | 1.898464  | 3.026816  | -2.816879 |
| H  | -0.836421 | -3.597372 | -1.921311 | H  | 0.578413  | 3.60304   | -1.800293 |
| H  | -0.336553 | -5.064419 | 0.179251  | H  | 0.201721  | 5.119994  | 0.364112  |
| H  | -0.178847 | -4.934772 | 1.933067  | H  | 0.074587  | 4.973149  | 2.119657  |
| H  | 1.260134  | -4.915078 | 0.91474   | H  | -1.382646 | 4.948218  | 1.124624  |
| H  | 0.770638  | -2.630428 | 2.950255  | H  | -0.786655 | 2.638111  | 3.143641  |
| H  | 1.120328  | -1.314848 | 1.819882  | H  | -1.175822 | 1.337179  | 2.010534  |
| H  | 2.100904  | -2.777221 | 1.802188  | H  | -2.165389 | 2.795869  | 2.053209  |
| H  | -1.646654 | 6.157338  | 3.578696  | H  | 0.101643  | -5.095926 | 3.822872  |
| H  | -1.578734 | 6.97528   | 2.011348  | H  | 1.048157  | -6.399352 | 3.108183  |
| H  | -0.242894 | 5.947847  | 2.522301  | H  | -0.349148 | -5.756283 | 2.240255  |
| Au | 1.518178  | 0.434274  | -0.596373 | Au | -1.393579 | -0.47897  | -0.583186 |
| P  | 3.822792  | 0.129674  | -0.29457  | P  | -3.715147 | -0.137071 | -0.409136 |
| C  | 4.513353  | 1.001581  | 1.151084  | C  | -4.474634 | -1.021776 | 0.992477  |
| C  | 5.770986  | 1.605112  | 1.117902  | C  | -5.753857 | -1.580582 | 0.906038  |
| H  | 6.357427  | 1.591254  | 0.205288  | H  | -6.31248  | -1.52164  | -0.02356  |
| C  | 6.27016   | 2.23284   | 2.253213  | C  | -6.309497 | -2.21995  | 2.011089  |

|                                                                                  |          |           |           |                                                                                                         |           |           |           |
|----------------------------------------------------------------------------------|----------|-----------|-----------|---------------------------------------------------------------------------------------------------------|-----------|-----------|-----------|
| H                                                                                | 7.246965 | 2.703293  | 2.220904  | H                                                                                                       | -7.301777 | -2.65477  | 1.9378    |
| C                                                                                | 5.522084 | 2.258478  | 3.423771  | C                                                                                                       | -5.596466 | -2.302648 | 3.204184  |
| H                                                                                | 5.915508 | 2.748292  | 4.308101  | H                                                                                                       | -6.033526 | -2.802016 | 4.063778  |
| H                                                                                | 3.678366 | 1.684433  | 4.371128  | C                                                                                                       | -4.320716 | -1.749648 | 3.294108  |
| C                                                                                | 4.266423 | 1.661388  | 3.459896  | H                                                                                                       | -3.761542 | -1.816316 | 4.222634  |
| C                                                                                | 3.759264 | 1.040933  | 2.326659  | C                                                                                                       | -3.757421 | -1.116349 | 2.191597  |
| H                                                                                | 2.773812 | 0.585493  | 2.351049  | H                                                                                                       | -2.758095 | -0.693123 | 2.258891  |
| C                                                                                | 4.278956 | -1.622659 | -0.070823 | C                                                                                                       | -4.146464 | 1.620875  | -0.186095 |
| C                                                                                | 5.165989 | -2.041659 | 0.920198  | C                                                                                                       | -5.10116  | 2.041389  | 0.7443    |
| H                                                                                | 5.607212 | -1.318251 | 1.597558  | H                                                                                                       | -5.608356 | 1.314333  | 1.37165   |
| H                                                                                | 6.168759 | -3.712078 | 1.819143  | C                                                                                                       | -5.398328 | 3.39659   | 0.871068  |
| C                                                                                | 5.480312 | -3.390762 | 1.044962  | H                                                                                                       | -6.138895 | 3.718657  | 1.596976  |
| C                                                                                | 4.9173   | -4.322389 | 0.182082  | C                                                                                                       | -4.750199 | 4.333626  | 0.071166  |
| H                                                                                | 5.165971 | -5.373592 | 0.281294  | H                                                                                                       | -4.984926 | 5.389042  | 0.172577  |
| H                                                                                | 3.590014 | -4.632849 | -1.483014 | C                                                                                                       | -3.799131 | 3.917843  | -0.859756 |
| C                                                                                | 4.032268 | -3.907395 | -0.808637 | H                                                                                                       | -3.291668 | 4.646844  | -1.484428 |
| C                                                                                | 3.707717 | -2.563983 | -0.931941 | C                                                                                                       | -3.492745 | 2.567429  | -0.9856   |
| H                                                                                | 3.007351 | -2.242778 | -1.697586 | H                                                                                                       | -2.743797 | 2.246002  | -1.705882 |
| C                                                                                | 4.806233 | 0.700029  | -1.719945 | C                                                                                                       | -4.620119 | -0.679002 | -1.894926 |
| C                                                                                | 4.418436 | 1.875898  | -2.3671   | C                                                                                                       | -4.176772 | -1.822129 | -2.571041 |
| H                                                                                | 3.528869 | 2.404868  | -2.037779 | H                                                                                                       | -3.289453 | -2.346104 | -2.223514 |
| C                                                                                | 5.163367 | 2.36293   | -3.432039 | C                                                                                                       | -4.865649 | -2.283418 | -3.687574 |
| H                                                                                | 4.857901 | 3.276192  | -3.931174 | H                                                                                                       | -4.516847 | -3.169413 | -4.209478 |
| C                                                                                | 6.291687 | 1.674674  | -3.86495  | C                                                                                                       | -5.993755 | -1.602984 | -4.140956 |
| H                                                                                | 6.8689   | 2.052118  | -4.7022   | H                                                                                                       | -6.526632 | -1.959798 | -5.017259 |
| H                                                                                | 7.550909 | -0.042409 | -3.571511 | C                                                                                                       | -6.434122 | -0.461249 | -3.476432 |
| C                                                                                | 6.675077 | 0.49924   | -3.230878 | H                                                                                                       | -7.309831 | 0.073007  | -3.832449 |
| C                                                                                | 5.937024 | 0.010319  | -2.159344 | C                                                                                                       | -5.751583 | 0.002848  | -2.355299 |
| H                                                                                | 6.236507 | -0.91126  | -1.671234 | H                                                                                                       | -6.093958 | 0.897897  | -1.843715 |
| <b>14</b>                                                                        |          |           |           | <b>TS9</b>                                                                                              |           |           |           |
| Thermal correction to Gibbs Free Energy=<br>0.780118<br>E(RBMK) = -3024.56466953 |          |           |           | Thermal correction to Gibbs Free Energy=<br>0.770188<br>E(RBMK) = -3024.51587469<br>Frequency -979.3399 |           |           |           |
| C                                                                                | 1.294465 | -0.506465 | 0.627412  | H                                                                                                       | 0.685883  | -0.952756 | 1.878686  |
| C                                                                                | 1.666606 | -0.516996 | 2.160448  | C                                                                                                       | 1.313097  | -0.485697 | 0.70506   |
| C                                                                                | 1.928097 | 0.583229  | -0.185725 | C                                                                                                       | 1.796233  | -0.539617 | 2.224308  |
| C                                                                                | 3.124694 | -0.29426  | 2.381255  | C                                                                                                       | 1.933354  | 0.64627   | -0.128105 |
| C                                                                                | 0.791042 | 0.315602  | 3.018821  | C                                                                                                       | 2.859149  | -1.408568 | 2.612454  |
| C                                                                                | 1.931395 | 2.005591  | 0.287624  | C                                                                                                       | 1.400021  | 0.503489  | 3.100942  |
| C                                                                                | 3.556595 | 0.760041  | 3.208053  | C                                                                                                       | 2.07645   | 2.0275    | 0.421687  |
| C                                                                                | 1.234825 | 1.274963  | 3.864518  | C                                                                                                       | 3.529205  | -1.115437 | 3.800935  |
| C                                                                                | 2.64819  | 1.500394  | 3.916893  | C                                                                                                       | 2.067509  | 0.778609  | 4.277303  |
| C                                                                                | 0.323416 | 2.102836  | 4.717377  | C                                                                                                       | 3.159398  | -0.04313  | 4.595403  |

|    |           |           |           |    |           |           |           |
|----|-----------|-----------|-----------|----|-----------|-----------|-----------|
| H  | 1.671715  | -1.437078 | 0.195203  | C  | 1.644348  | 1.888541  | 5.191509  |
| H  | 1.437687  | -1.557964 | 2.446099  | H  | 1.598088  | -1.430013 | 0.24964   |
| O  | 2.457104  | 0.285395  | -1.245262 | O  | 2.300023  | 0.316212  | -1.231689 |
| S  | 4.363666  | -1.206206 | 1.669831  | S  | 3.487321  | -2.74807  | 1.673634  |
| C  | 3.628179  | -2.665946 | 1.048766  | C  | 2.03225   | -3.556973 | 1.087608  |
| C  | 4.201019  | -3.37343  | 0.059055  | C  | 1.989427  | -4.266587 | -0.048883 |
| C  | 5.329543  | -2.855164 | -0.742468 | C  | 3.100735  | -4.295128 | -1.032462 |
| C  | 3.686444  | -4.738544 | -0.273713 | C  | 0.786727  | -5.104745 | -0.36535  |
| C  | 6.512746  | -3.592564 | -0.857971 | C  | 3.731573  | -5.503019 | -1.341418 |
| C  | 5.208182  | -1.638738 | -1.424588 | C  | 3.505519  | -3.130557 | -1.690511 |
| C  | 7.568385  | -3.105603 | -1.613889 | C  | 4.759867  | -5.542453 | -2.273209 |
| C  | 6.264299  | -1.167915 | -2.194662 | C  | 4.525662  | -3.176849 | -2.631766 |
| C  | 7.445466  | -1.893108 | -2.285334 | C  | 5.157851  | -4.379691 | -2.922315 |
| H  | -0.271458 | 0.104903  | 2.930586  | H  | 0.52054   | 1.080497  | 2.827713  |
| H  | 1.531844  | 2.115238  | 1.29802   | H  | 1.217164  | 2.265422  | 1.056045  |
| H  | 2.982101  | 2.320154  | 0.300297  | H  | 2.938084  | 2.014336  | 1.105283  |
| Si | 1.09615   | 3.336133  | -0.831036 | Si | 2.371478  | 3.464     | -0.826234 |
| C  | 1.497494  | 3.001728  | -2.666967 | C  | 4.206514  | 3.472177  | -1.357155 |
| C  | 1.541754  | 4.265056  | -3.533664 | C  | 4.731053  | 4.863981  | -1.72876  |
| C  | 0.564145  | 1.96504   | -3.299064 | C  | 4.520916  | 2.475487  | -2.477212 |
| C  | -0.789925 | 3.315745  | -0.542526 | C  | 1.210051  | 3.258005  | -2.31965  |
| C  | -1.474842 | 4.522554  | -1.192091 | C  | 1.20533   | 4.499376  | -3.218146 |
| C  | -1.227994 | 3.167908  | 0.915741  | C  | -0.219765 | 2.836703  | -1.974018 |
| C  | 1.897818  | 4.989187  | -0.311678 | C  | 2.028263  | 5.039633  | 0.195903  |
| C  | 3.417756  | 4.967575  | -0.505135 | C  | 2.908083  | 5.088391  | 1.450133  |
| C  | 1.554566  | 5.460285  | 1.103074  | C  | 0.560949  | 5.261829  | 0.568128  |
| H  | 1.486144  | 5.727511  | -1.0146   | H  | 2.330098  | 5.872838  | -0.453911 |
| H  | 4.618394  | 0.95859   | 3.312658  | H  | 4.34684   | -1.757417 | 4.110737  |
| H  | 2.785394  | -3.05103  | 1.614688  | H  | 1.204911  | -3.57676  | 1.792915  |
| H  | 3.716421  | 4.610341  | -1.494931 | H  | 3.970757  | 4.956069  | 1.225901  |
| H  | 2.502656  | 2.560137  | -2.652418 | H  | 4.755441  | 3.146092  | -0.460408 |
| H  | -1.137644 | 2.416398  | -1.071985 | H  | 1.660379  | 2.432559  | -2.887104 |
| H  | 3.356221  | -4.76662  | -1.316756 | H  | 0.376943  | -4.824759 | -1.341033 |
| H  | 2.860703  | -5.03819  | 0.373843  | H  | 0.006878  | -5.00585  | 0.392731  |
| H  | 4.48567   | -5.480583 | -0.178976 | H  | 1.063224  | -6.16193  | -0.435366 |
| H  | 6.618158  | -4.53801  | -0.335633 | H  | 3.429343  | -6.415263 | -0.836601 |
| H  | 4.274329  | -1.084755 | -1.387847 | H  | 3.015617  | -2.183986 | -1.482865 |
| H  | 8.488633  | -3.675342 | -1.682874 | H  | 5.250022  | -6.484603 | -2.493789 |
| H  | 6.155272  | -0.232556 | -2.732794 | H  | 4.824539  | -2.266679 | -3.140787 |
| H  | 8.268476  | -1.520631 | -2.885686 | H  | 5.956886  | -4.412288 | -3.655088 |
| H  | 3.021303  | 2.286991  | 4.567849  | H  | 3.707153  | 0.136765  | 5.515933  |
| H  | 3.904608  | 4.323874  | 0.236414  | H  | 2.623291  | 4.309157  | 2.167065  |
| H  | 3.839438  | 5.970656  | -0.376303 | H  | 2.800193  | 6.049646  | 1.965186  |
| H  | 2.078944  | 6.394159  | 1.336959  | H  | 0.451325  | 6.164539  | 1.180584  |

|    |           |           |           |    |           |           |           |
|----|-----------|-----------|-----------|----|-----------|-----------|-----------|
| H  | 1.858306  | 4.726069  | 1.859368  | H  | 0.15566   | 4.42856   | 1.155976  |
| H  | 0.485733  | 5.64889   | 1.231062  | H  | -0.074367 | 5.387669  | -0.312163 |
| H  | 1.83261   | 4.009613  | -4.559024 | H  | 5.798258  | 4.813763  | -1.971678 |
| H  | 2.25737   | 5.006535  | -3.169266 | H  | 4.614839  | 5.592267  | -0.921779 |
| H  | 0.564466  | 4.755382  | -3.593505 | H  | 4.223495  | 5.266551  | -2.611266 |
| H  | 0.556895  | 1.024049  | -2.742972 | H  | 4.181903  | 1.4641    | -2.243805 |
| H  | 0.888011  | 1.734966  | -4.320713 | H  | 5.599887  | 2.441246  | -2.665361 |
| H  | -0.463306 | 2.340692  | -3.361163 | H  | 4.041796  | 2.775194  | -3.415667 |
| H  | -1.253693 | 4.599264  | -2.260226 | H  | 2.207413  | 4.759168  | -3.570344 |
| H  | -1.164756 | 5.463137  | -0.724122 | H  | 0.801195  | 5.375523  | -2.6994   |
| H  | -2.563991 | 4.452172  | -1.090004 | H  | 0.583156  | 4.333591  | -4.105043 |
| H  | -0.906886 | 4.011356  | 1.534102  | H  | -0.757924 | 3.620505  | -1.431897 |
| H  | -0.832563 | 2.252018  | 1.367942  | H  | -0.249652 | 1.926387  | -1.362969 |
| H  | -2.322646 | 3.124457  | 0.978993  | H  | -0.791402 | 2.625595  | -2.885306 |
| H  | -0.717708 | 1.804607  | 4.58673   | H  | 0.770745  | 2.415256  | 4.803818  |
| H  | 0.407731  | 3.164167  | 4.463471  | H  | 2.449787  | 2.618056  | 5.317734  |
| H  | 0.576855  | 1.999307  | 5.776694  | H  | 1.394633  | 1.505389  | 6.185101  |
| Au | -0.776154 | -0.63488  | 0.236225  | Au | -0.801327 | -0.371139 | 0.331033  |
| P  | -3.053256 | -0.945288 | -0.206169 | P  | -3.082084 | -0.282345 | -0.163104 |
| C  | -4.071116 | -0.808613 | 1.301191  | C  | -3.946281 | 1.024584  | 0.761963  |
| C  | -5.06688  | -1.735834 | 1.607132  | C  | -5.173453 | 0.794842  | 1.383665  |
| H  | -5.246524 | -2.579433 | 0.949355  | H  | -5.629137 | -0.188881 | 1.346095  |
| C  | -5.828684 | -1.58073  | 2.760307  | C  | -5.811569 | 1.830983  | 2.056702  |
| H  | -6.60018  | -2.306095 | 2.994777  | H  | -6.764919 | 1.649229  | 2.54069   |
| C  | -5.605861 | -0.502196 | 3.606439  | C  | -5.232682 | 3.09249   | 2.107906  |
| H  | -6.204334 | -0.383456 | 4.503218  | H  | -5.734524 | 3.897994  | 2.632996  |
| C  | -4.613534 | 0.425256  | 3.304125  | C  | -4.008425 | 3.323908  | 1.487889  |
| H  | -4.440163 | 1.270264  | 3.962082  | H  | -3.555364 | 4.308686  | 1.526434  |
| C  | -3.842876 | 0.270323  | 2.160641  | C  | -3.362312 | 2.293493  | 0.820823  |
| H  | -3.067131 | 0.993607  | 1.926628  | H  | -2.406565 | 2.476282  | 0.337835  |
| C  | -3.759168 | 0.244737  | -1.39049  | C  | -3.382155 | 0.053559  | -1.923912 |
| C  | -4.993394 | 0.858492  | -1.175108 | C  | -4.451342 | 0.849681  | -2.337945 |
| H  | -5.553683 | 0.65445   | -0.268874 | H  | -5.10566  | 1.309973  | -1.605032 |
| C  | -5.505133 | 1.736046  | -2.124541 | C  | -4.670241 | 1.0605    | -3.693819 |
| H  | -6.464249 | 2.212588  | -1.952986 | H  | -5.499531 | 1.681944  | -4.013526 |
| C  | -4.793663 | 1.999152  | -3.28841  | C  | -3.828756 | 0.480906  | -4.635931 |
| H  | -5.197022 | 2.682842  | -4.027601 | H  | -4.001723 | 0.650317  | -5.693196 |
| C  | -3.562439 | 1.388515  | -3.505444 | C  | -2.760495 | -0.309794 | -4.225646 |
| H  | -3.003536 | 1.593755  | -4.412029 | H  | -2.098377 | -0.756015 | -4.959446 |
| C  | -3.041425 | 0.518615  | -2.558082 | C  | -2.532686 | -0.520777 | -2.873111 |
| H  | -2.07556  | 0.051412  | -2.726886 | H  | -1.690098 | -1.128307 | -2.555459 |
| C  | -3.413239 | -2.592176 | -0.896562 | C  | -3.935079 | -1.841006 | 0.227097  |
| C  | -2.694773 | -3.690767 | -0.41814  | C  | -3.656984 | -2.470386 | 1.443883  |
| H  | -1.91488  | -3.544263 | 0.323533  | H  | -2.928859 | -2.039267 | 2.125105  |

|                                                                                  |           |           |           |   |           |           |           |
|----------------------------------------------------------------------------------|-----------|-----------|-----------|---|-----------|-----------|-----------|
| C                                                                                | -2.9732   | -4.965027 | -0.892147 | C | -4.313526 | -3.643885 | 1.785075  |
| H                                                                                | -2.414097 | -5.815259 | -0.516735 | H | -4.099043 | -4.127011 | 2.732127  |
| C                                                                                | -3.960374 | -5.149007 | -1.854433 | C | -5.240414 | -4.202065 | 0.910058  |
| H                                                                                | -4.172129 | -6.144208 | -2.230226 | H | -5.748512 | -5.122952 | 1.174931  |
| C                                                                                | -4.670212 | -4.057853 | -2.340419 | C | -5.511963 | -3.583984 | -0.303863 |
| H                                                                                | -5.435844 | -4.199056 | -3.095493 | H | -6.231032 | -4.020525 | -0.988302 |
| C                                                                                | -4.401612 | -2.780273 | -1.863674 | C | -4.863829 | -2.40326  | -0.648623 |
| H                                                                                | -4.955306 | -1.93088  | -2.24958  | H | -5.07704  | -1.925319 | -1.598791 |
| <b>15</b>                                                                        |           |           |           |   |           |           |           |
| Thermal correction to Gibbs Free Energy=<br>0.780474<br>E(RBMK) = -3024.63566832 |           |           |           |   |           |           |           |
| H                                                                                | -2.421611 | -0.383189 | 1.841557  |   |           |           |           |
| C                                                                                | -2.131732 | 0.487228  | 1.237769  |   |           |           |           |
| C                                                                                | -3.004113 | 1.655711  | 1.606338  |   |           |           |           |
| C                                                                                | -2.181825 | 0.032962  | -0.202504 |   |           |           |           |
| C                                                                                | -2.930238 | 2.862106  | 0.894821  |   |           |           |           |
| C                                                                                | -3.878838 | 1.570541  | 2.686186  |   |           |           |           |
| C                                                                                | -3.45045  | -0.058258 | -0.92041  |   |           |           |           |
| C                                                                                | -3.748462 | 3.929195  | 1.252757  |   |           |           |           |
| C                                                                                | -4.696857 | 2.636019  | 3.064655  |   |           |           |           |
| C                                                                                | -4.624335 | 3.813983  | 2.322974  |   |           |           |           |
| C                                                                                | -5.613706 | 2.520487  | 4.245827  |   |           |           |           |
| H                                                                                | -1.078982 | 0.692993  | 1.469955  |   |           |           |           |
| O                                                                                | -1.149815 | -0.394615 | -0.757715 |   |           |           |           |
| S                                                                                | -1.84899  | 3.018995  | -0.510711 |   |           |           |           |
| C                                                                                | -0.30309  | 3.213338  | 0.323909  |   |           |           |           |
| C                                                                                | 0.913192  | 3.365035  | -0.229275 |   |           |           |           |
| C                                                                                | 1.1944    | 3.290069  | -1.679163 |   |           |           |           |
| C                                                                                | 2.066097  | 3.702067  | 0.678941  |   |           |           |           |
| C                                                                                | 2.15992   | 4.126801  | -2.253824 |   |           |           |           |
| C                                                                                | 0.546661  | 2.368797  | -2.513647 |   |           |           |           |
| C                                                                                | 2.445156  | 4.065636  | -3.611356 |   |           |           |           |
| C                                                                                | 0.840837  | 2.299744  | -3.868858 |   |           |           |           |
| C                                                                                | 1.787093  | 3.151915  | -4.426381 |   |           |           |           |
| H                                                                                | -3.934663 | 0.640574  | 3.246423  |   |           |           |           |
| H                                                                                | -4.18082  | 0.662081  | -0.547479 |   |           |           |           |
| H                                                                                | -3.259144 | 0.114751  | -1.982388 |   |           |           |           |
| Si                                                                               | -4.306082 | -1.817817 | -0.908474 |   |           |           |           |
| C                                                                                | -2.942796 | -3.152076 | -0.977283 |   |           |           |           |
| C                                                                                | -3.396889 | -4.459794 | -1.636689 |   |           |           |           |
| C                                                                                | -2.318544 | -3.446944 | 0.390239  |   |           |           |           |
| C                                                                                | -5.347918 | -1.986728 | 0.676368  |   |           |           |           |
| C                                                                                | -6.181042 | -3.274495 | 0.649429  |   |           |           |           |

|    |           |           |           |
|----|-----------|-----------|-----------|
| C  | -6.23208  | -0.78626  | 1.023714  |
| C  | -5.319195 | -1.862278 | -2.51799  |
| C  | -4.434701 | -1.685976 | -3.757055 |
| C  | -6.499212 | -0.888957 | -2.566427 |
| H  | -5.727147 | -2.883459 | -2.545304 |
| H  | -3.690907 | 4.852943  | 0.687871  |
| H  | -0.415942 | 3.307029  | 1.399925  |
| H  | -3.561238 | -2.344505 | -3.75945  |
| H  | -2.158355 | -2.714649 | -1.611245 |
| H  | -4.607494 | -2.094114 | 1.484147  |
| H  | 2.937242  | 3.073782  | 0.471067  |
| H  | 1.793717  | 3.574663  | 1.728014  |
| H  | 2.379384  | 4.743489  | 0.546895  |
| H  | 2.683407  | 4.849308  | -1.63802  |
| H  | -0.182533 | 1.682435  | -2.097157 |
| H  | 3.182487  | 4.739893  | -4.034444 |
| H  | 0.32831   | 1.574091  | -4.491706 |
| H  | 2.008263  | 3.10537   | -5.487304 |
| H  | -5.257304 | 4.655292  | 2.587553  |
| H  | -4.0729   | -0.655735 | -3.847346 |
| H  | -5.006813 | -1.896376 | -4.666909 |
| H  | -7.006078 | -0.954075 | -3.535546 |
| H  | -6.176916 | 0.151258  | -2.444875 |
| H  | -7.245315 | -1.099632 | -1.797084 |
| H  | -2.556416 | -5.159173 | -1.709714 |
| H  | -3.783774 | -4.310729 | -2.647603 |
| H  | -4.178014 | -4.960613 | -1.056587 |
| H  | -1.923056 | -2.552881 | 0.882367  |
| H  | -1.483508 | -4.149622 | 0.288433  |
| H  | -3.042096 | -3.906628 | 1.071291  |
| H  | -5.568168 | -4.169263 | 0.510352  |
| H  | -6.924229 | -3.253706 | -0.154528 |
| H  | -6.728537 | -3.397946 | 1.590255  |
| H  | -7.024473 | -0.637073 | 0.286006  |
| H  | -5.670474 | 0.148481  | 1.100862  |
| H  | -6.724036 | -0.94836  | 1.989805  |
| H  | -5.897551 | 1.482782  | 4.433584  |
| H  | -6.525265 | 3.1039    | 4.099971  |
| H  | -5.125607 | 2.897842  | 5.150901  |
| Au | 0.853934  | -0.540719 | -0.077726 |
| P  | 3.025371  | -0.849689 | 0.496934  |
| C  | 3.327498  | -2.529229 | 1.124144  |
| C  | 4.158712  | -2.754192 | 2.221871  |
| H  | 4.609656  | -1.91896  | 2.747055  |

|   |          |           |           |
|---|----------|-----------|-----------|
| C | 4.403455 | -4.054994 | 2.647135  |
| H | 5.04722  | -4.227515 | 3.502637  |
| C | 3.826027 | -5.128162 | 1.980632  |
| H | 4.018861 | -6.14136  | 2.316195  |
| C | 2.996306 | -4.905448 | 0.886069  |
| H | 2.542296 | -5.742599 | 0.367287  |
| C | 2.742031 | -3.610312 | 0.459621  |
| H | 2.087958 | -3.437745 | -0.390135 |
| C | 4.143322 | -0.611742 | -0.913994 |
| C | 5.280623 | -1.4074   | -1.067825 |
| H | 5.487066 | -2.209415 | -0.366969 |
| C | 6.143952 | -1.17611  | -2.13141  |
| H | 7.024209 | -1.797781 | -2.253    |
| C | 5.877796 | -0.156656 | -3.038075 |
| H | 6.553127 | 0.017511  | -3.868868 |
| C | 4.743326 | 0.633518  | -2.888047 |
| H | 4.524272 | 1.423933  | -3.597284 |
| C | 3.871994 | 0.406584  | -1.831604 |
| H | 2.980631 | 1.01928   | -1.731951 |
| C | 3.571217 | 0.290778  | 1.803719  |
| C | 2.745891 | 0.4894    | 2.913771  |
| H | 1.784612 | -0.012741 | 2.973173  |
| C | 3.155952 | 1.325181  | 3.942086  |
| H | 2.515901 | 1.473392  | 4.805089  |
| C | 4.384173 | 1.975237  | 3.863334  |
| H | 4.701059 | 2.632606  | 4.665756  |
| C | 5.20332  | 1.784633  | 2.757937  |
| H | 6.15974  | 2.291955  | 2.694678  |
| C | 4.802428 | 0.941731  | 1.727142  |
| H | 5.443952 | 0.796647  | 0.864443  |
